# Supplementary material for: Two Different Secondary Metabolism Gene Clusters Occupied the Same Ancestral Locus in Fungal Dermatophytes of the Arthrodermataceae
Source: PubMed Central journal article supplement (PMC3408471; doi:10.1371/journal.pone.0041903), 2012-07-30
Supplement: pone.0041903.s002.pdf [file pone.0041903.s002.pdf]

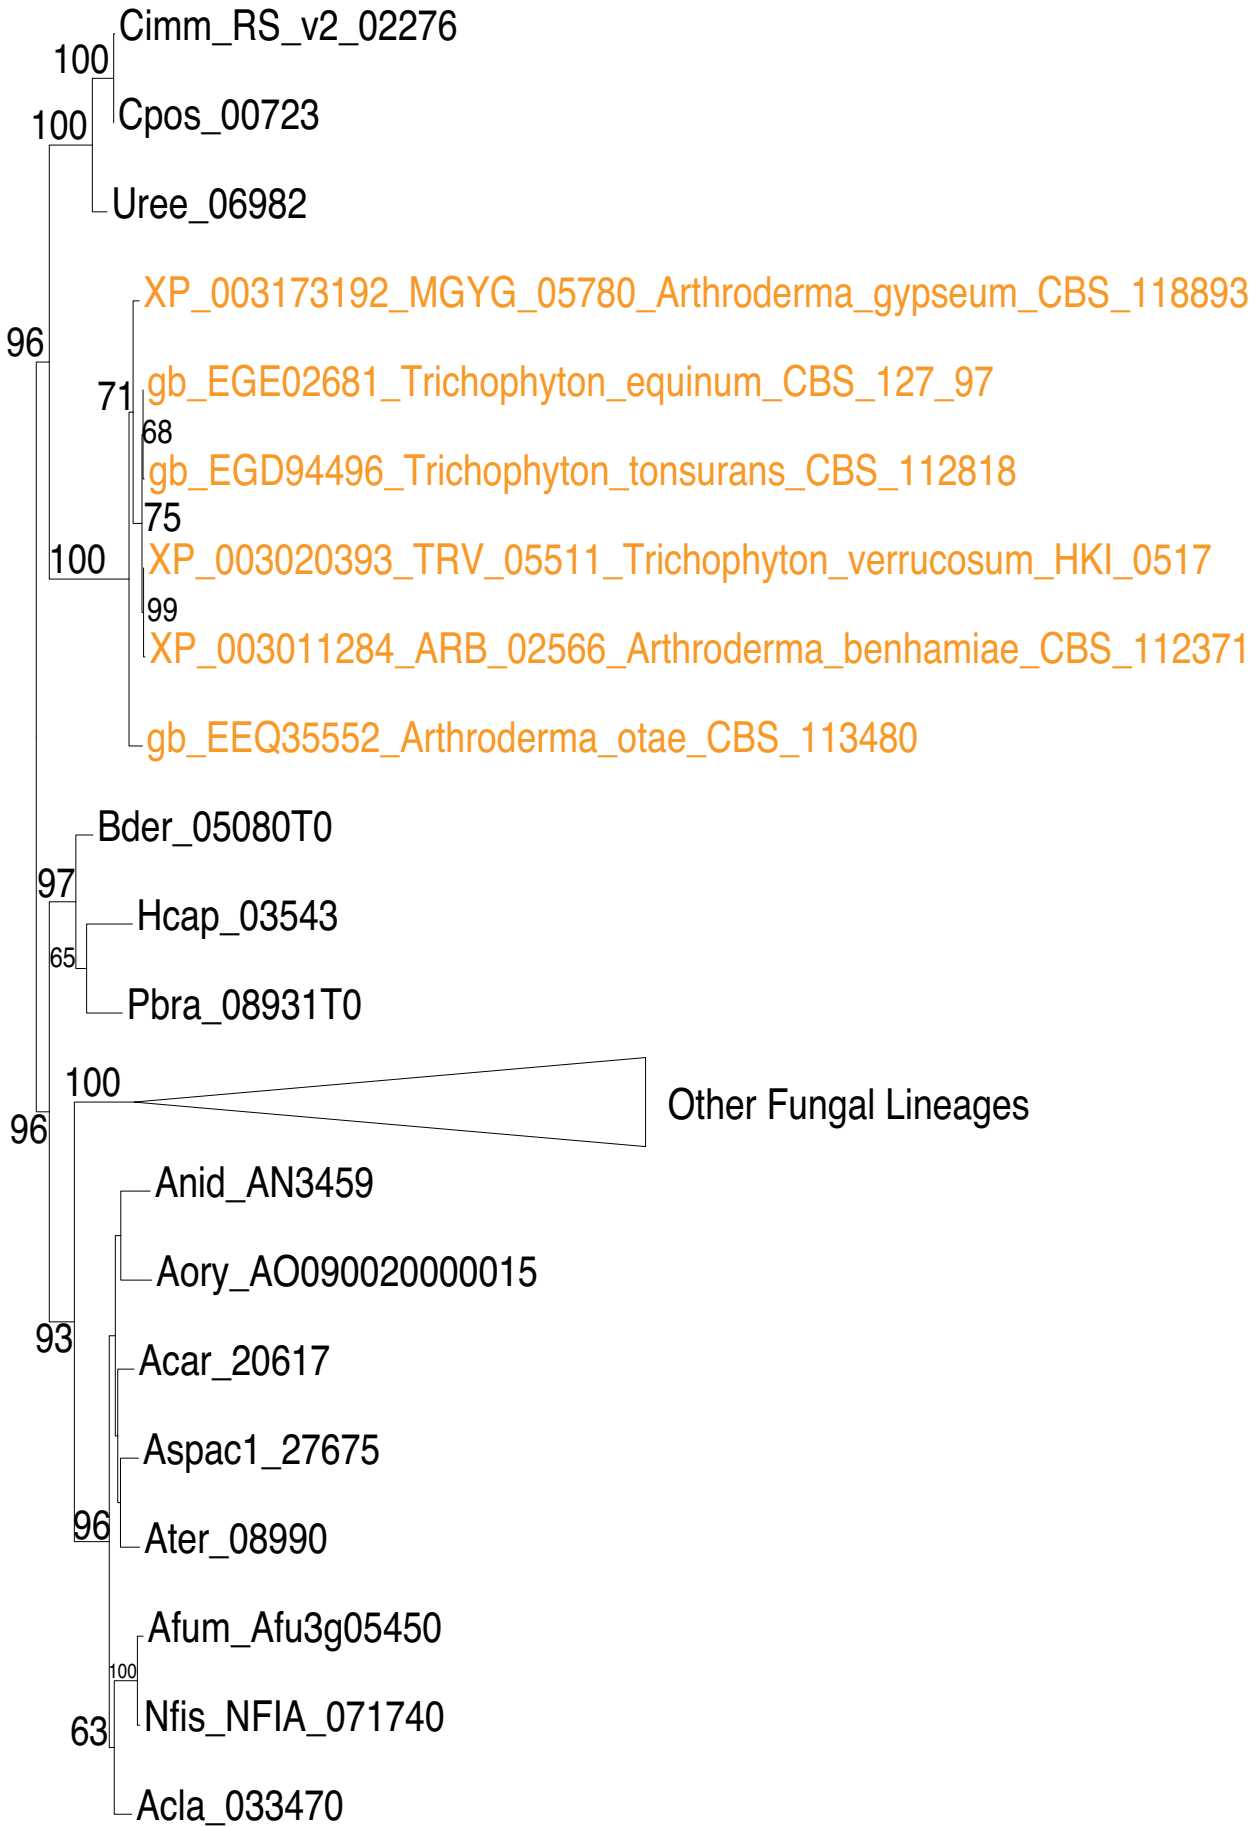

L1

0.4

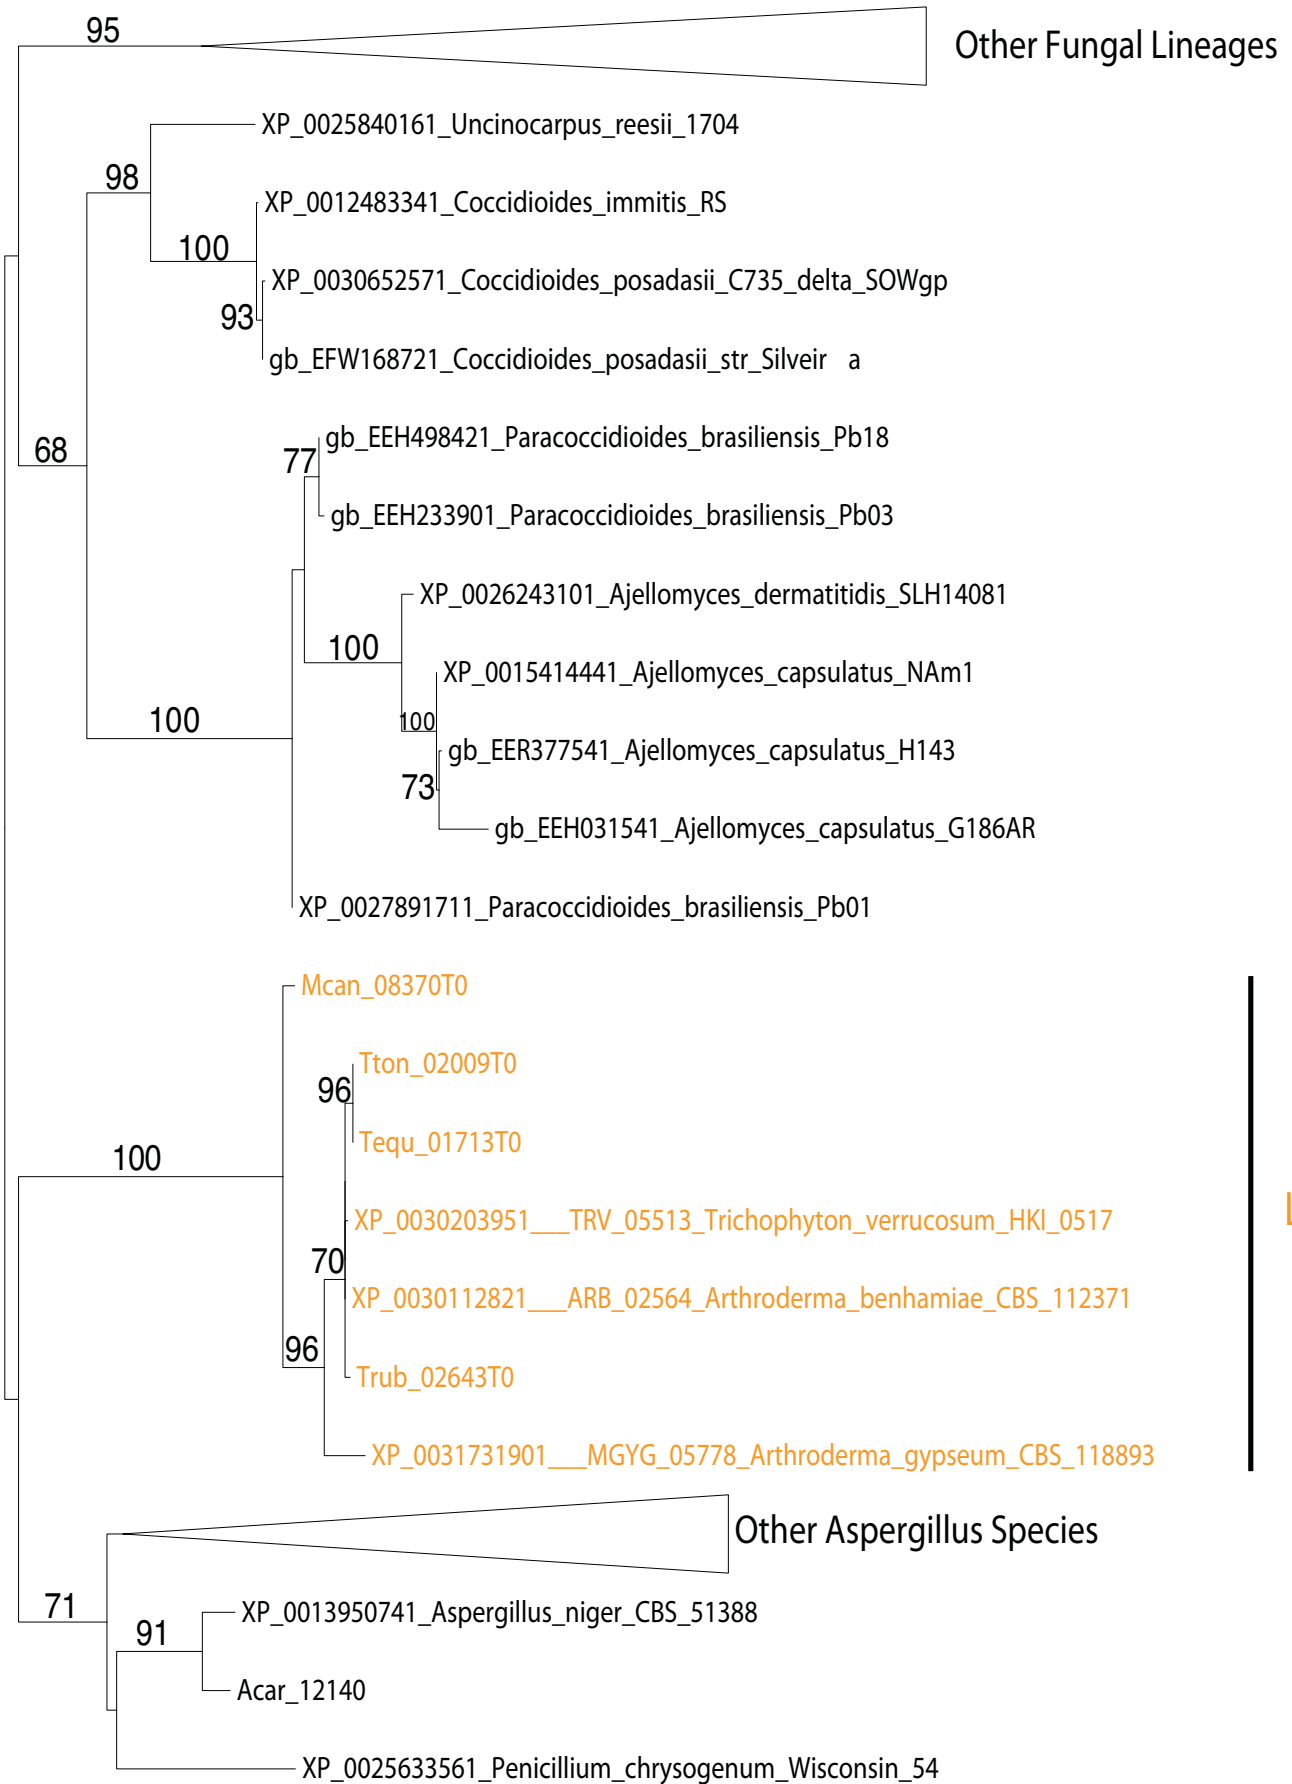

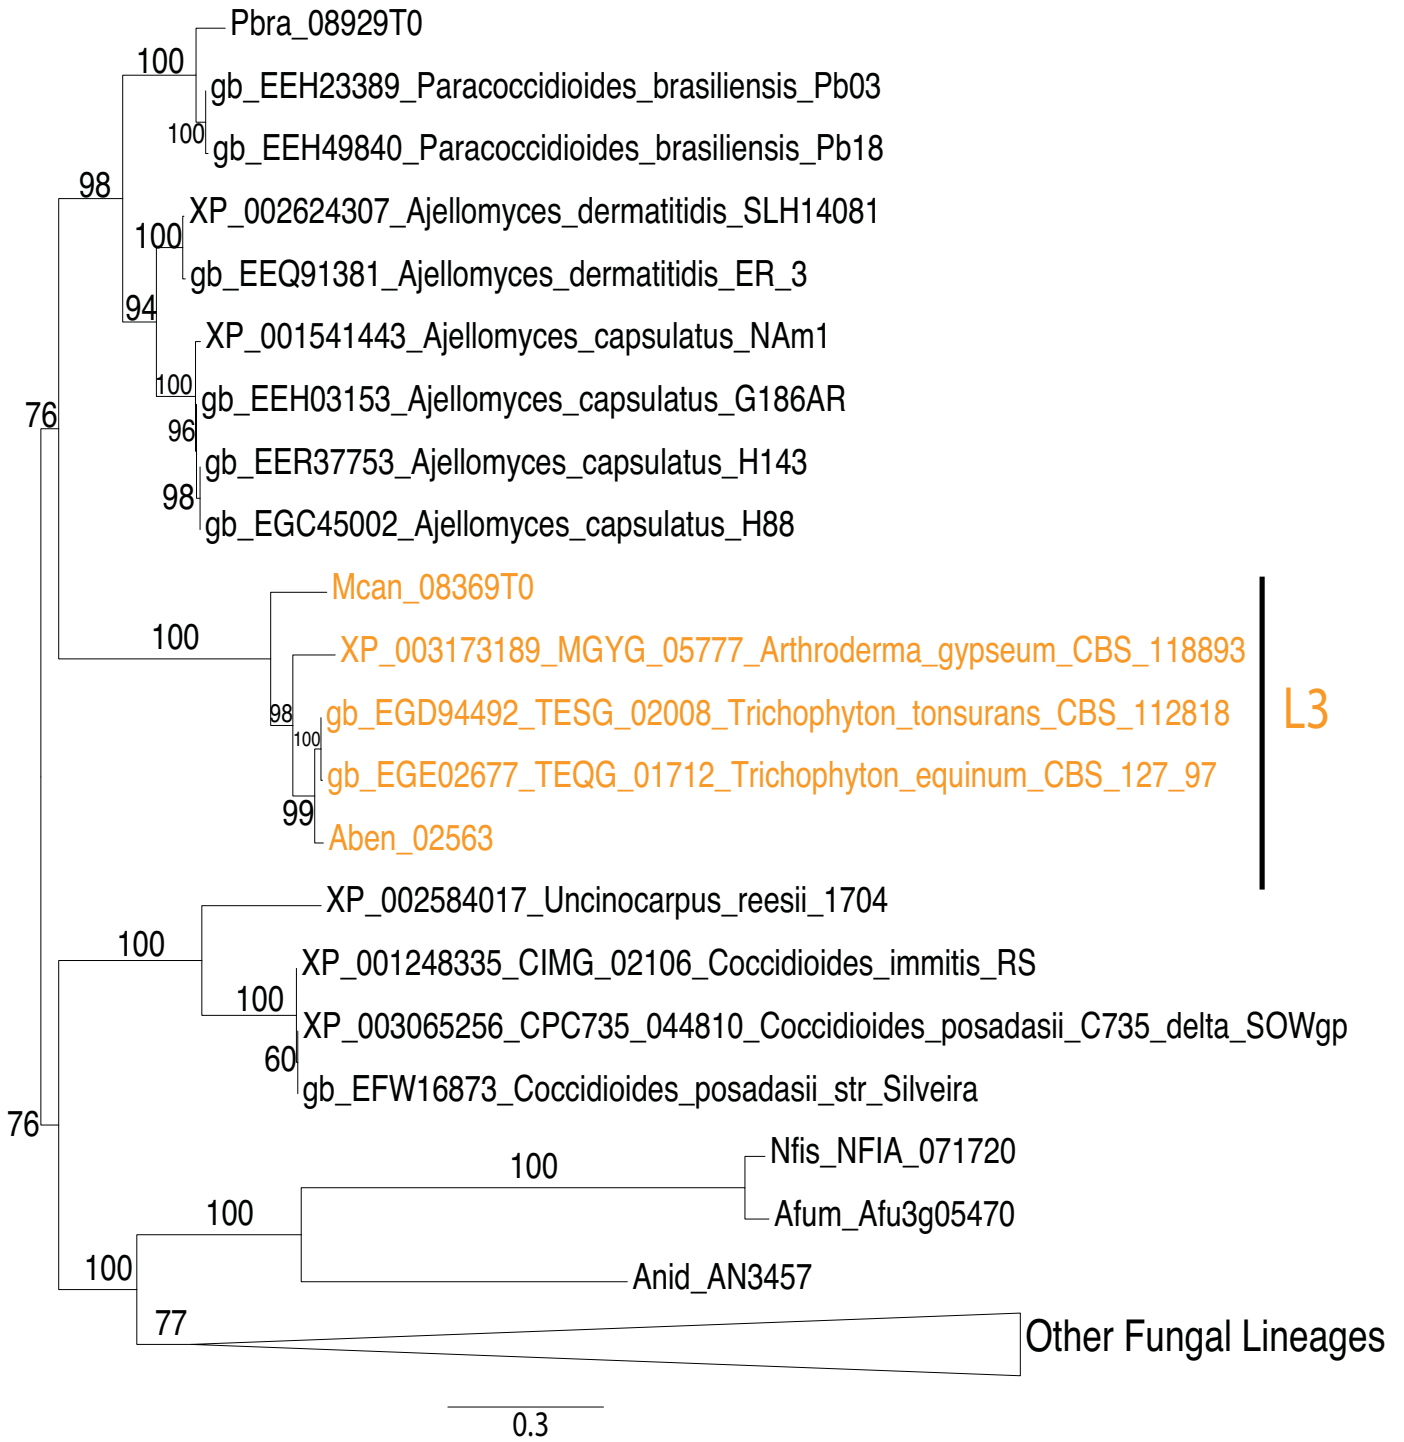

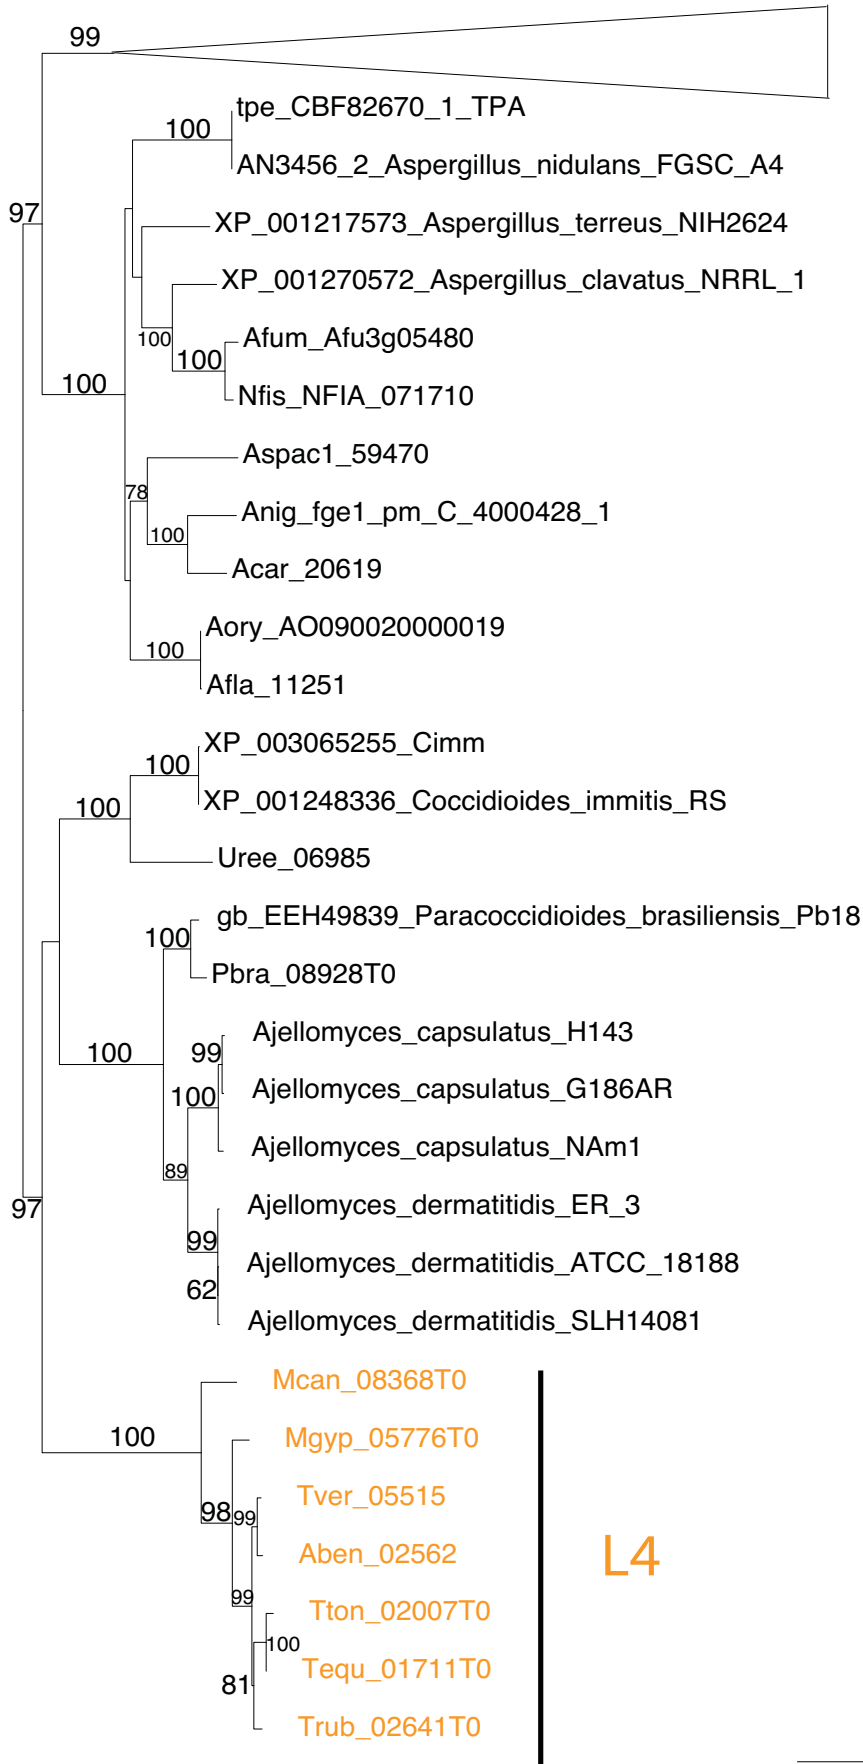

Other Fungal Lineages

L4

0.4

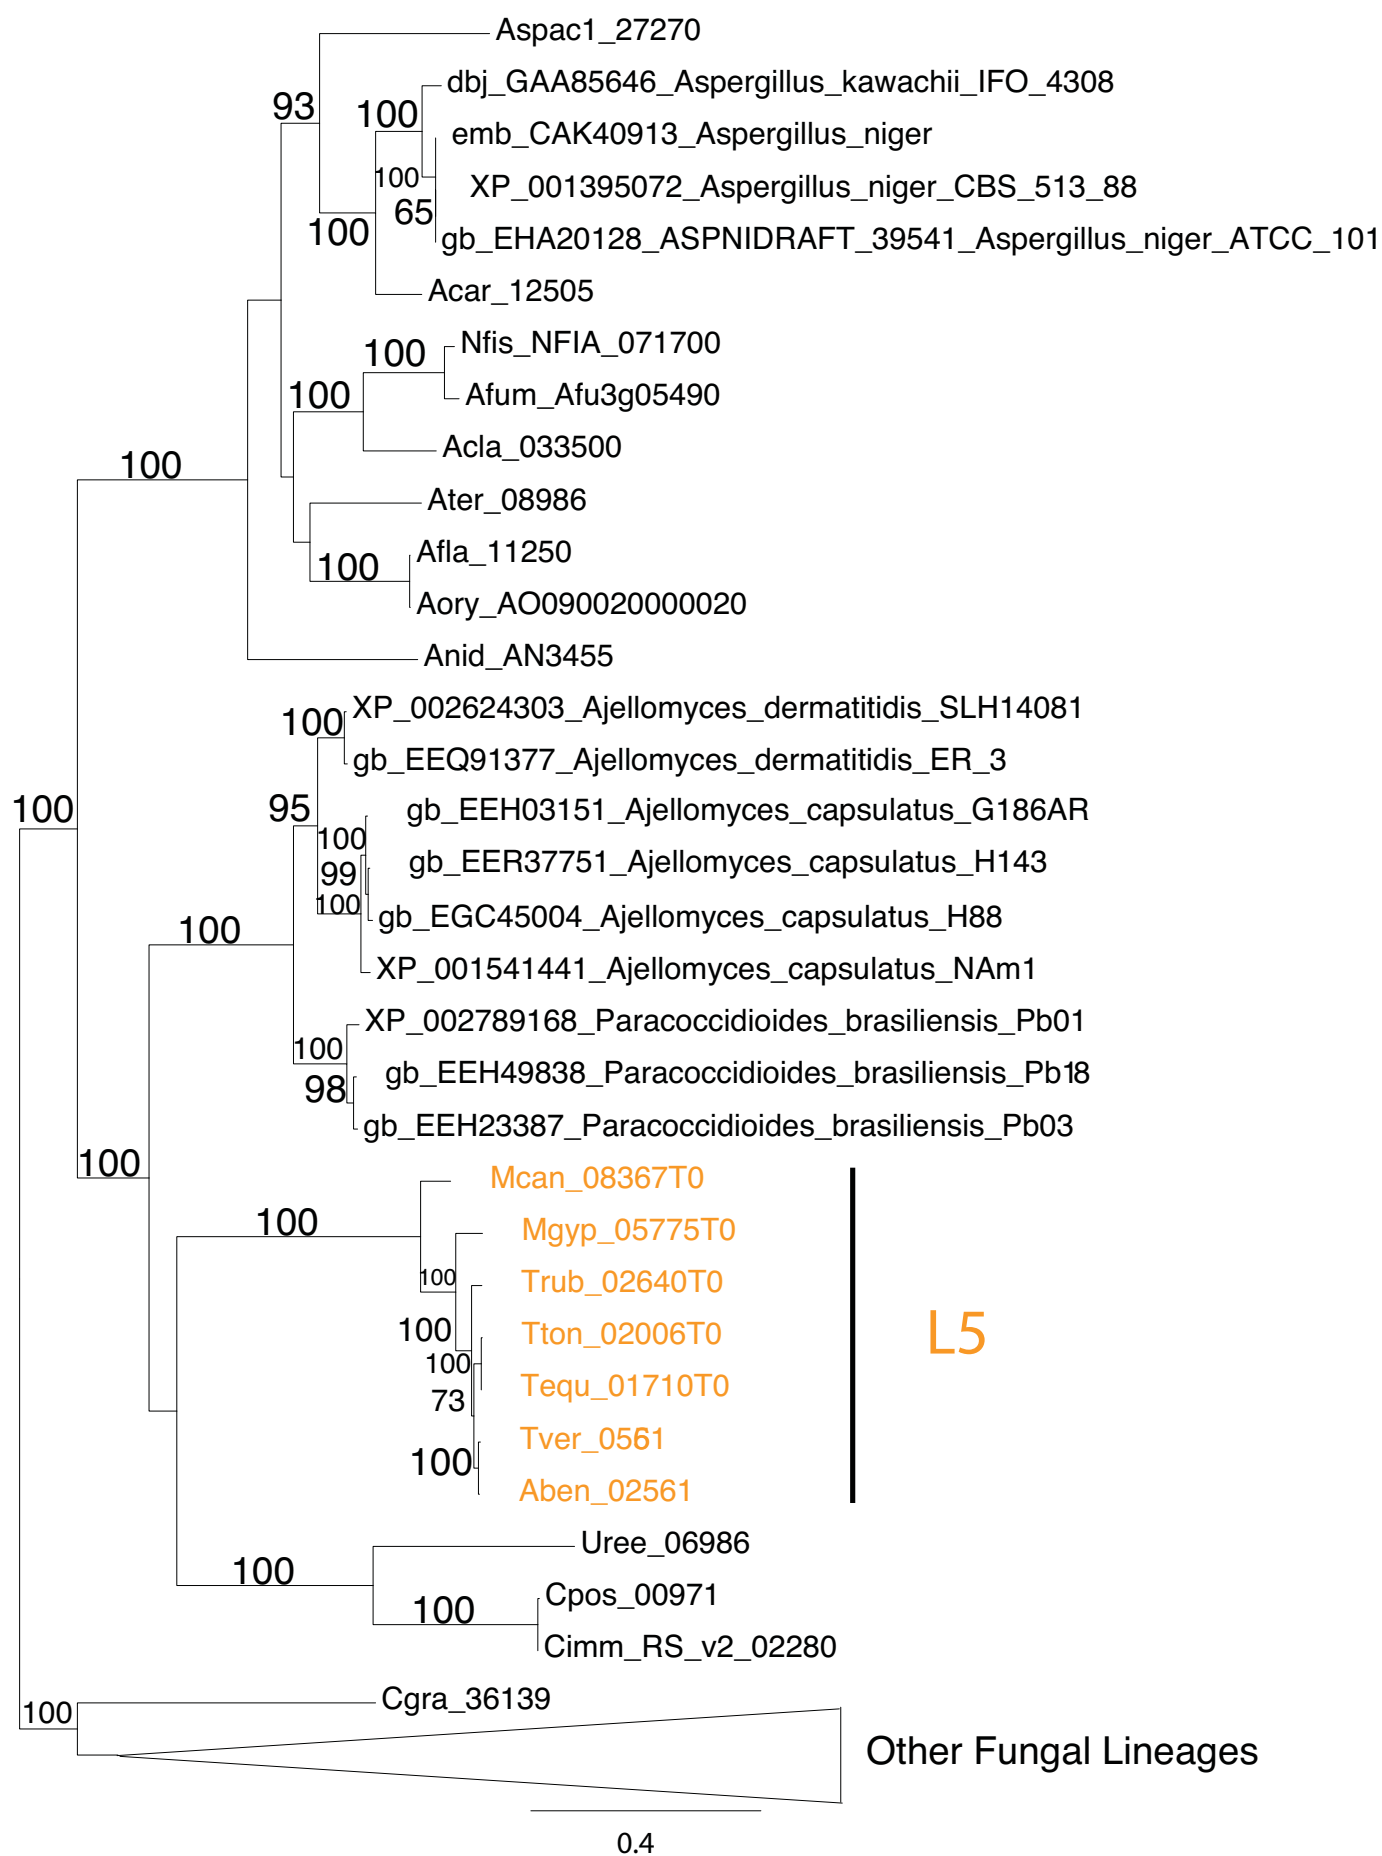



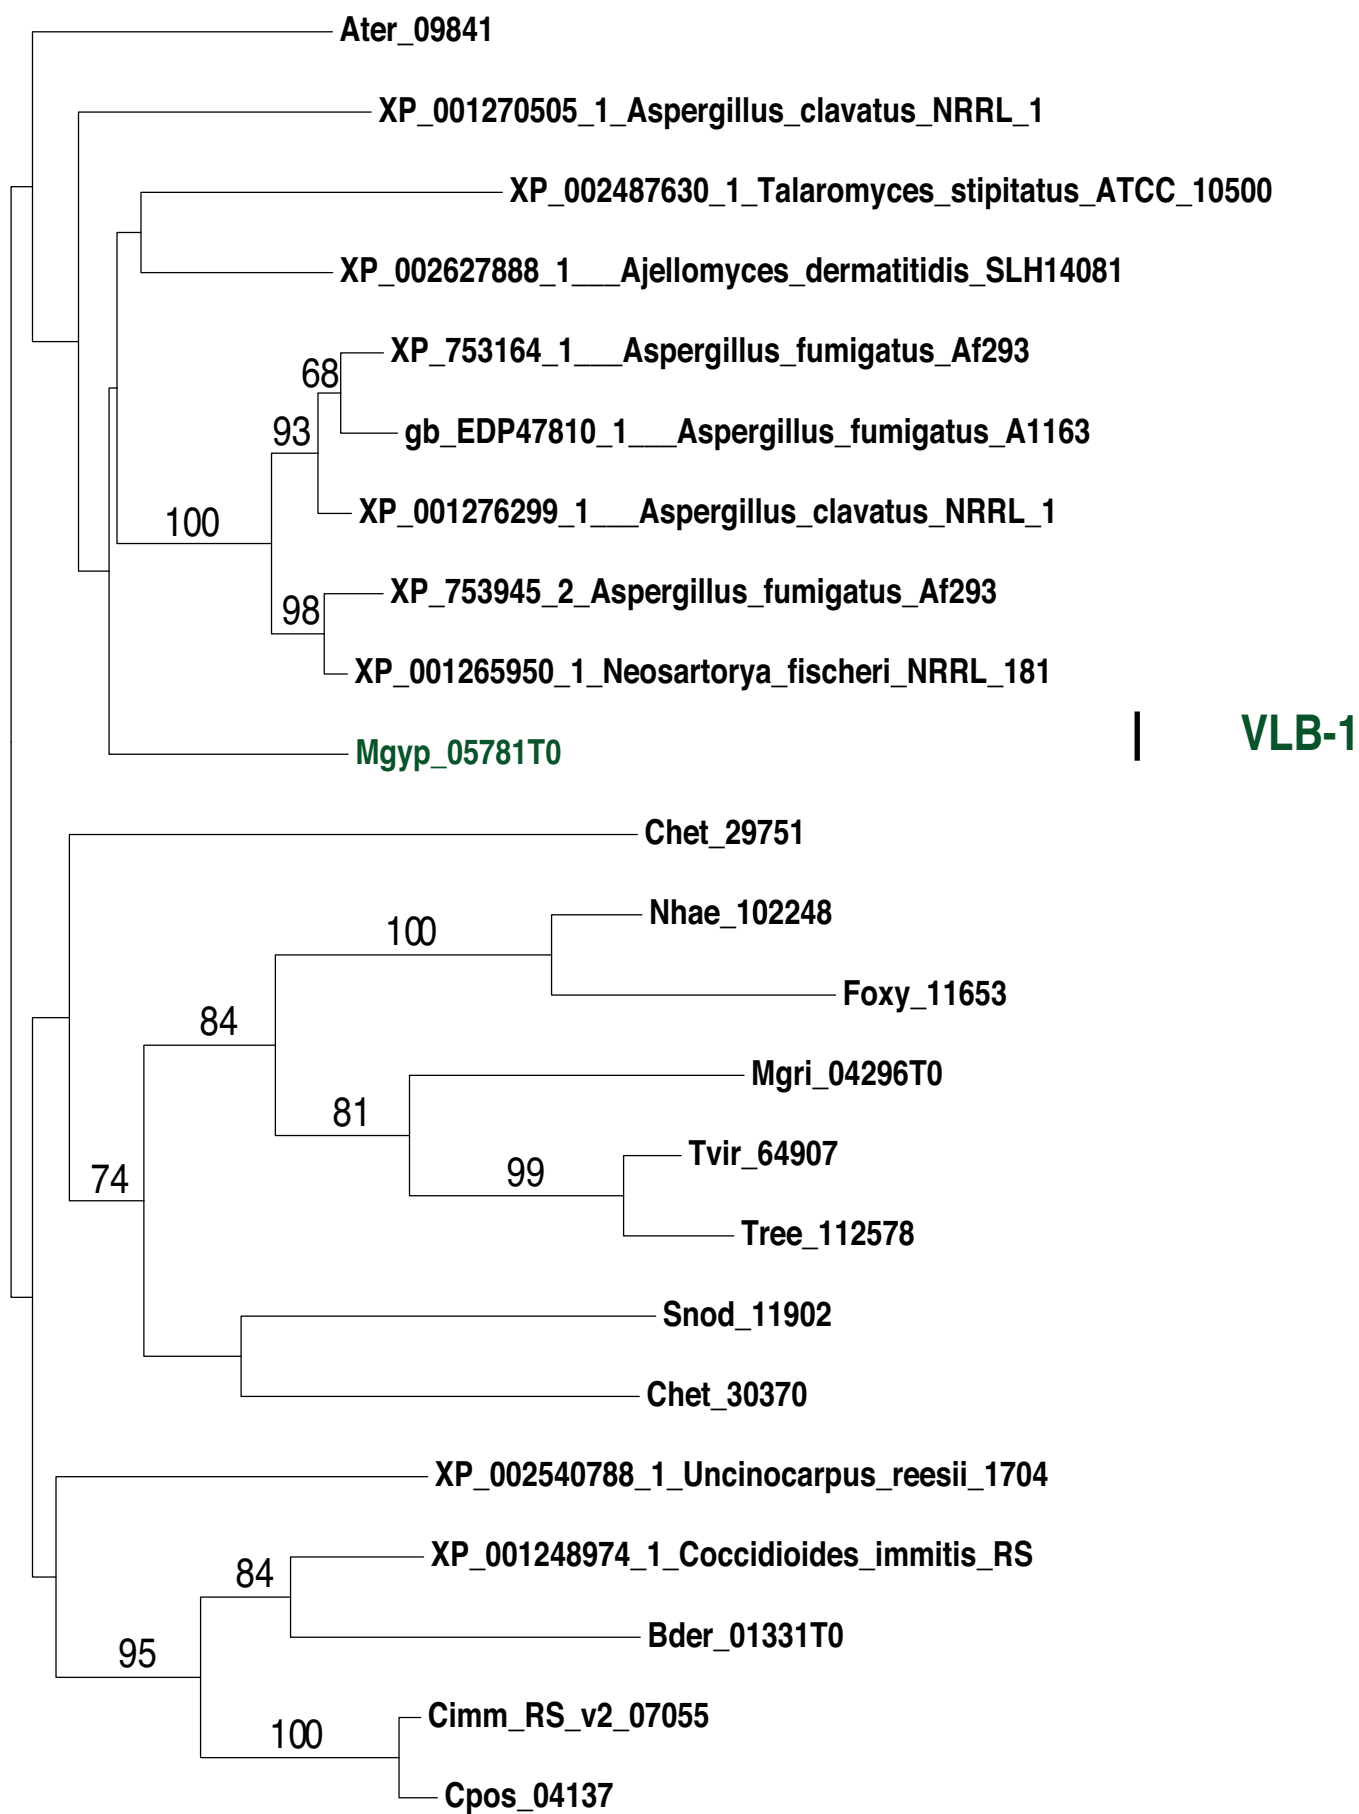

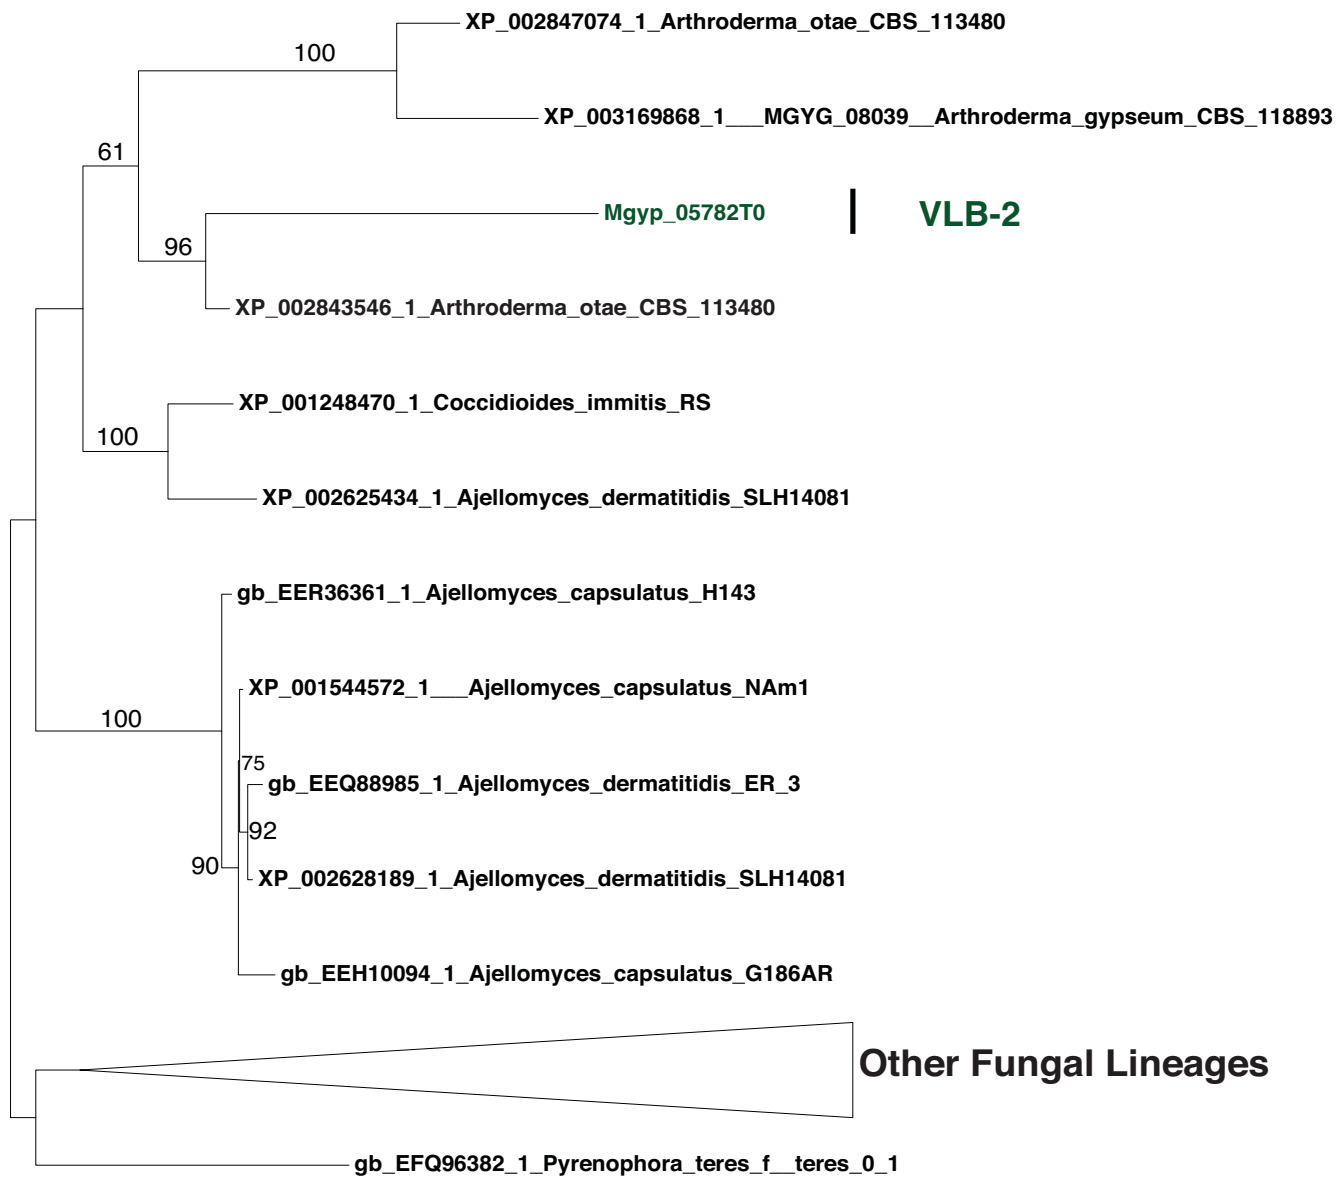

0.3



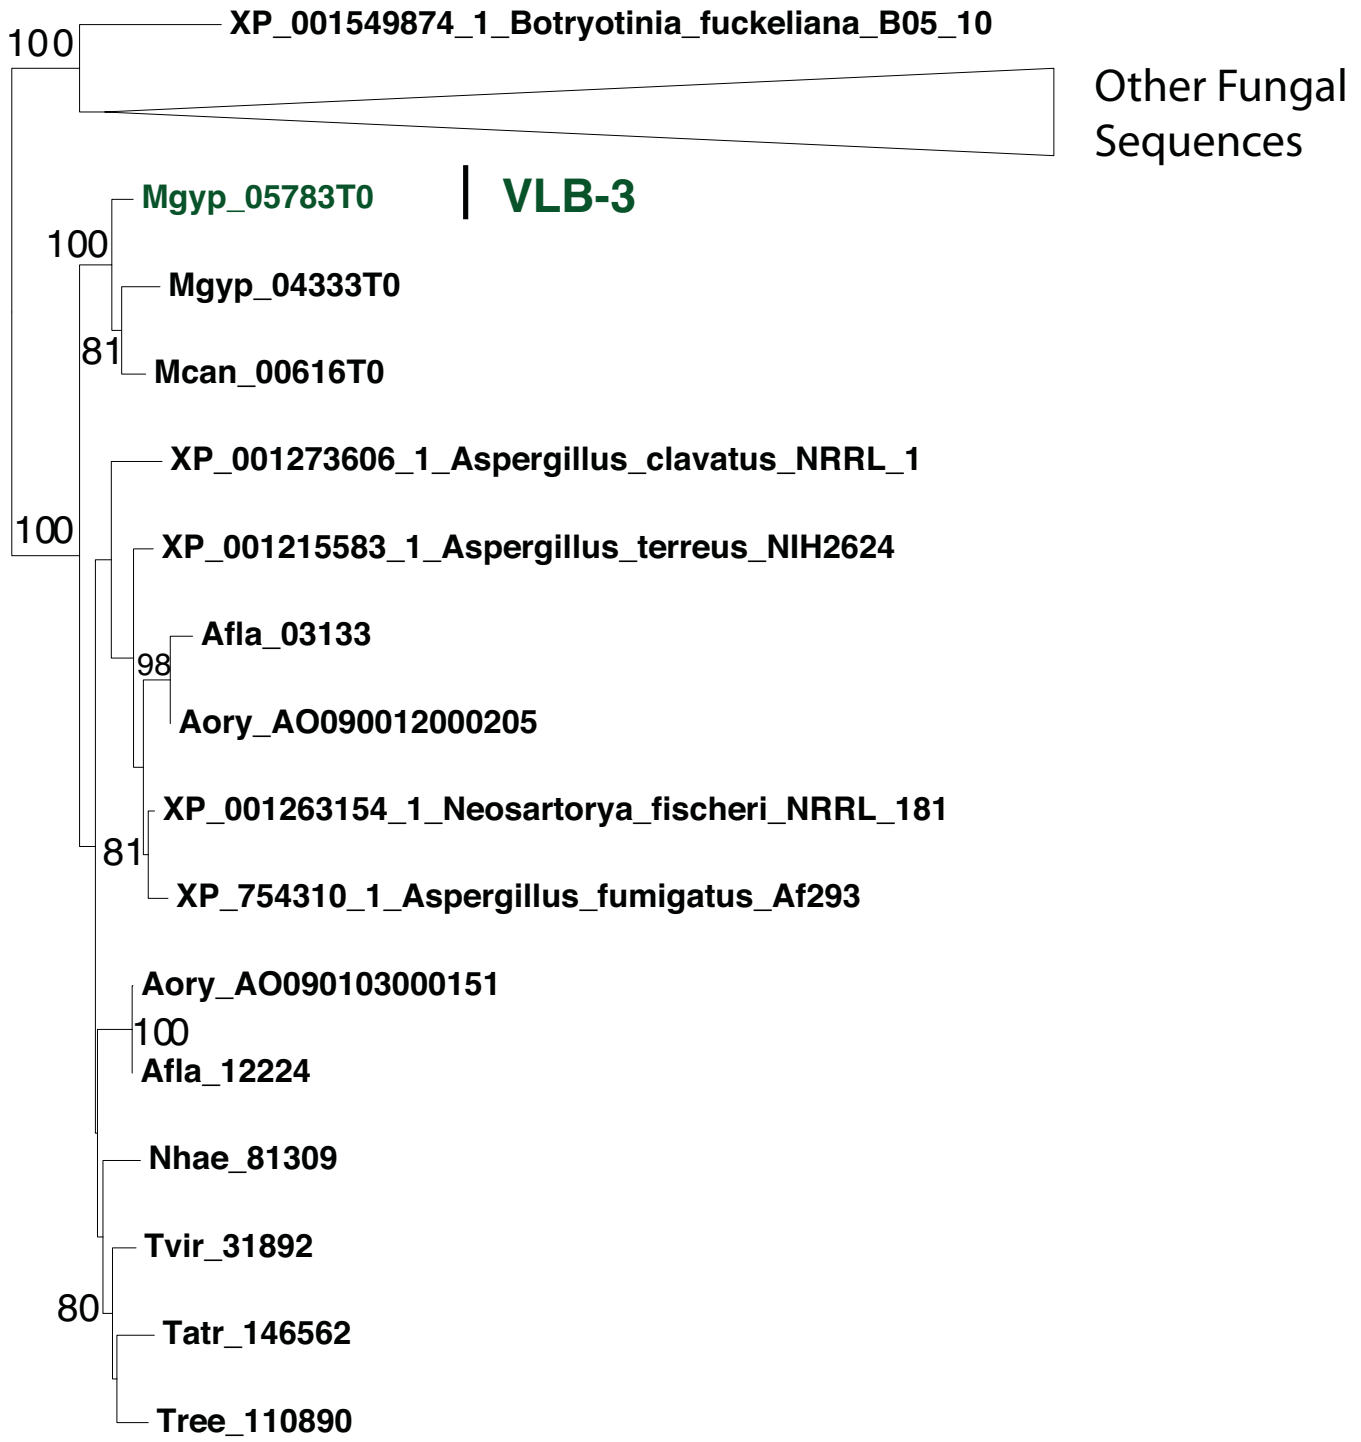

0.4

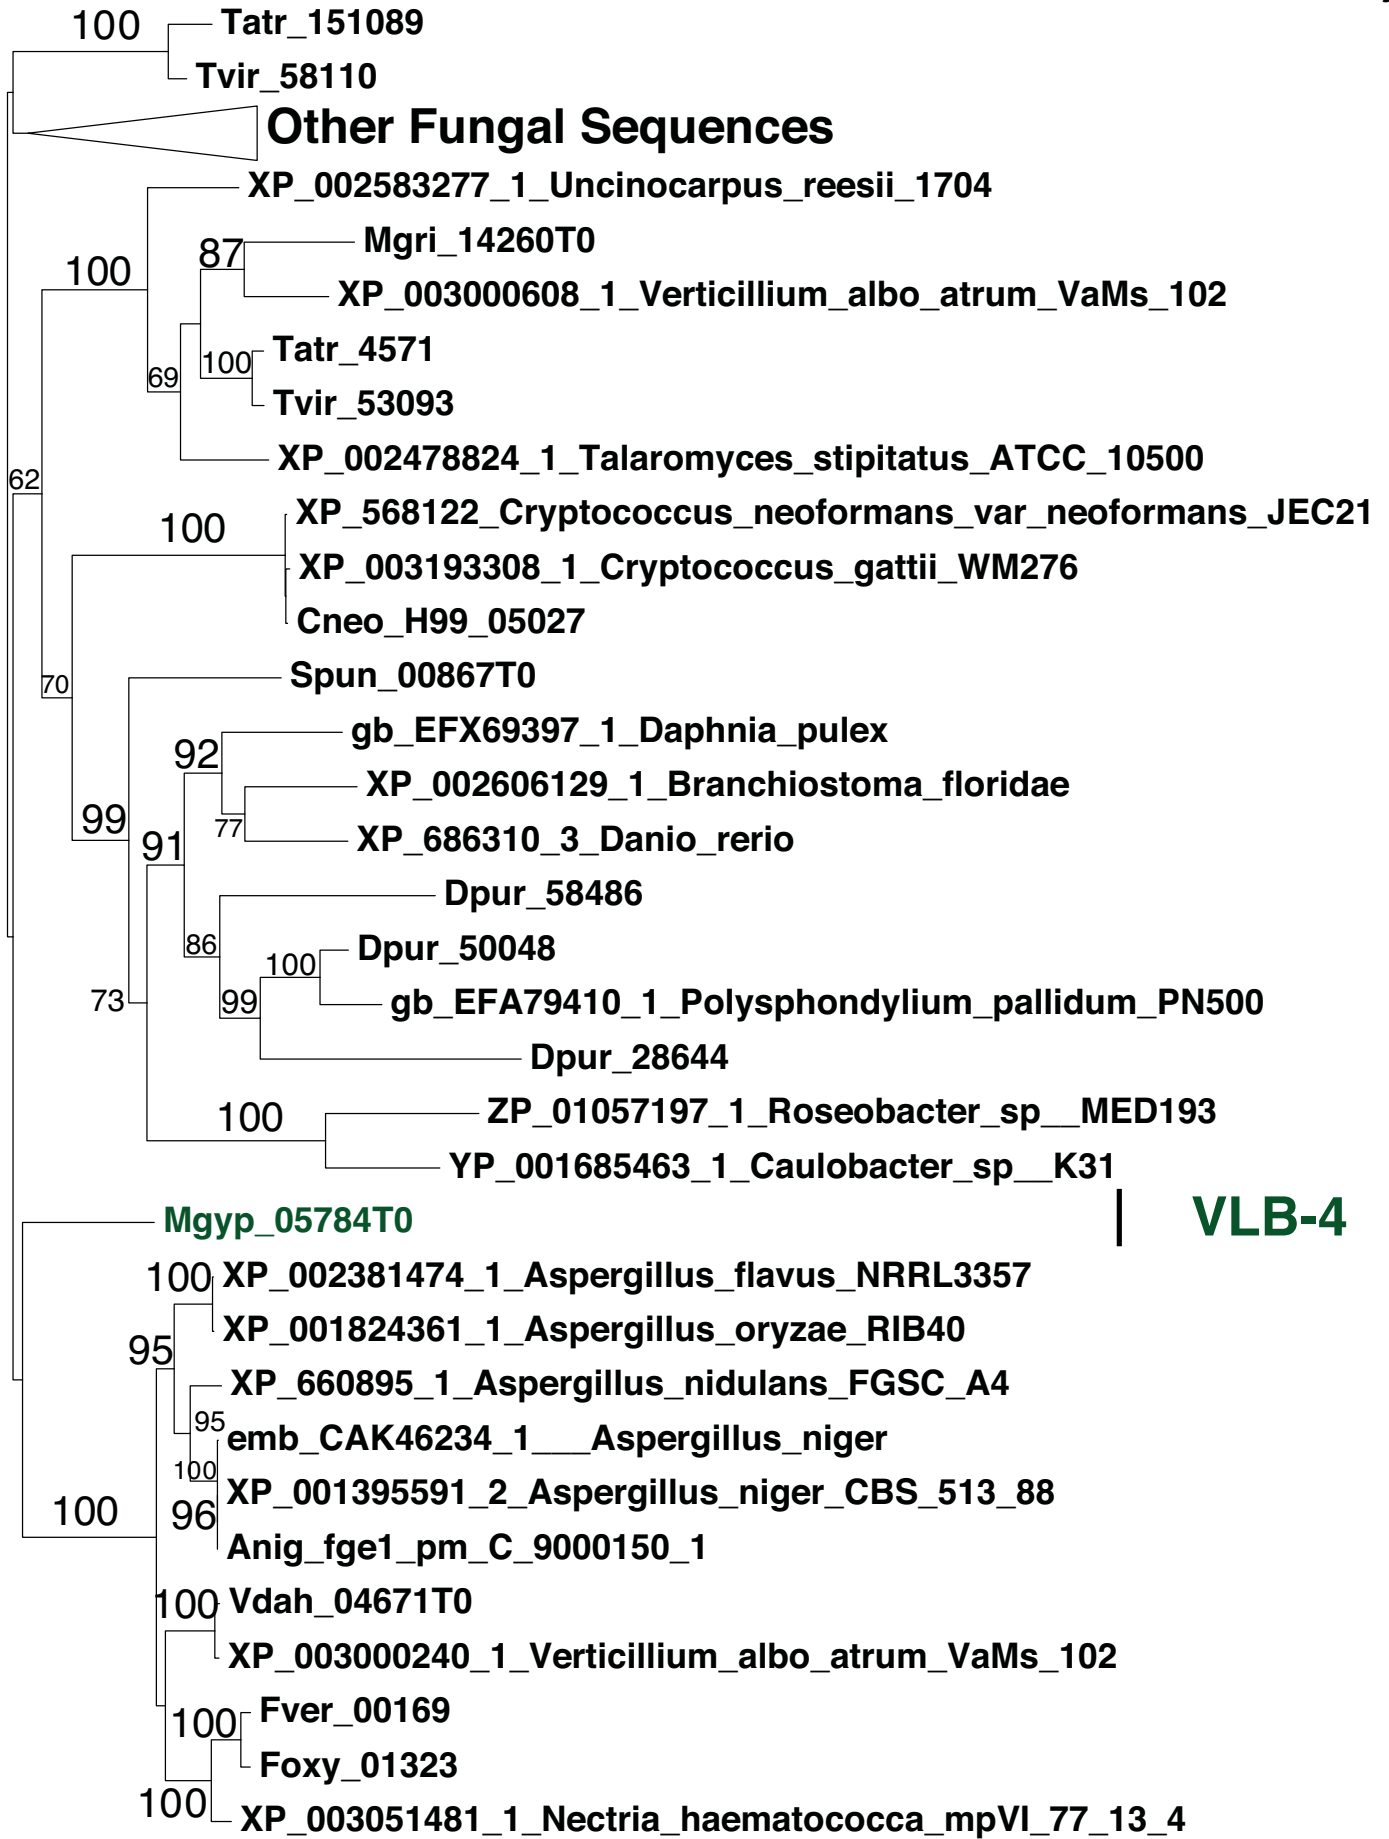

0.4

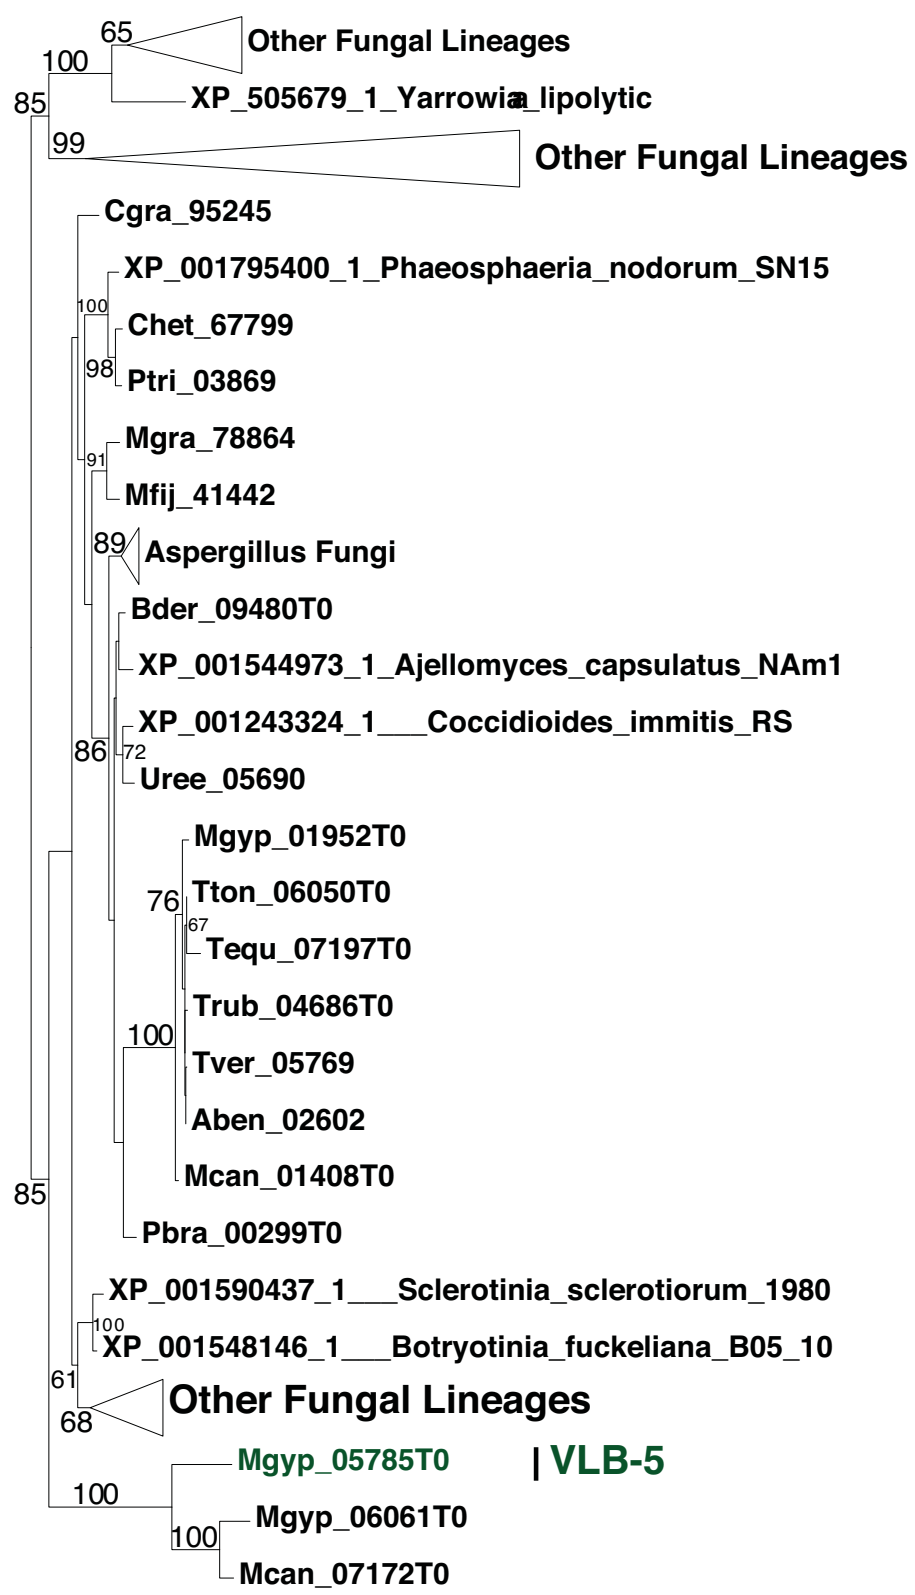

0.3

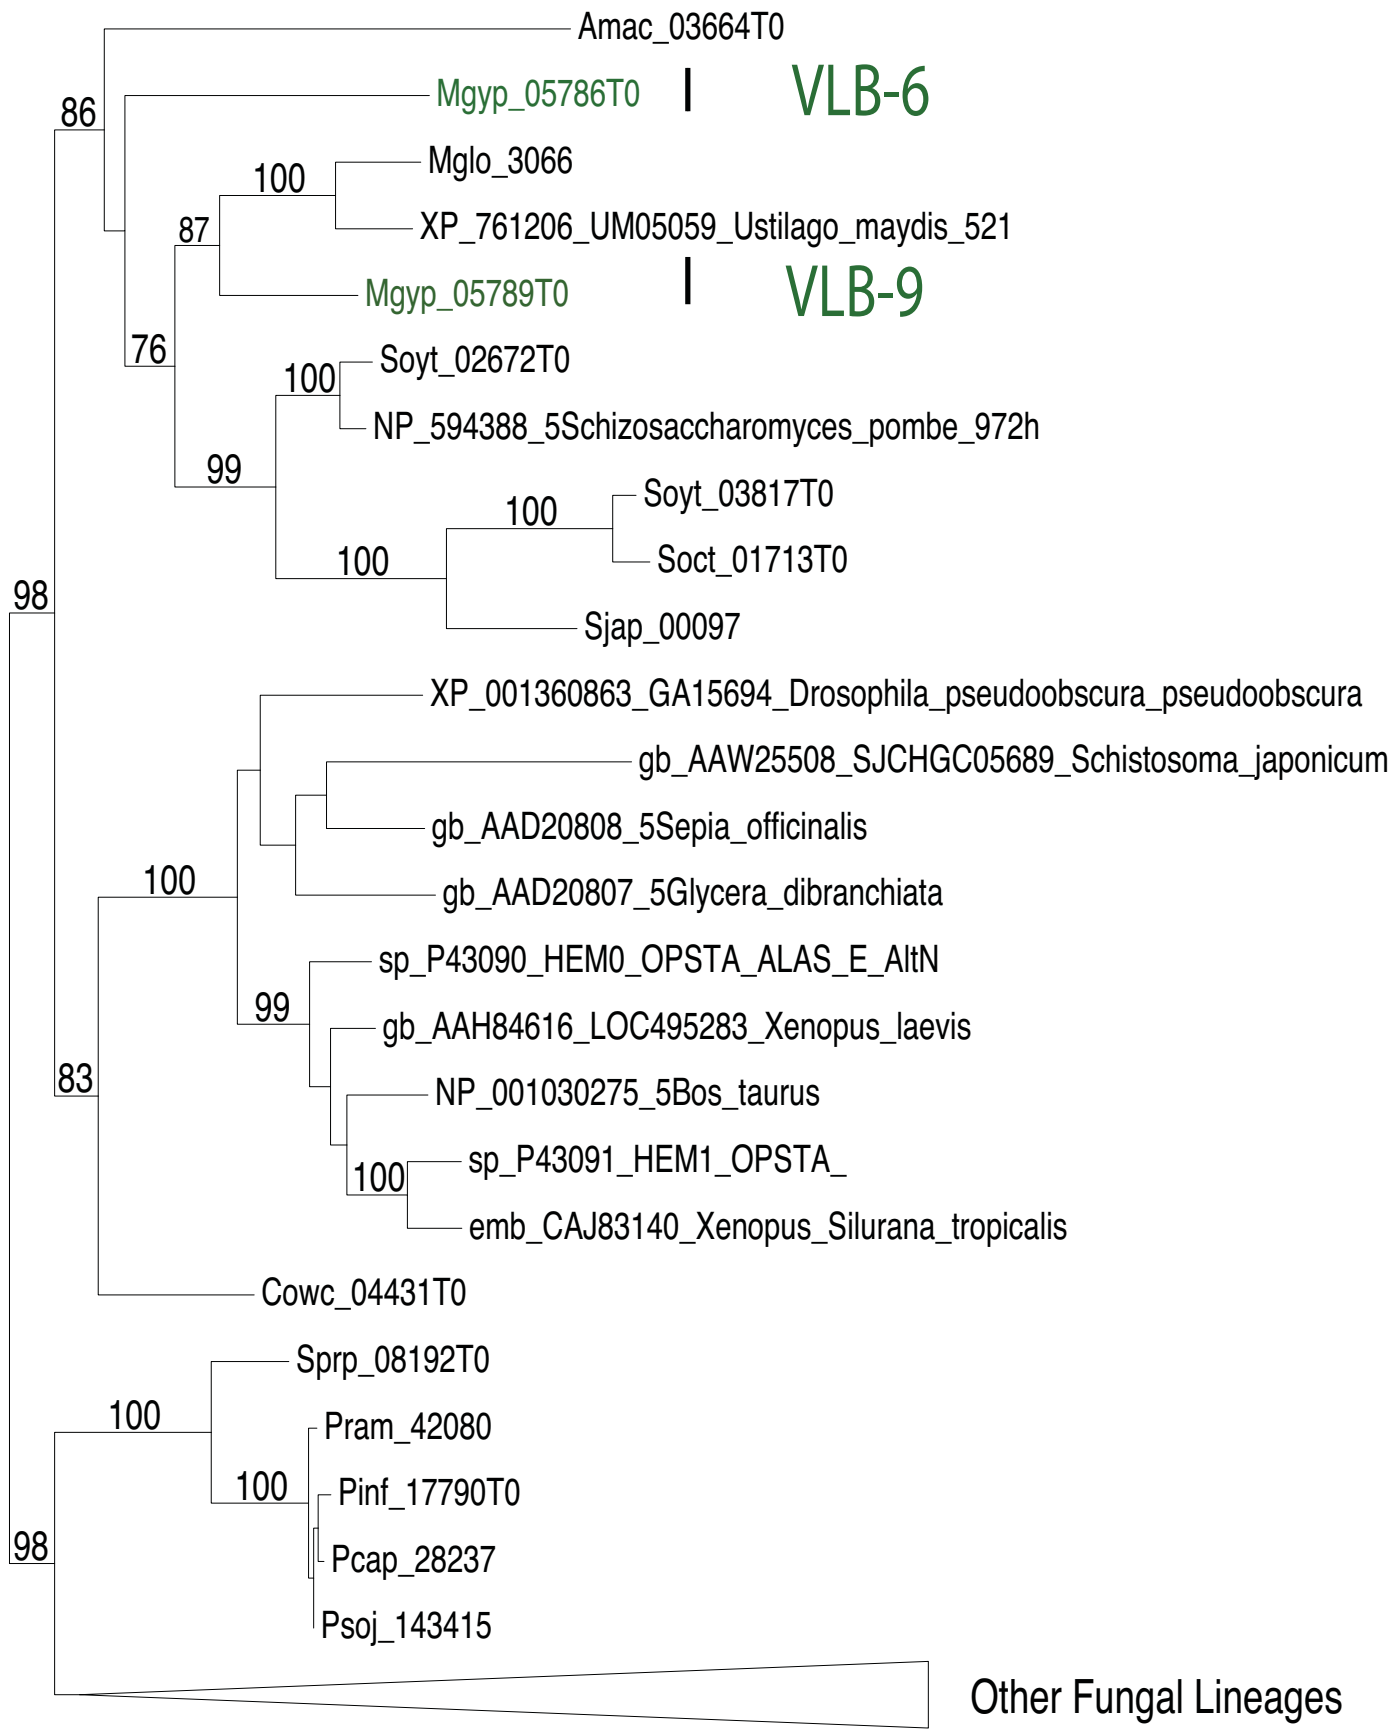

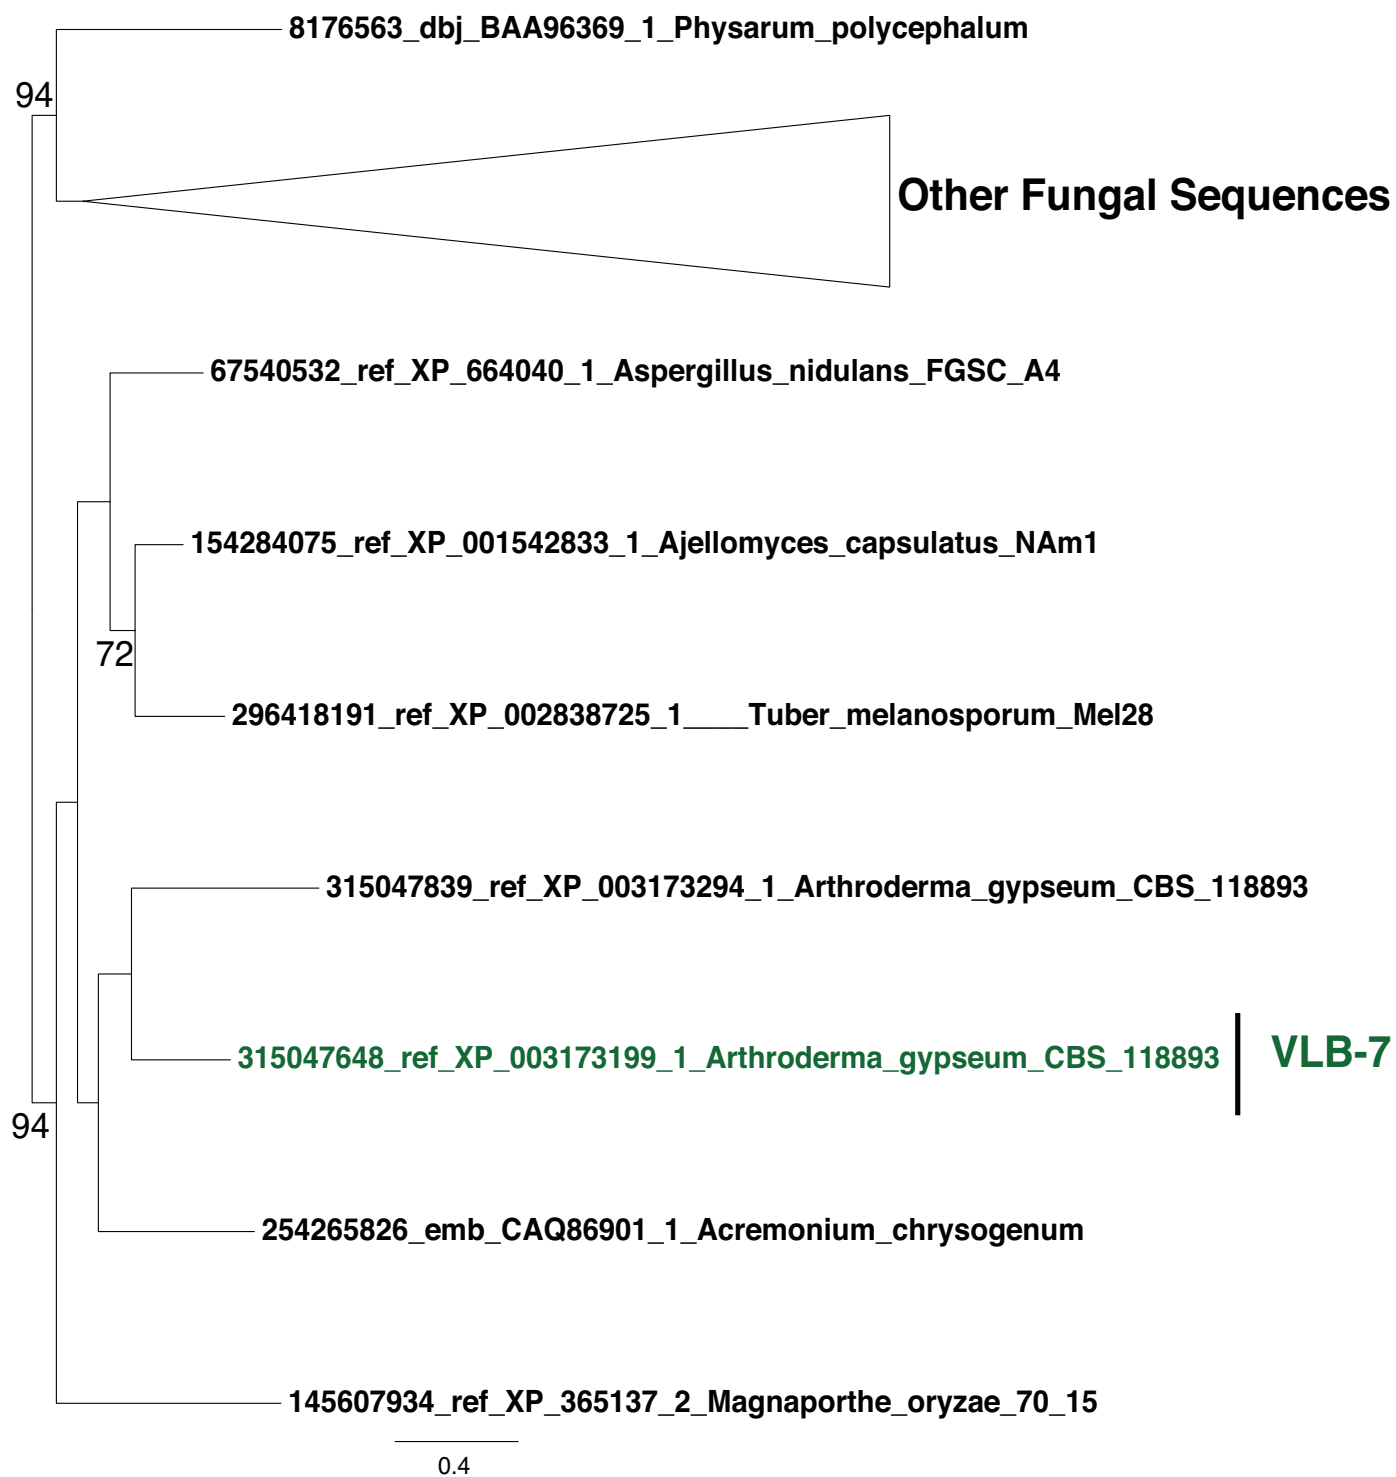

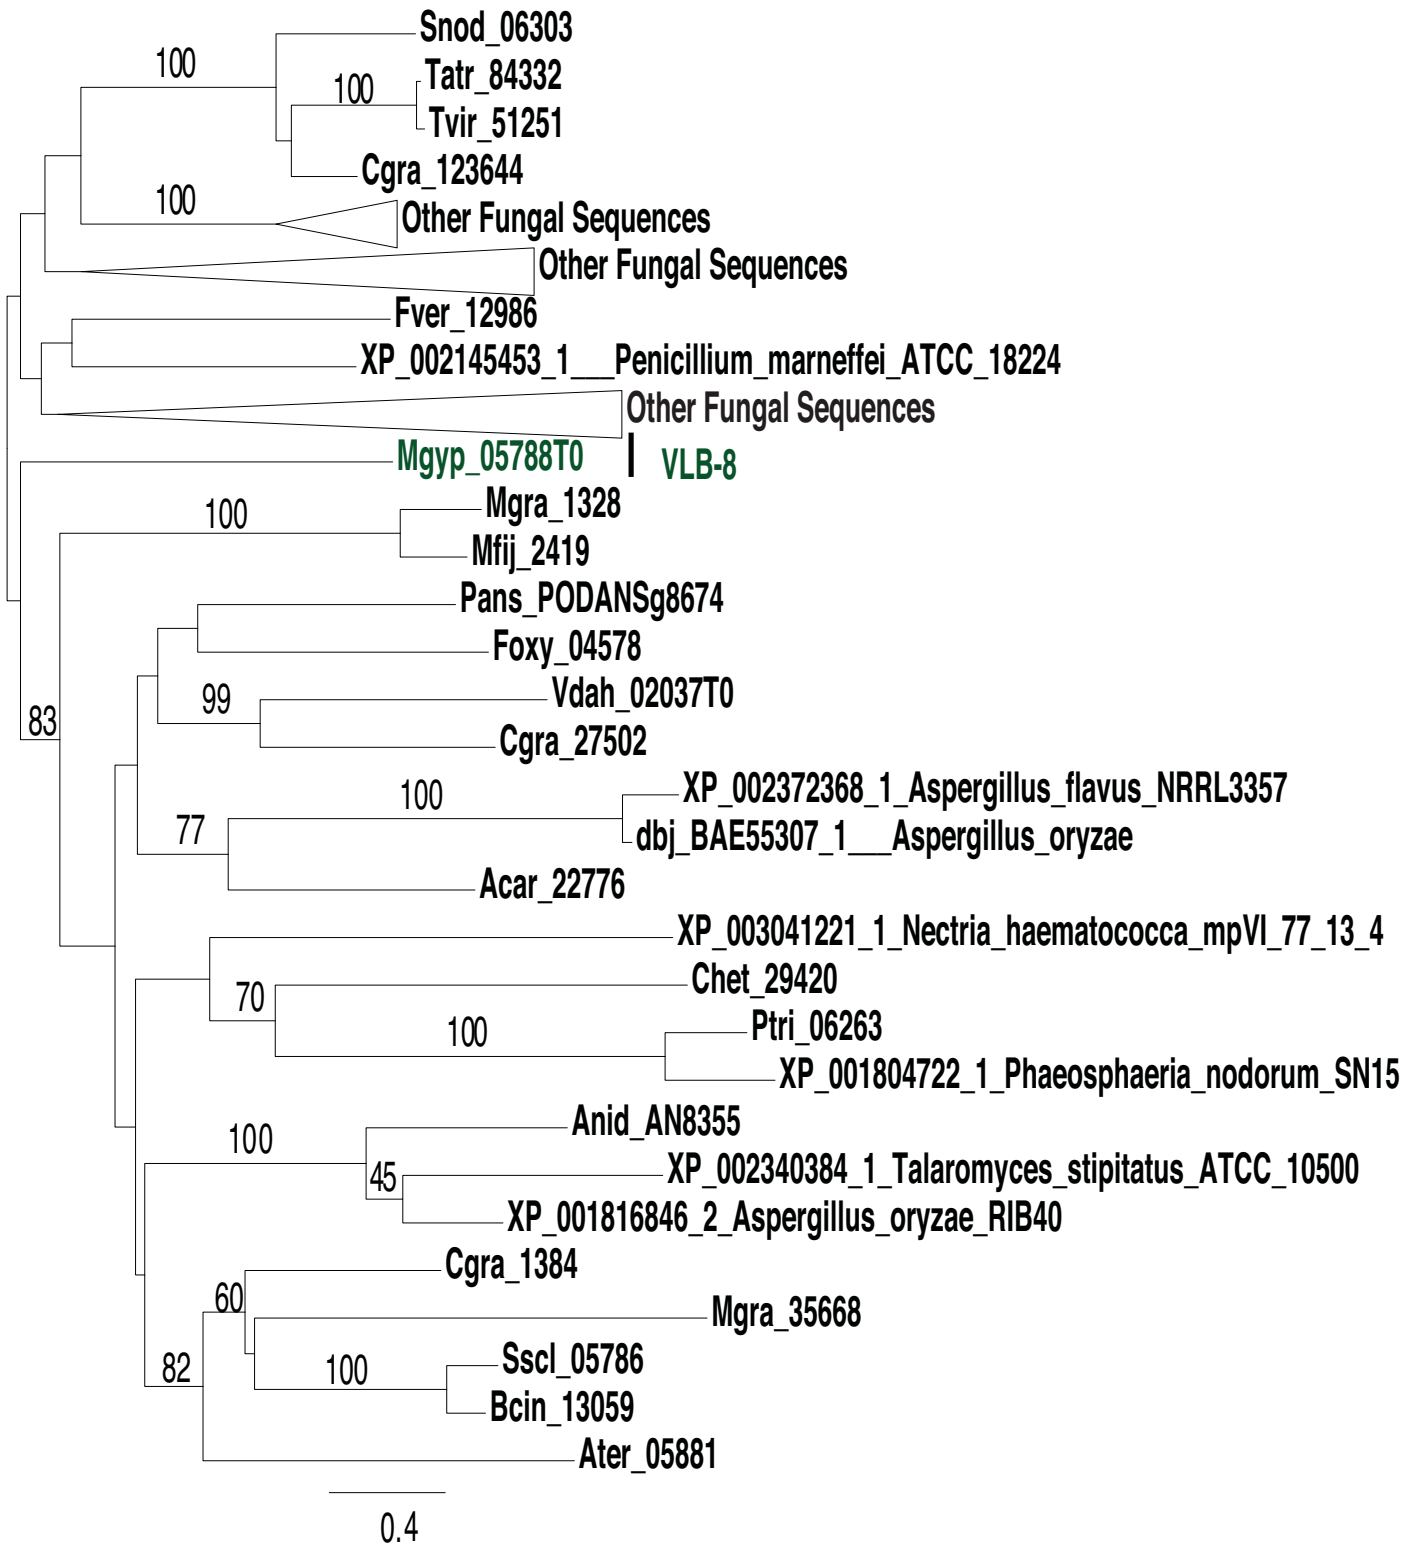

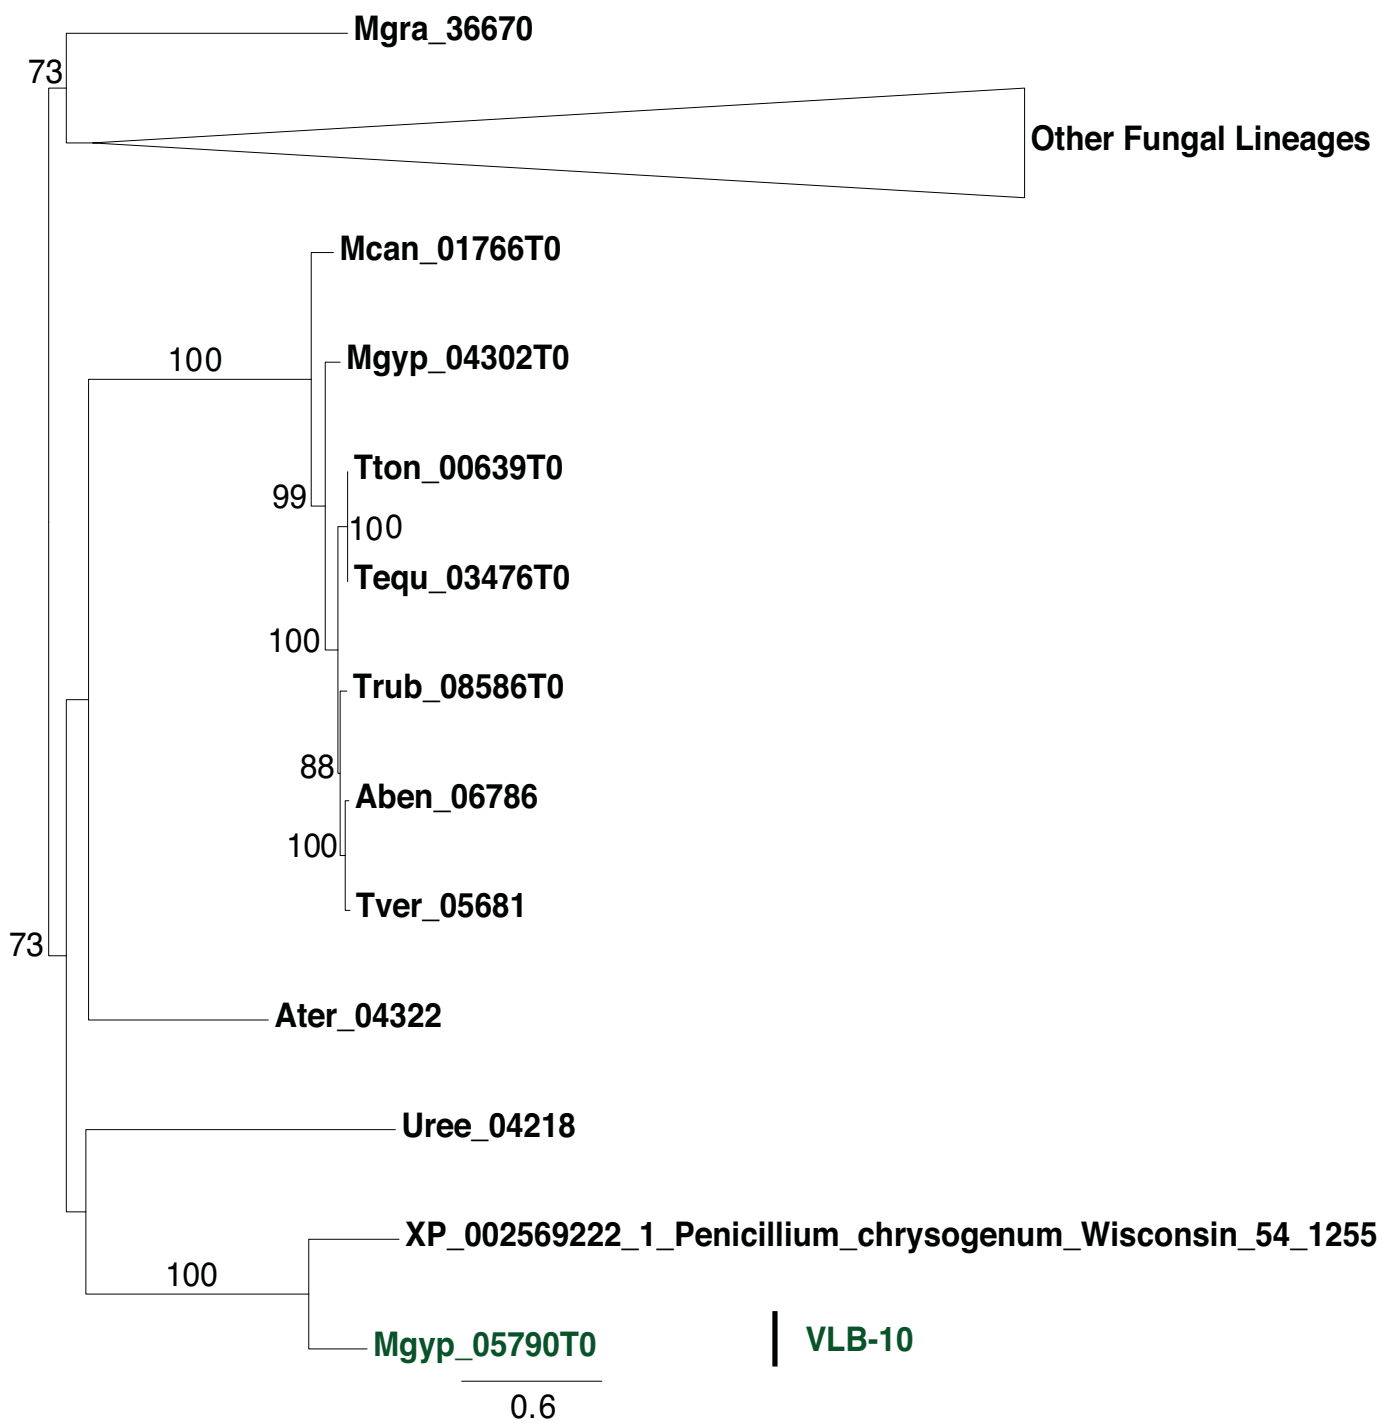

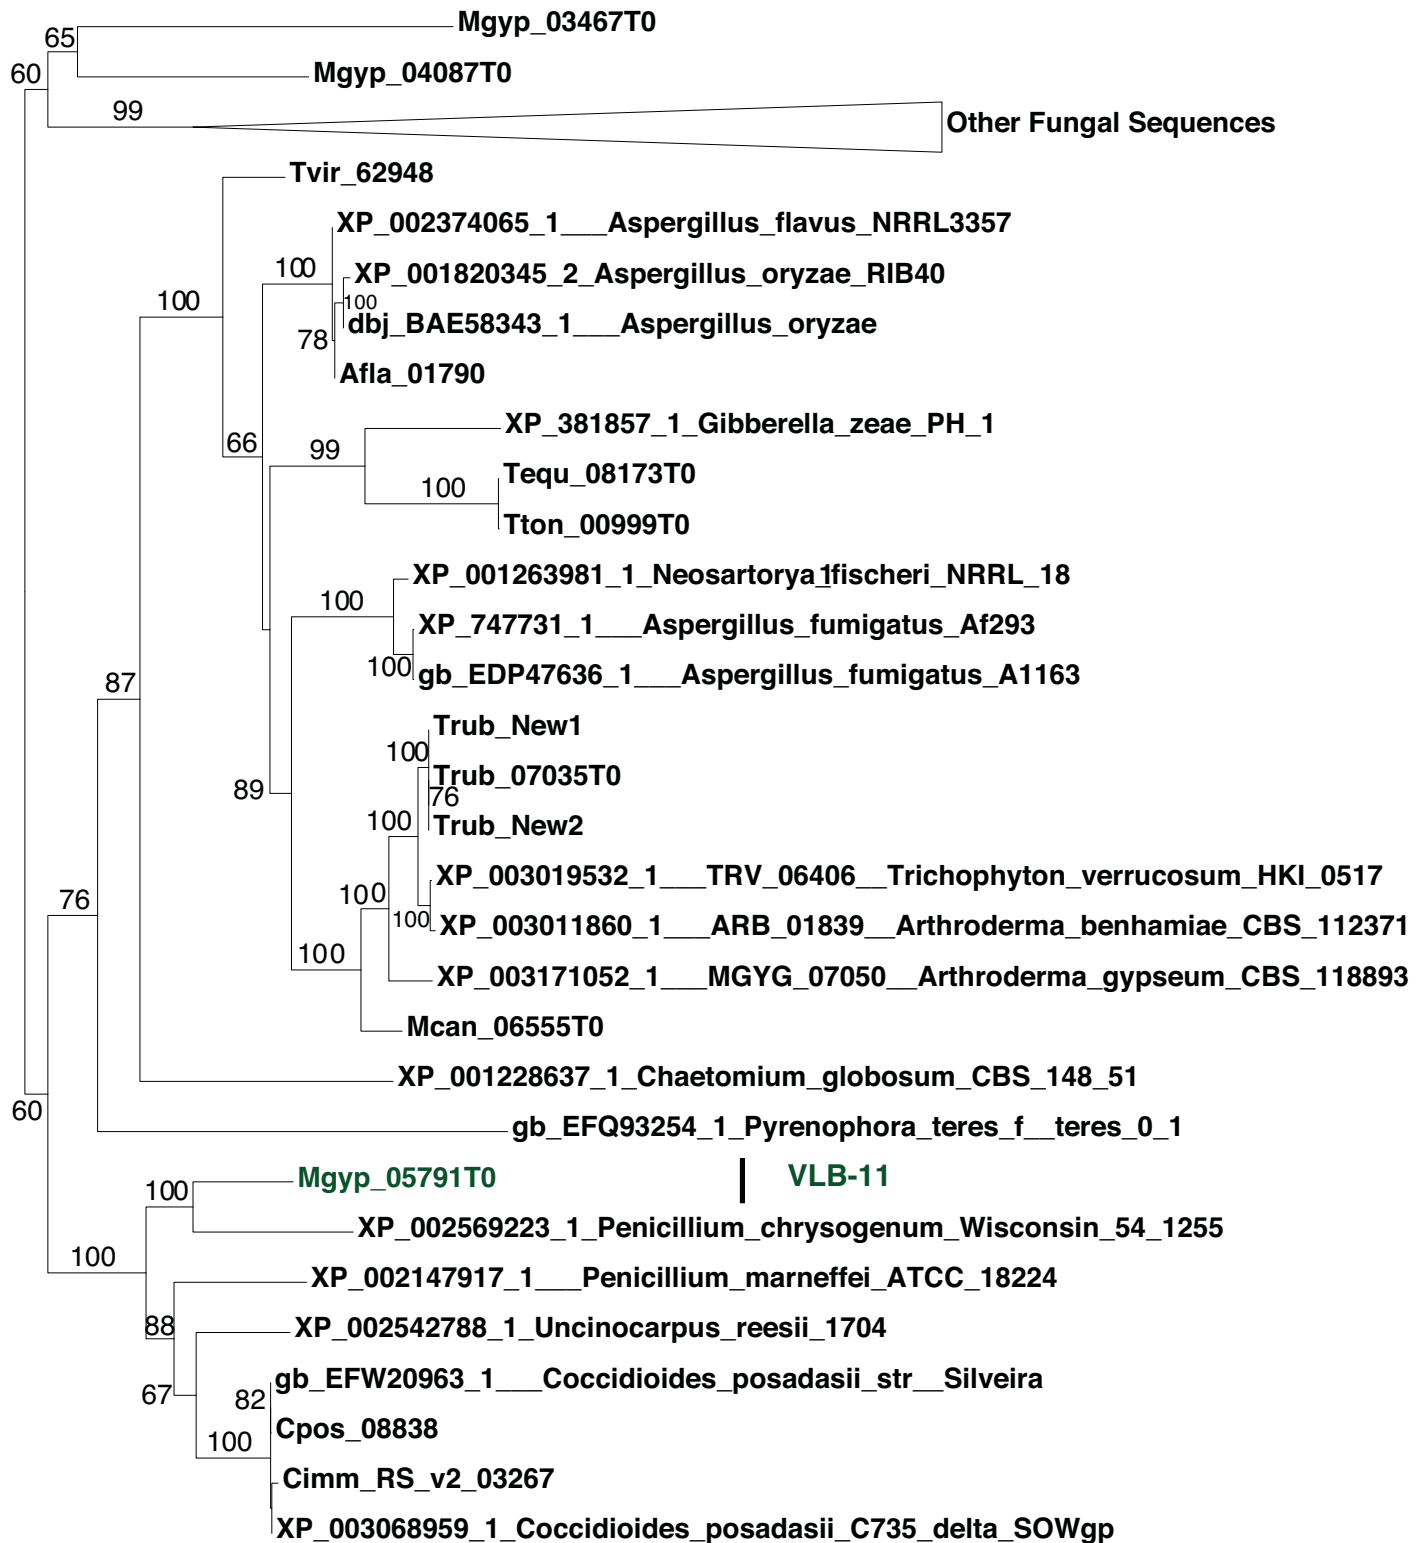

0.3



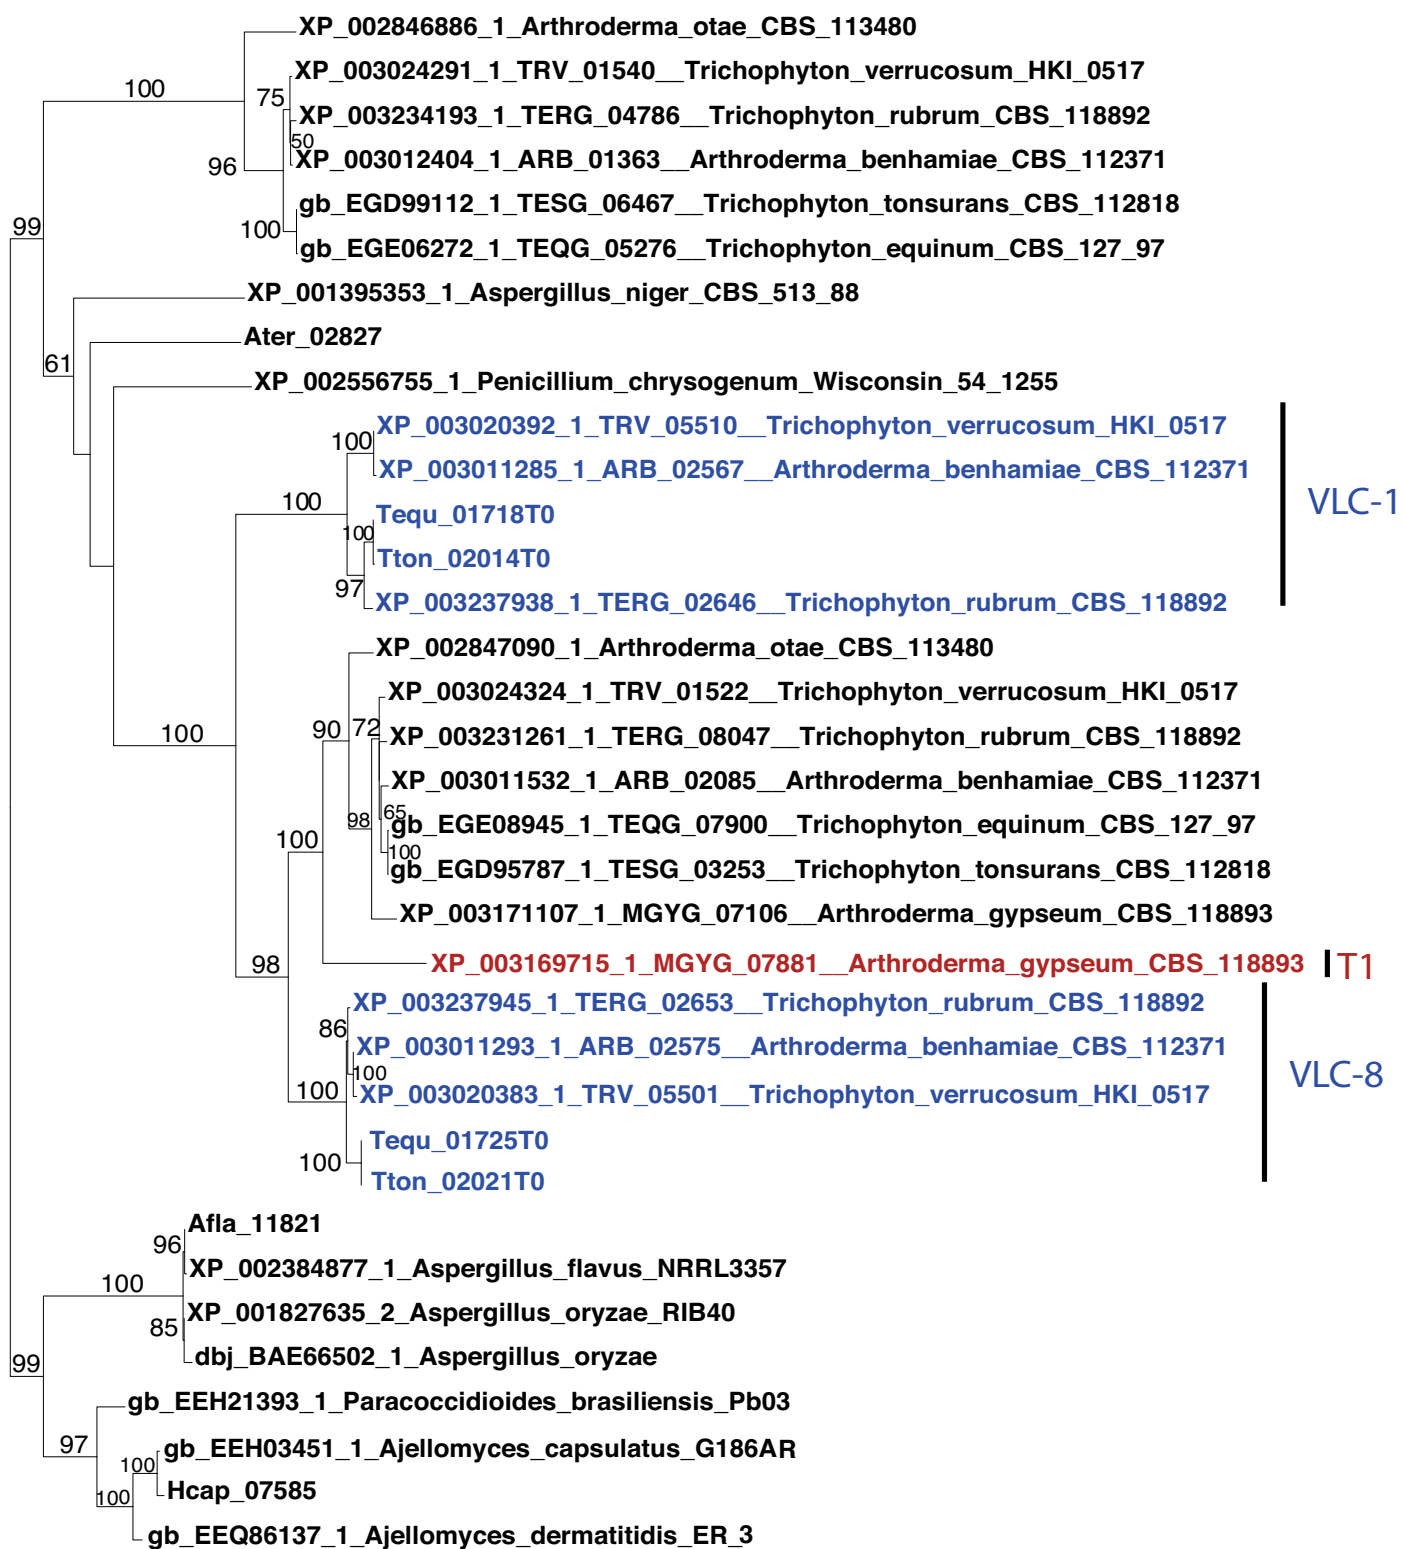

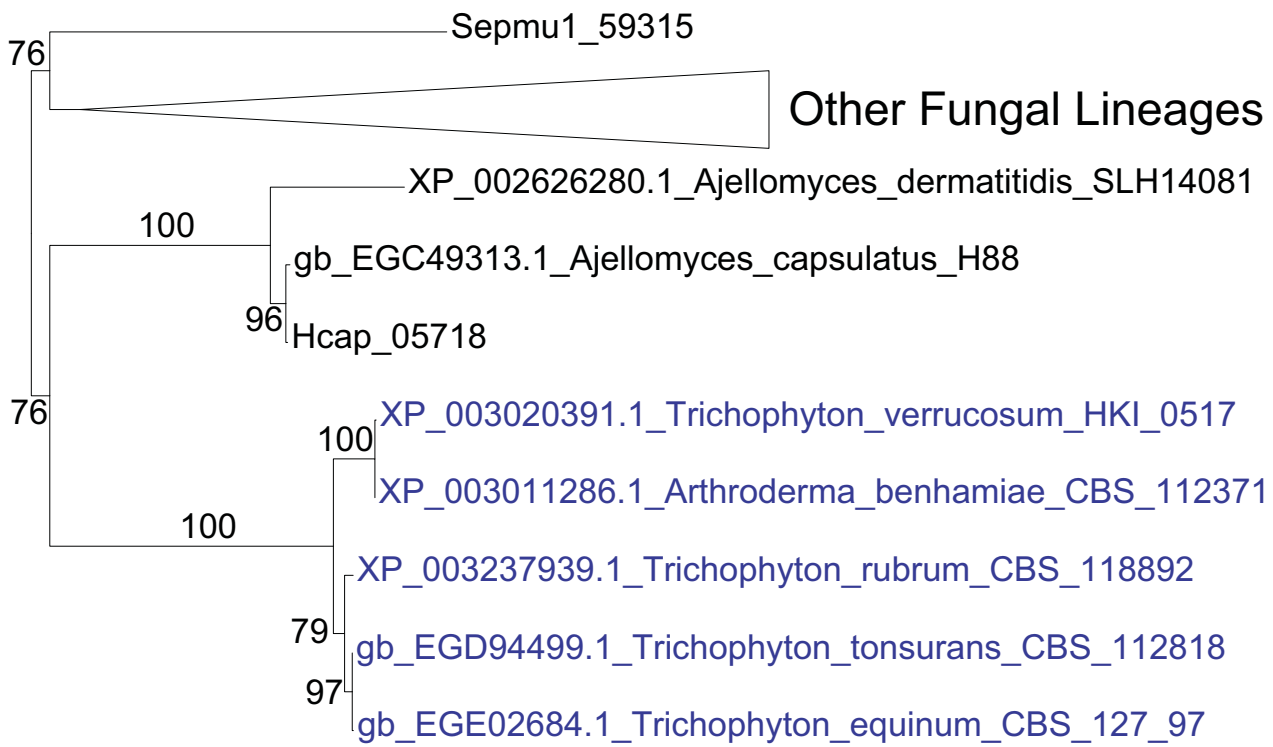

0.4

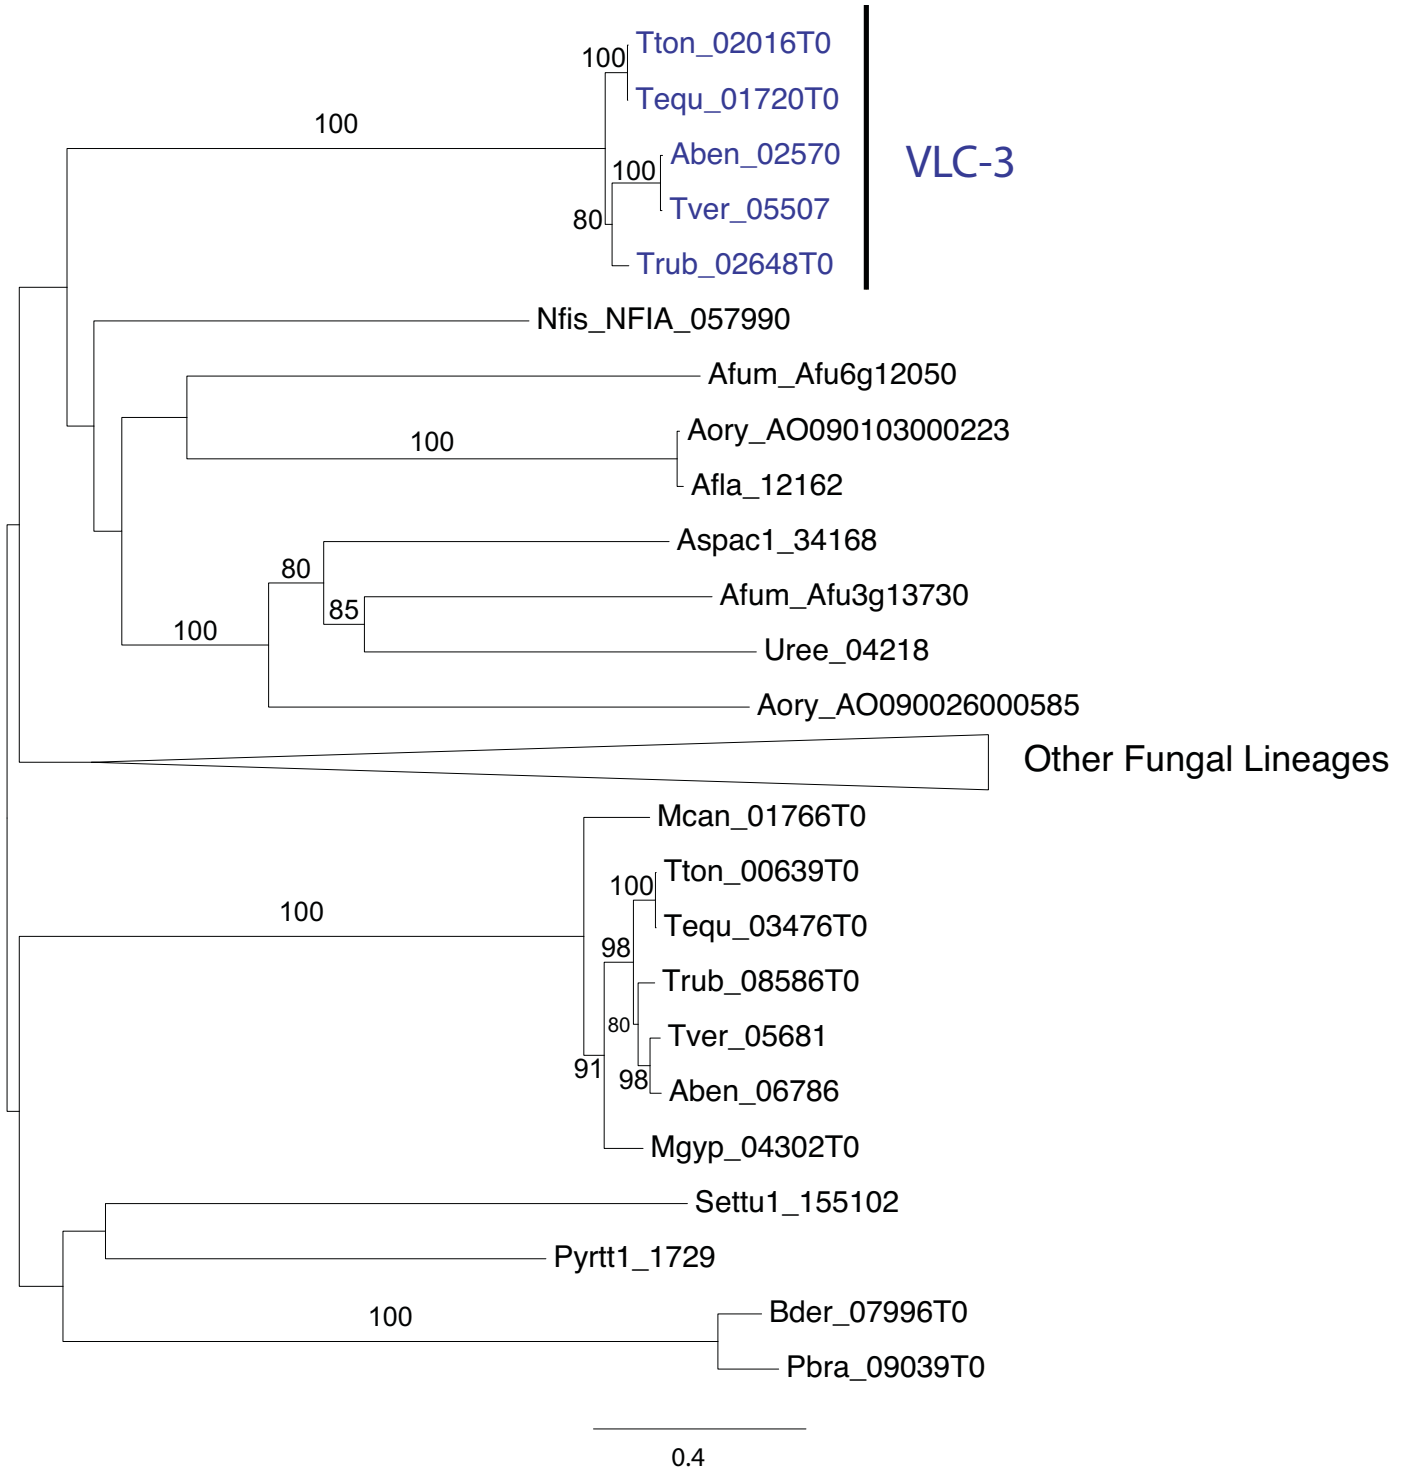

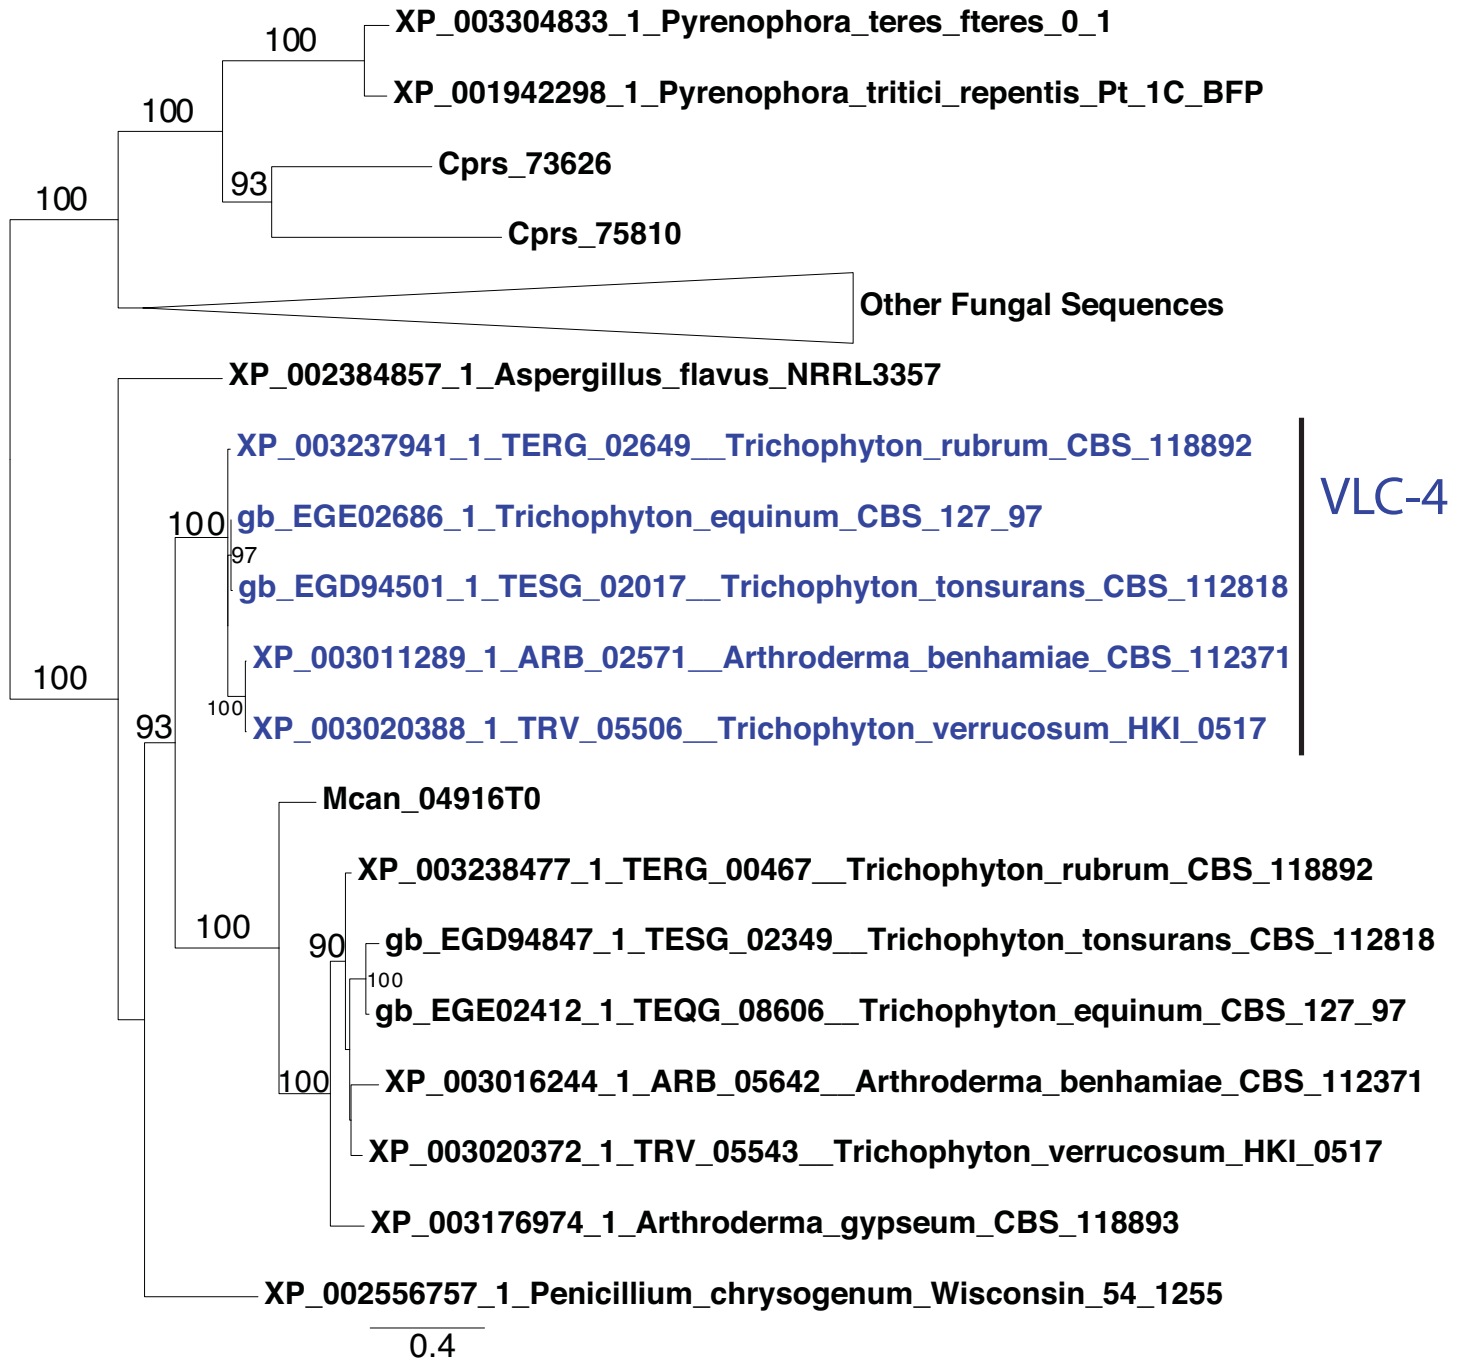

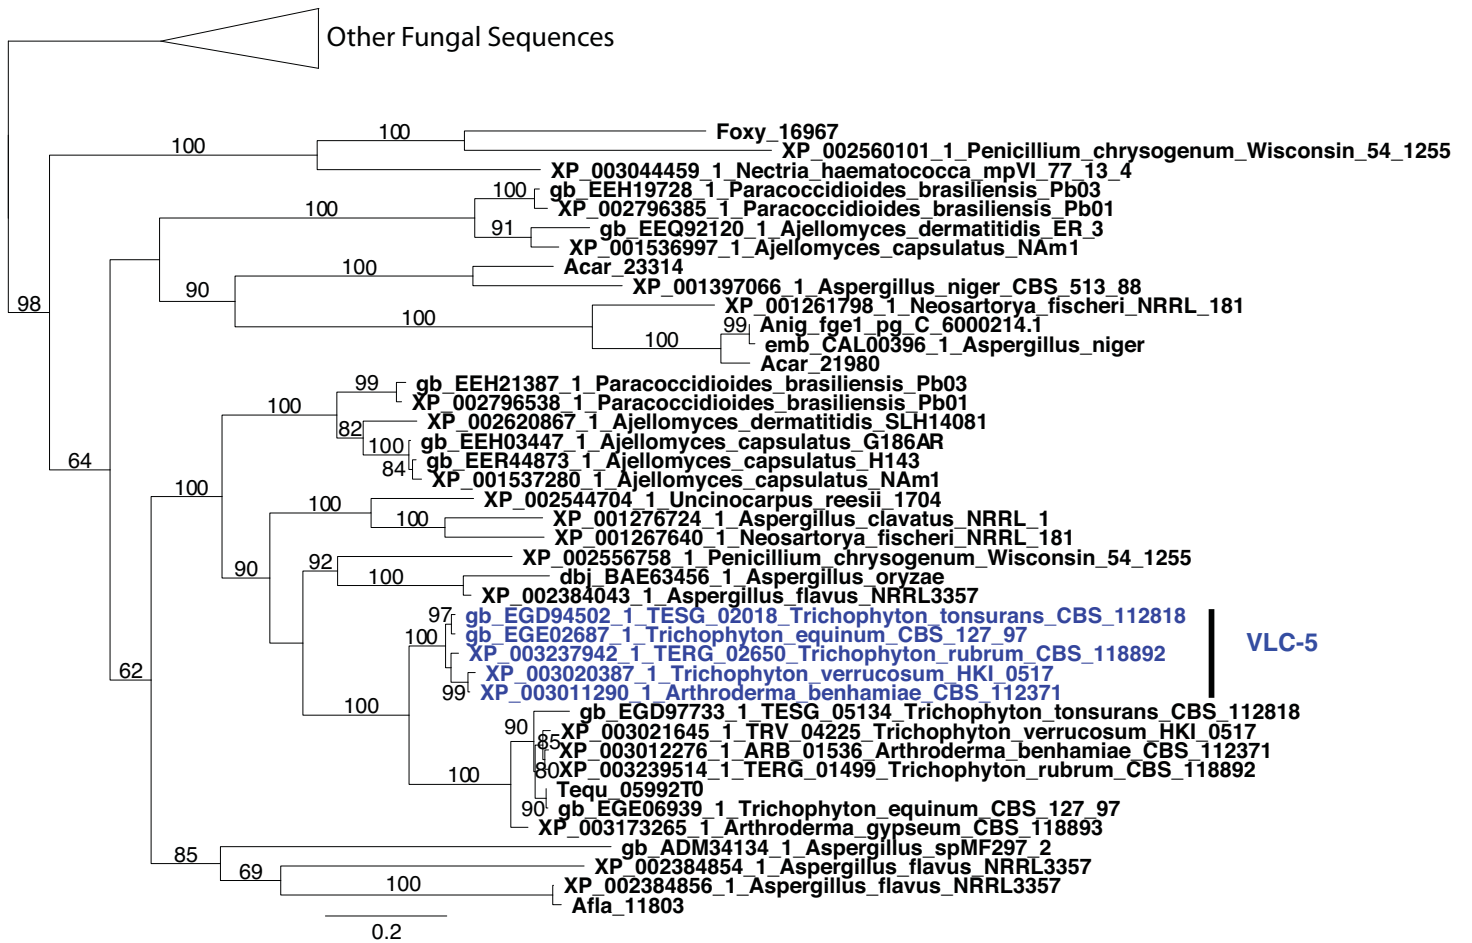

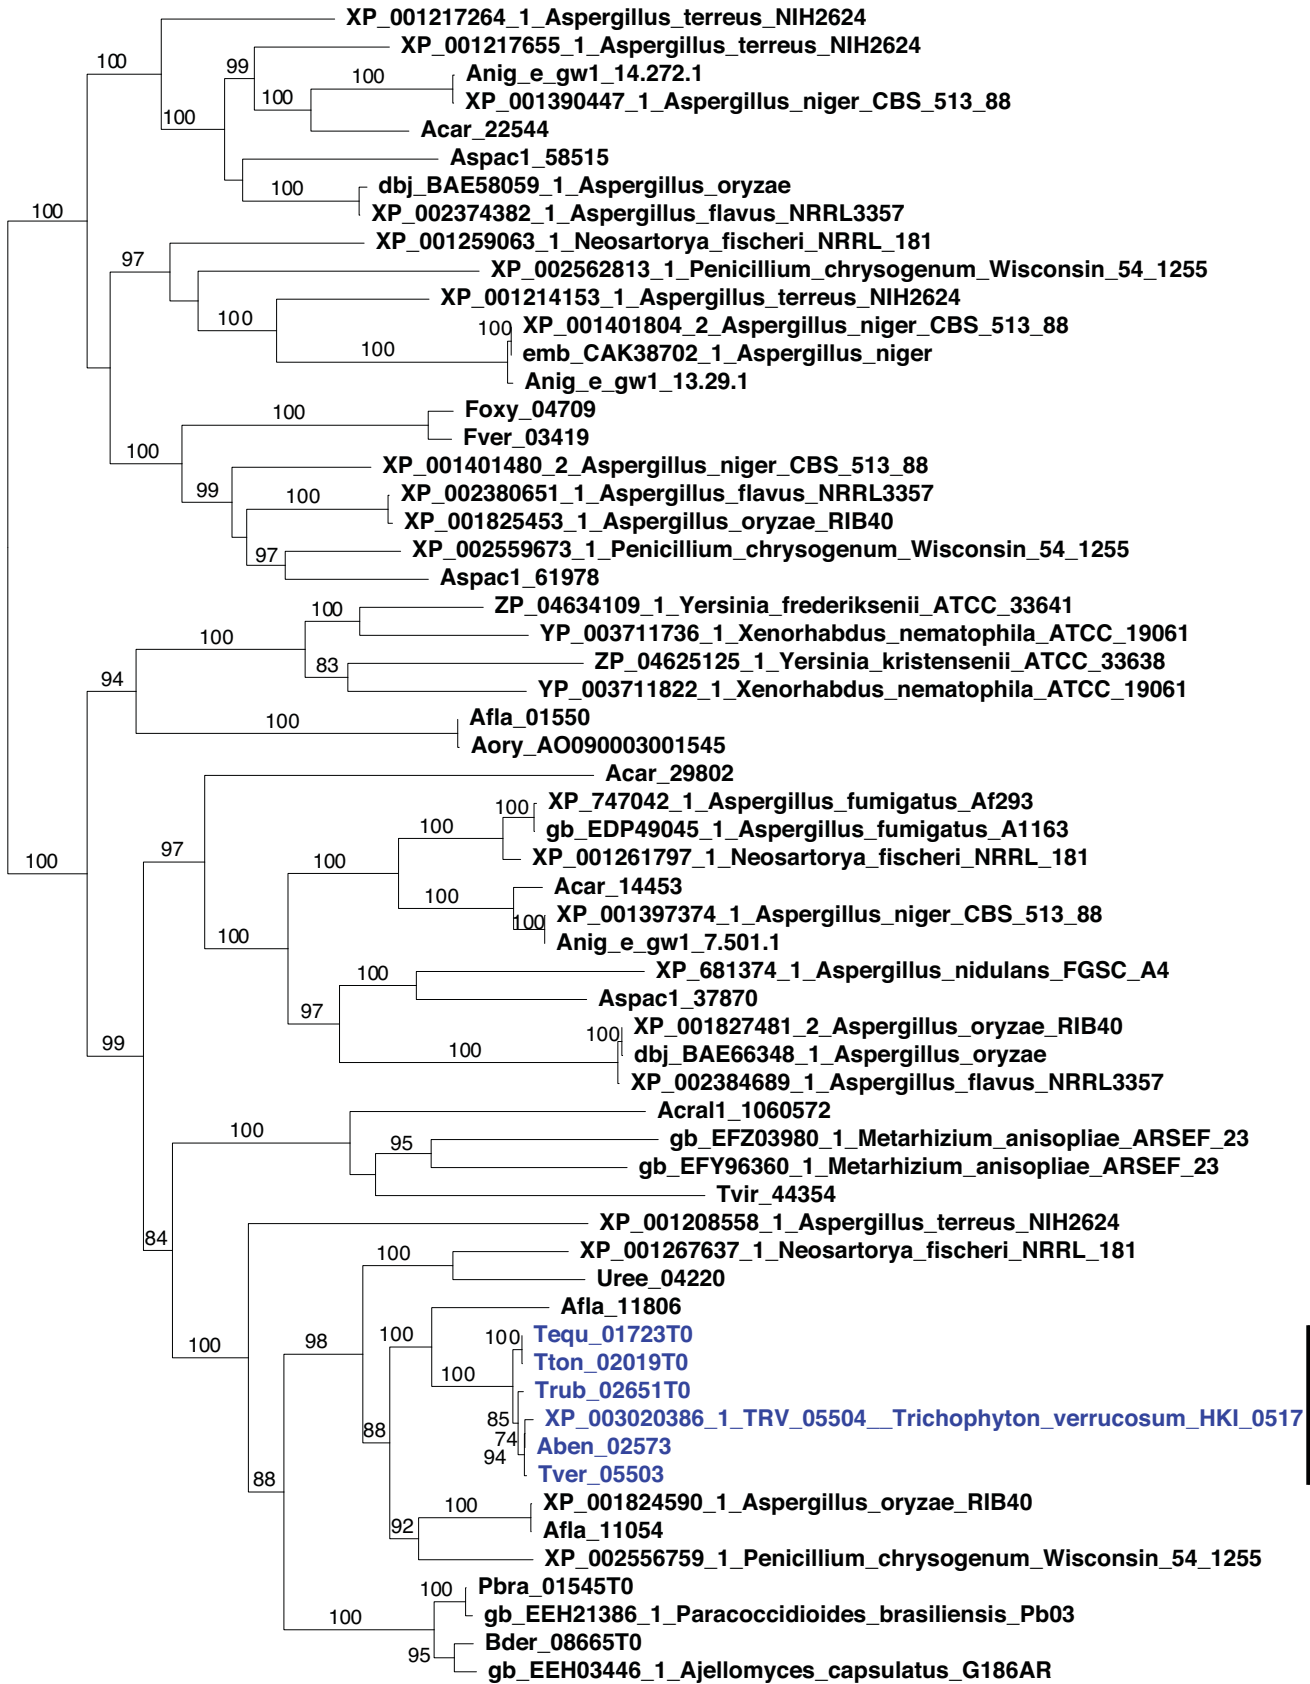

VLC-6

0.3

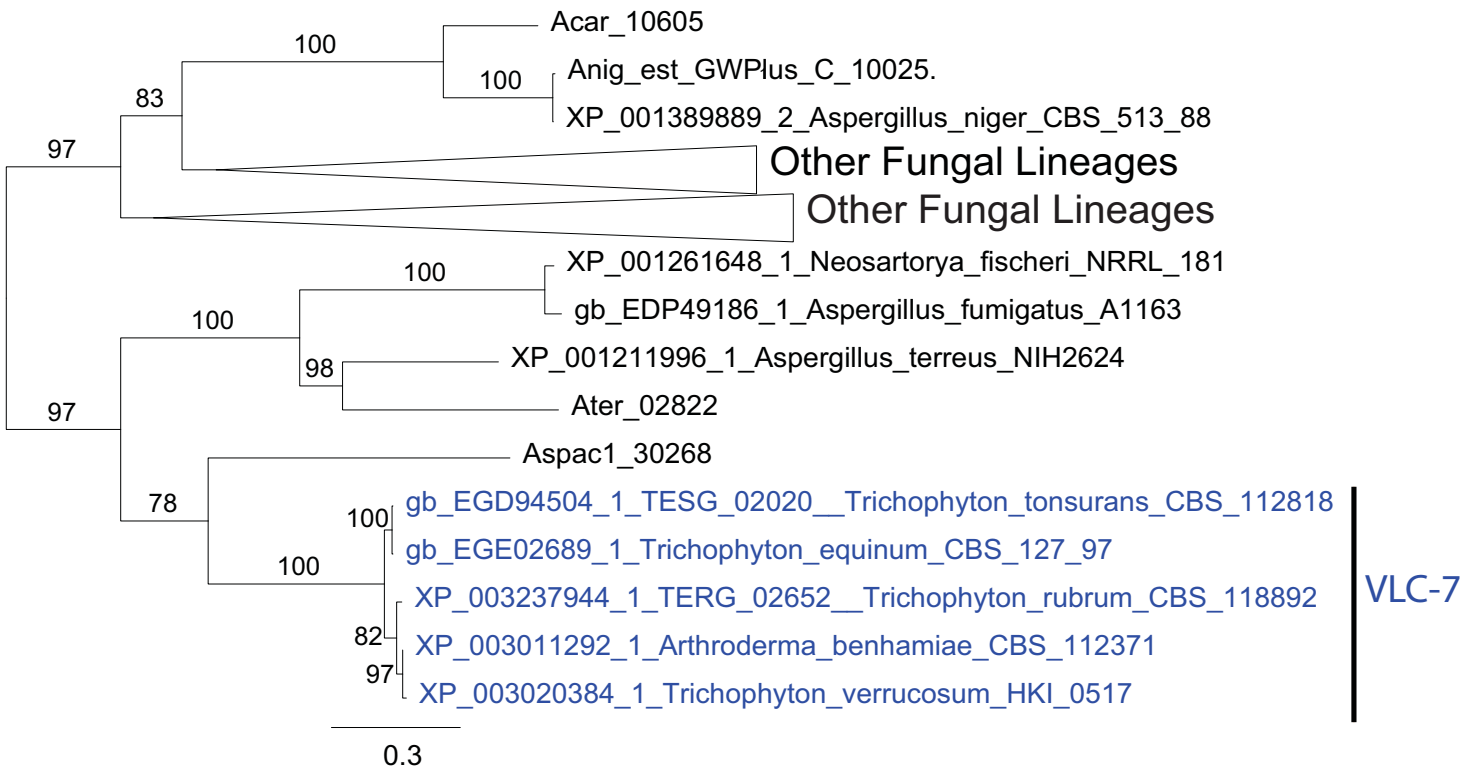

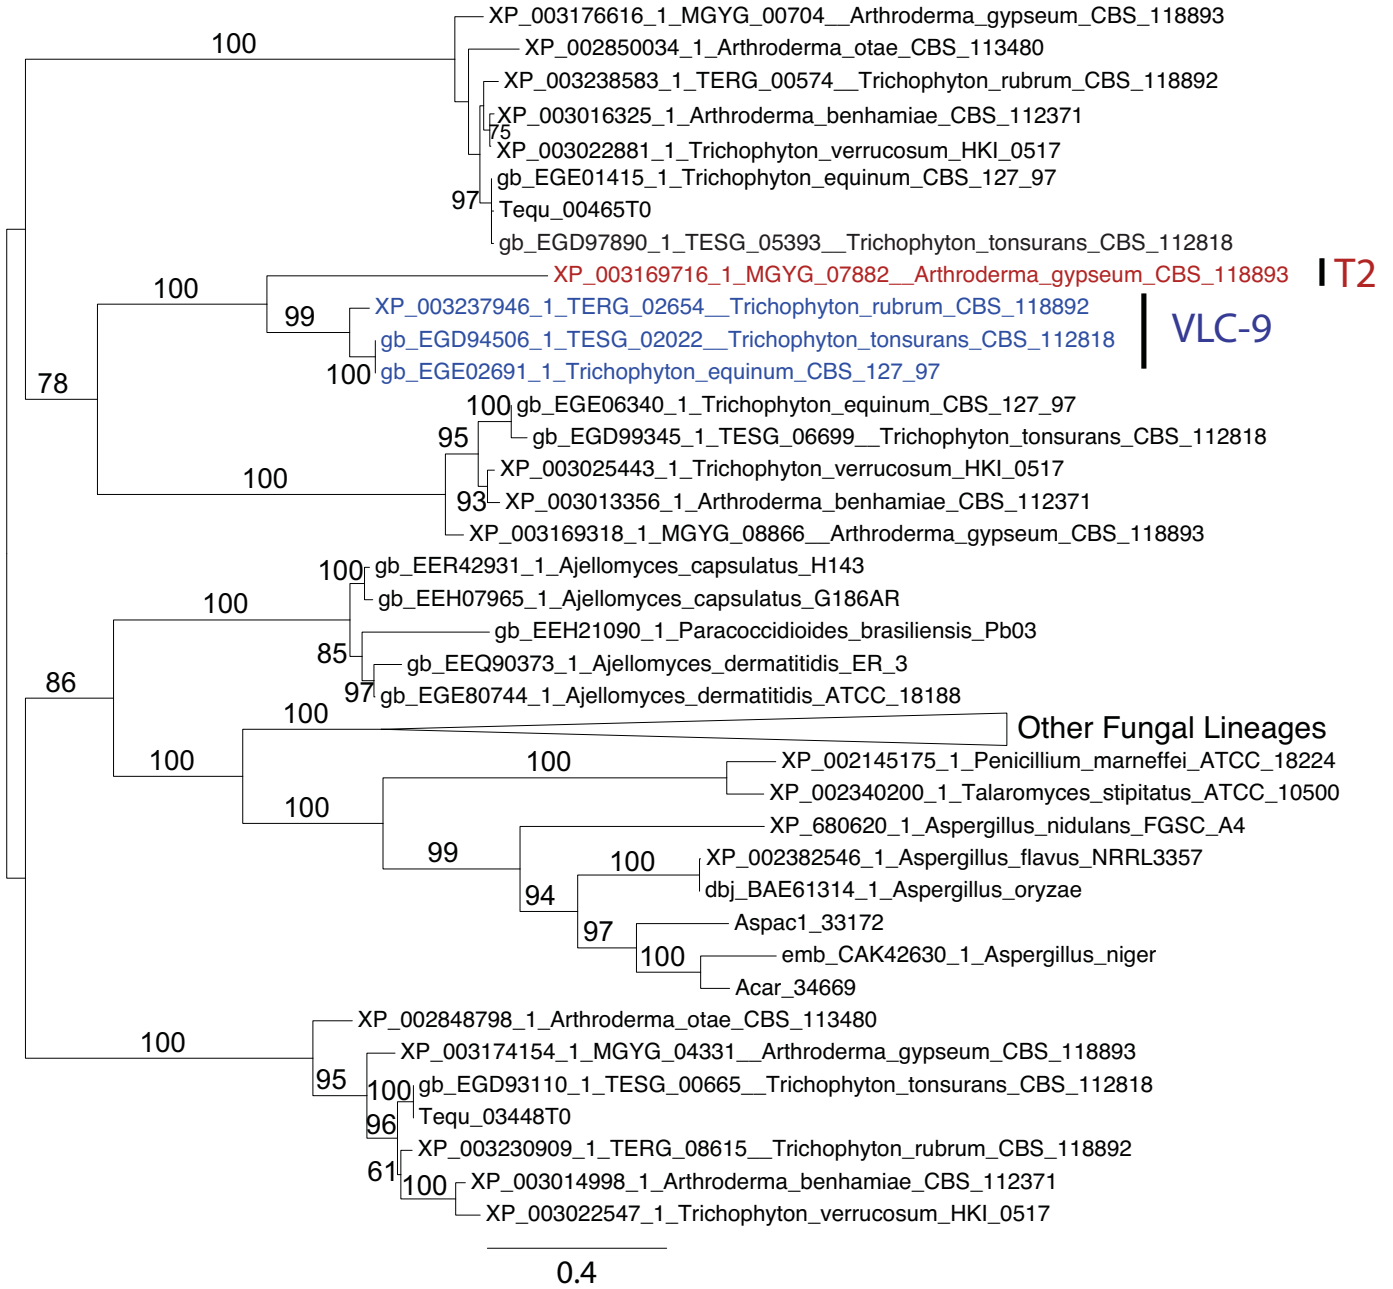



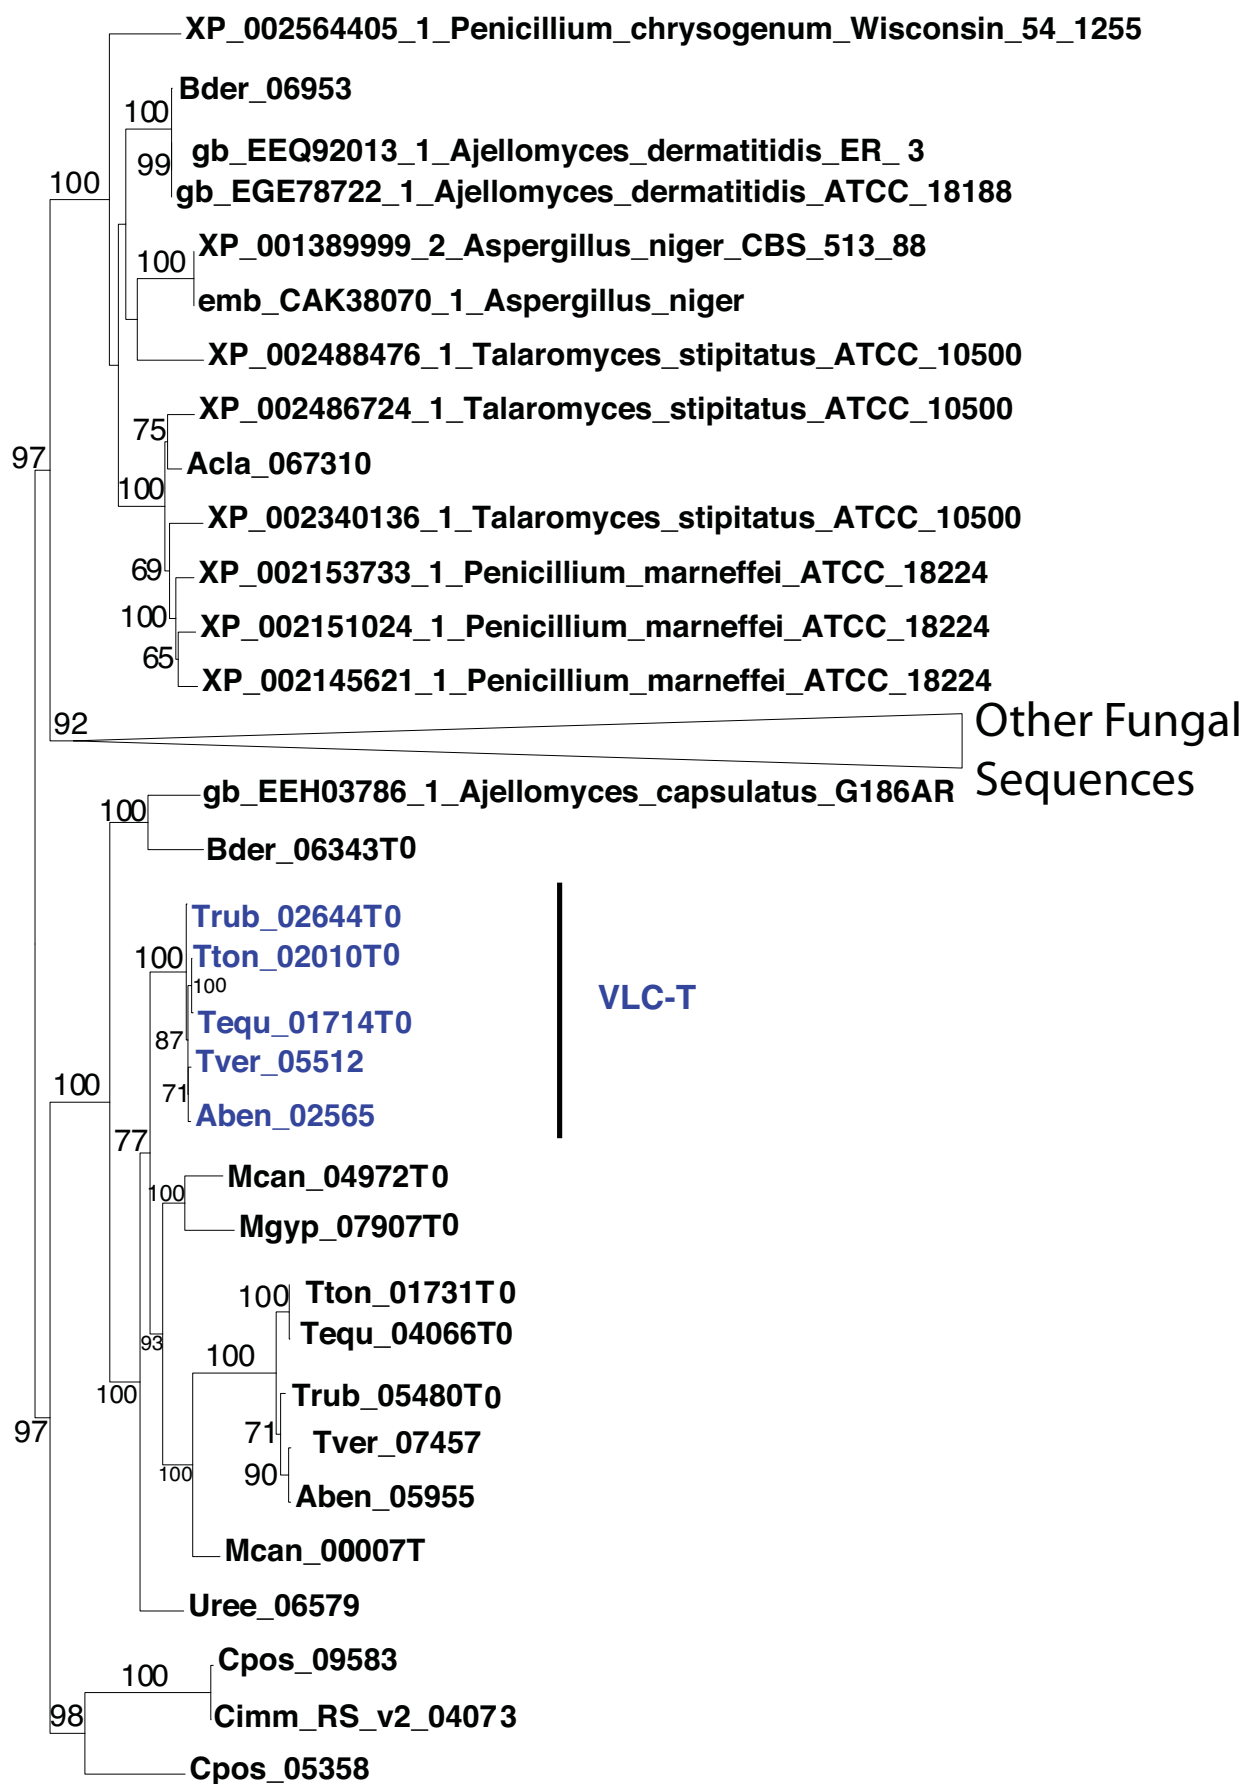

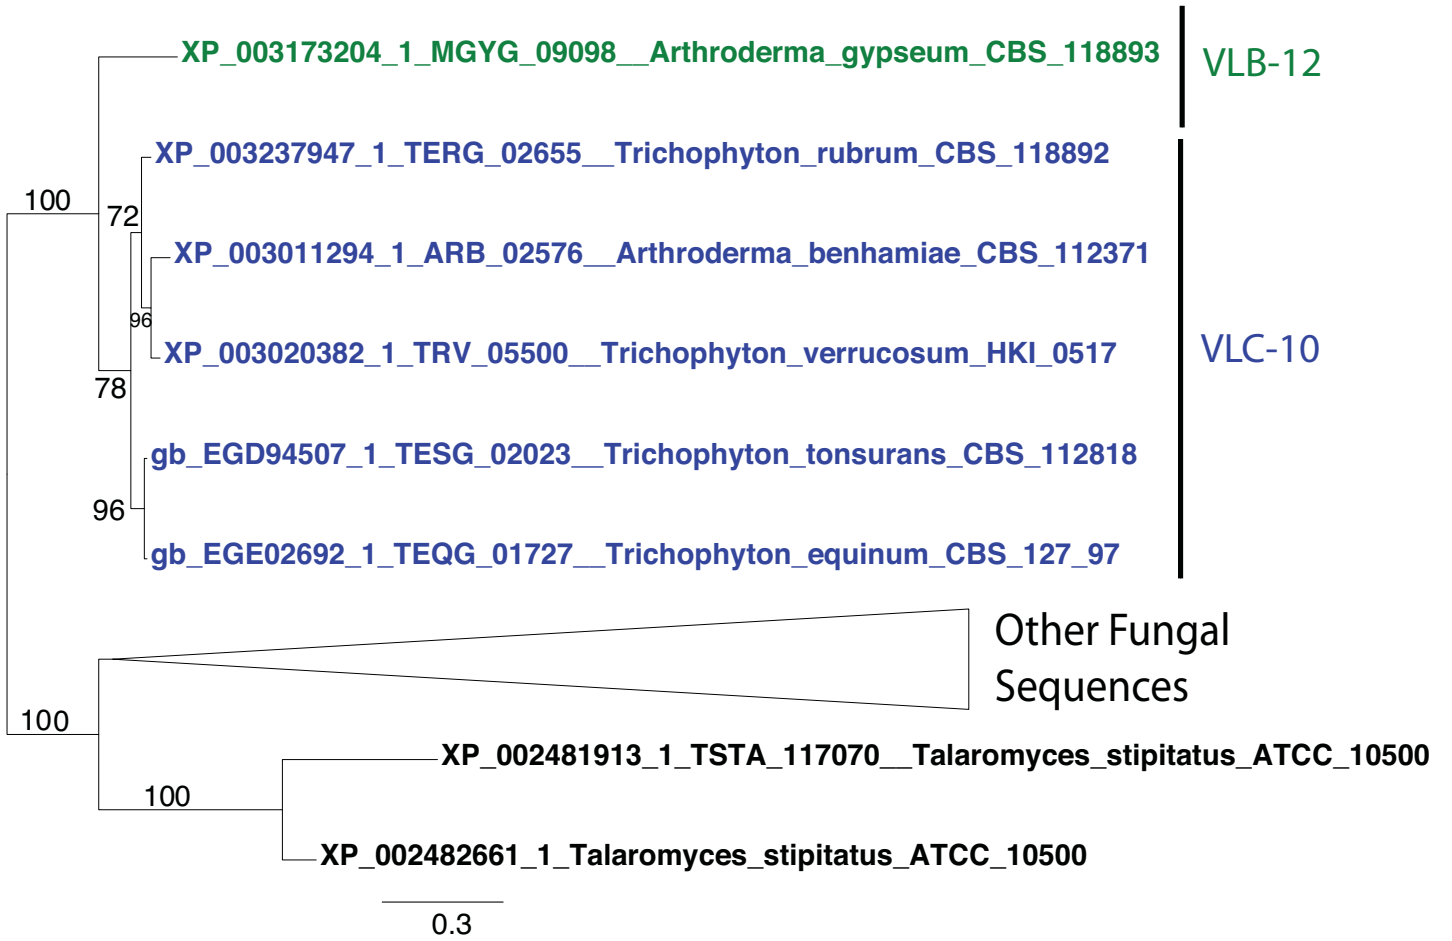

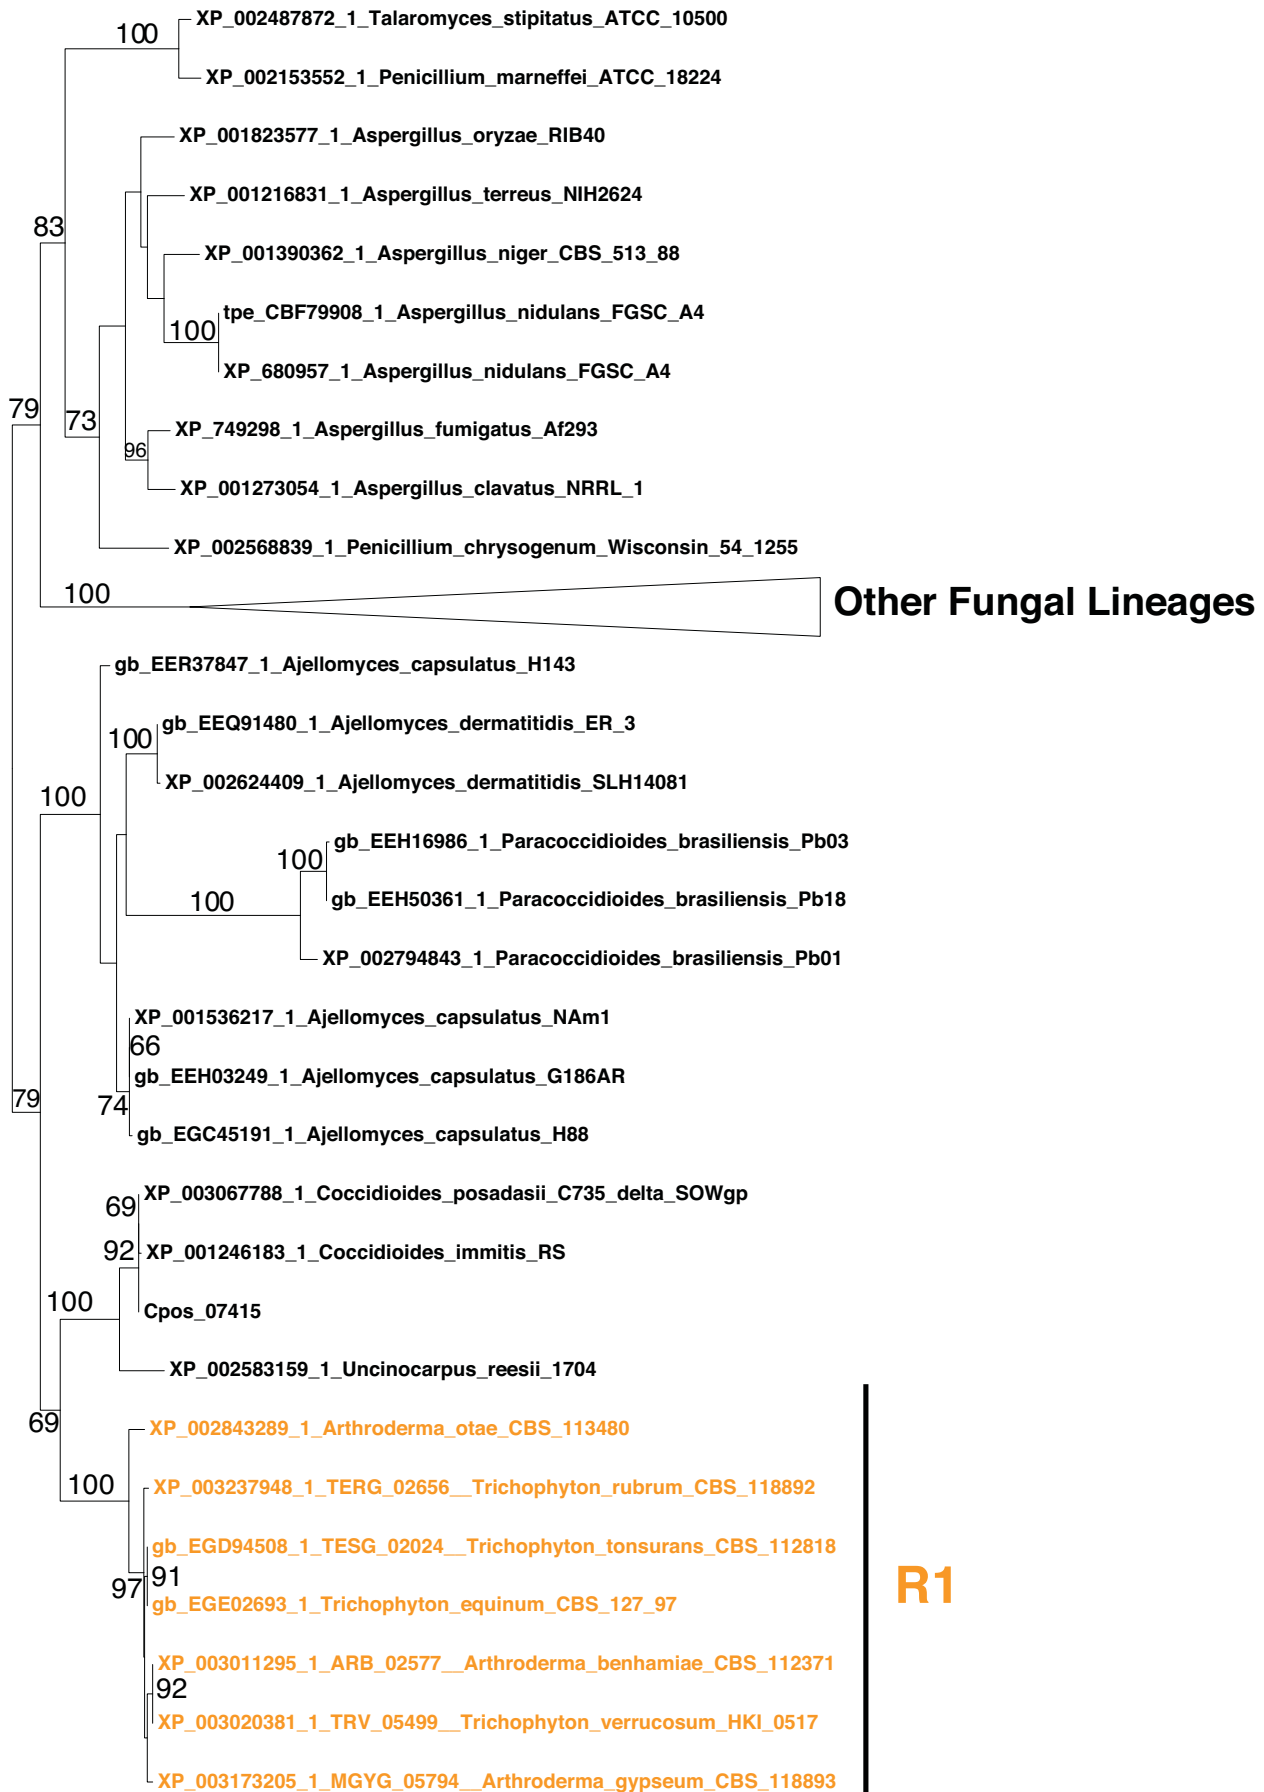

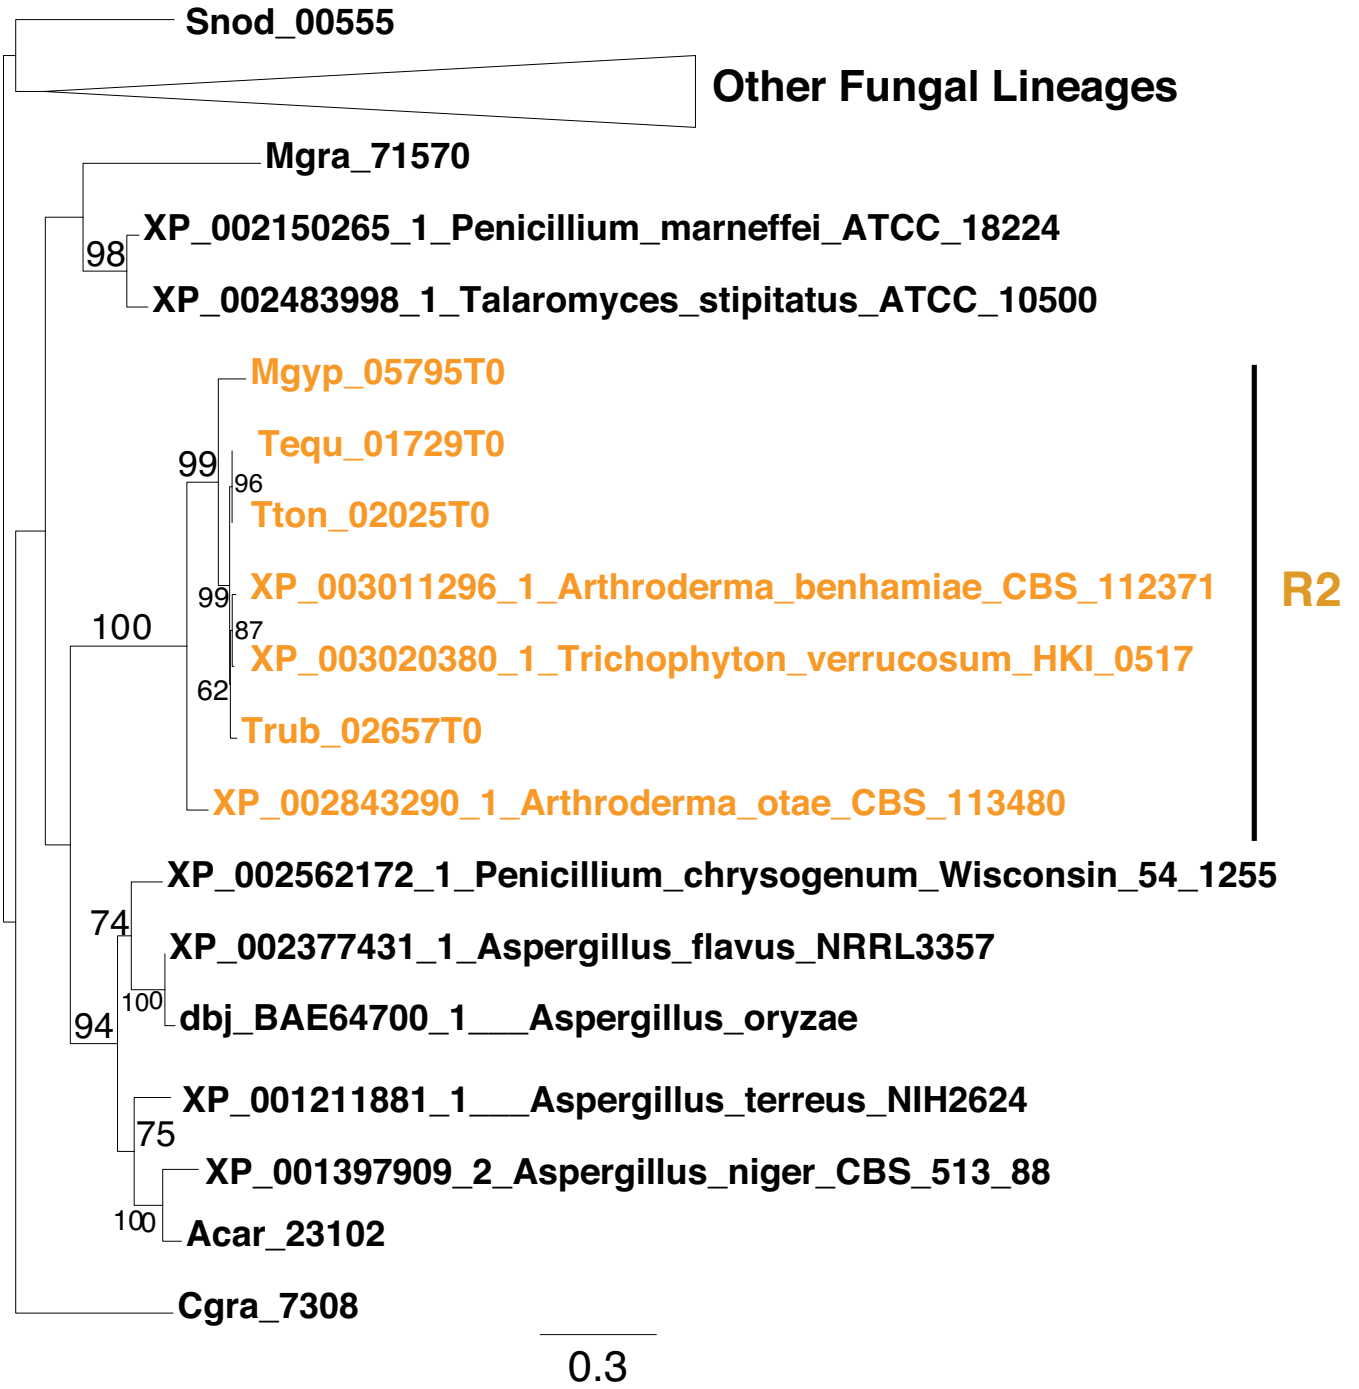

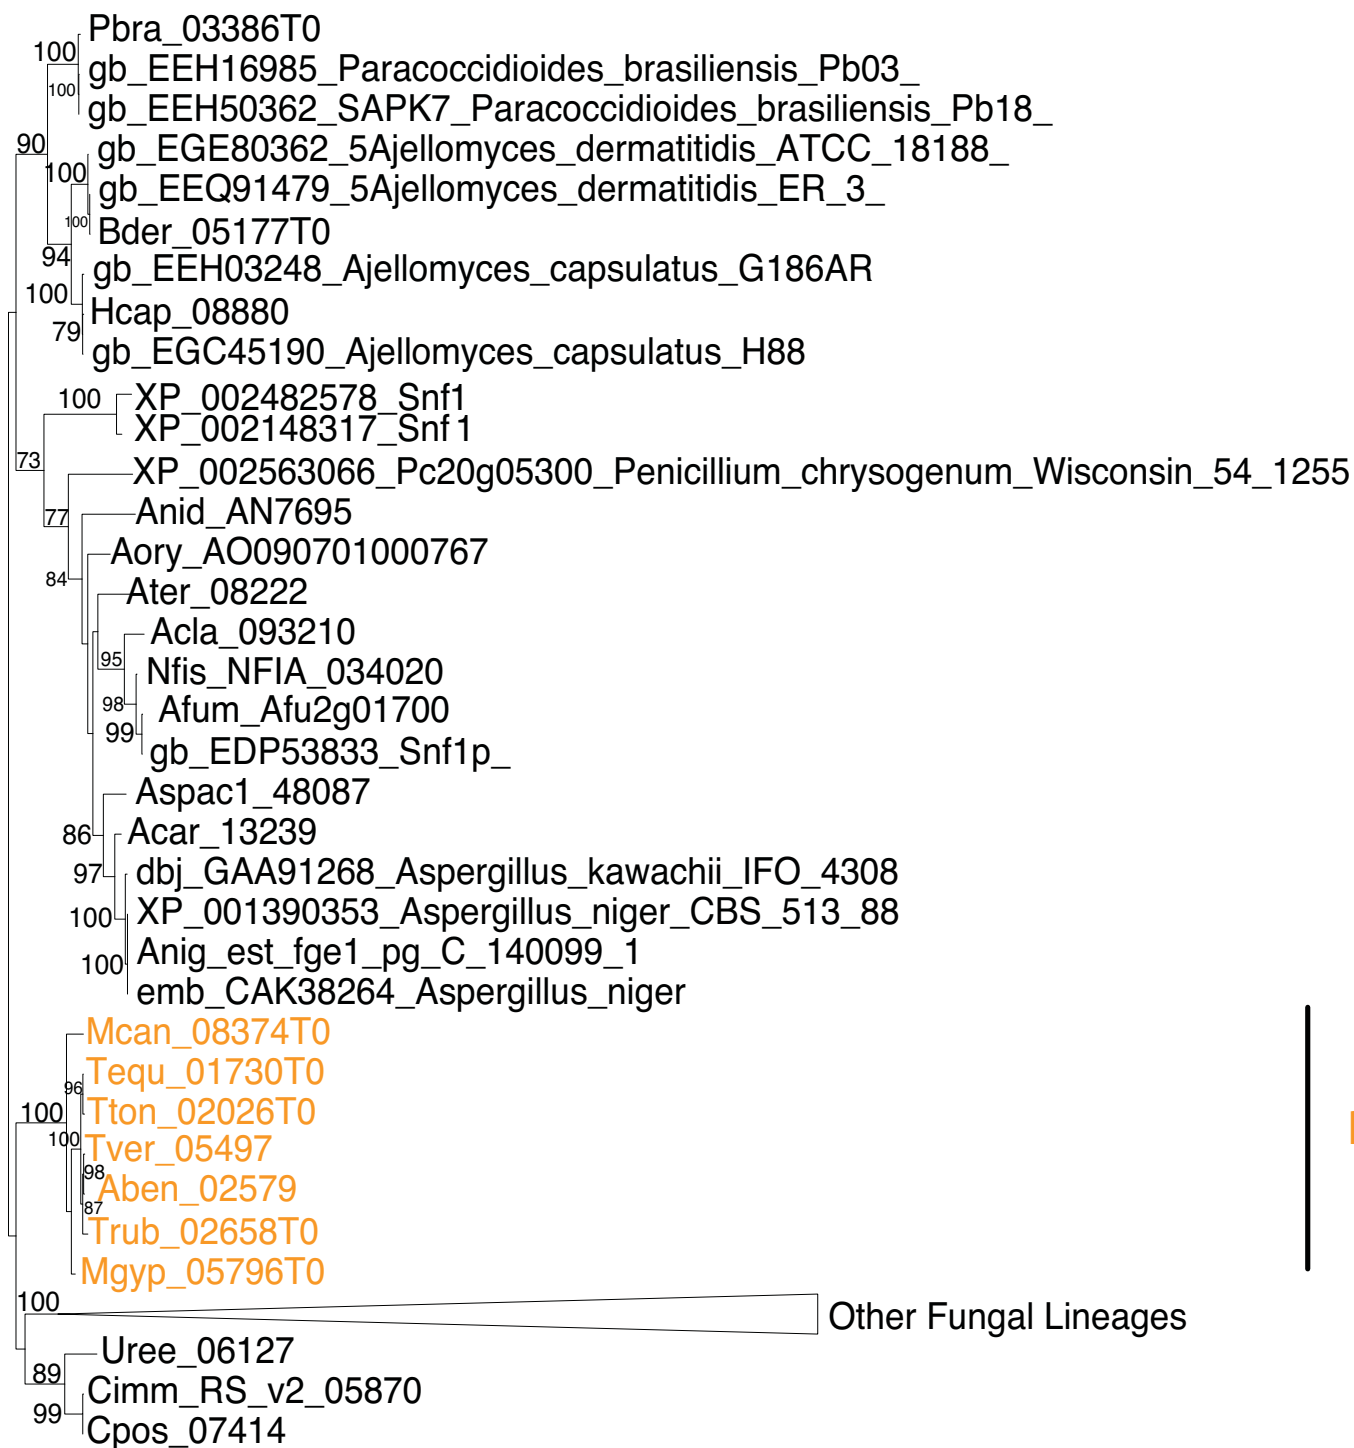

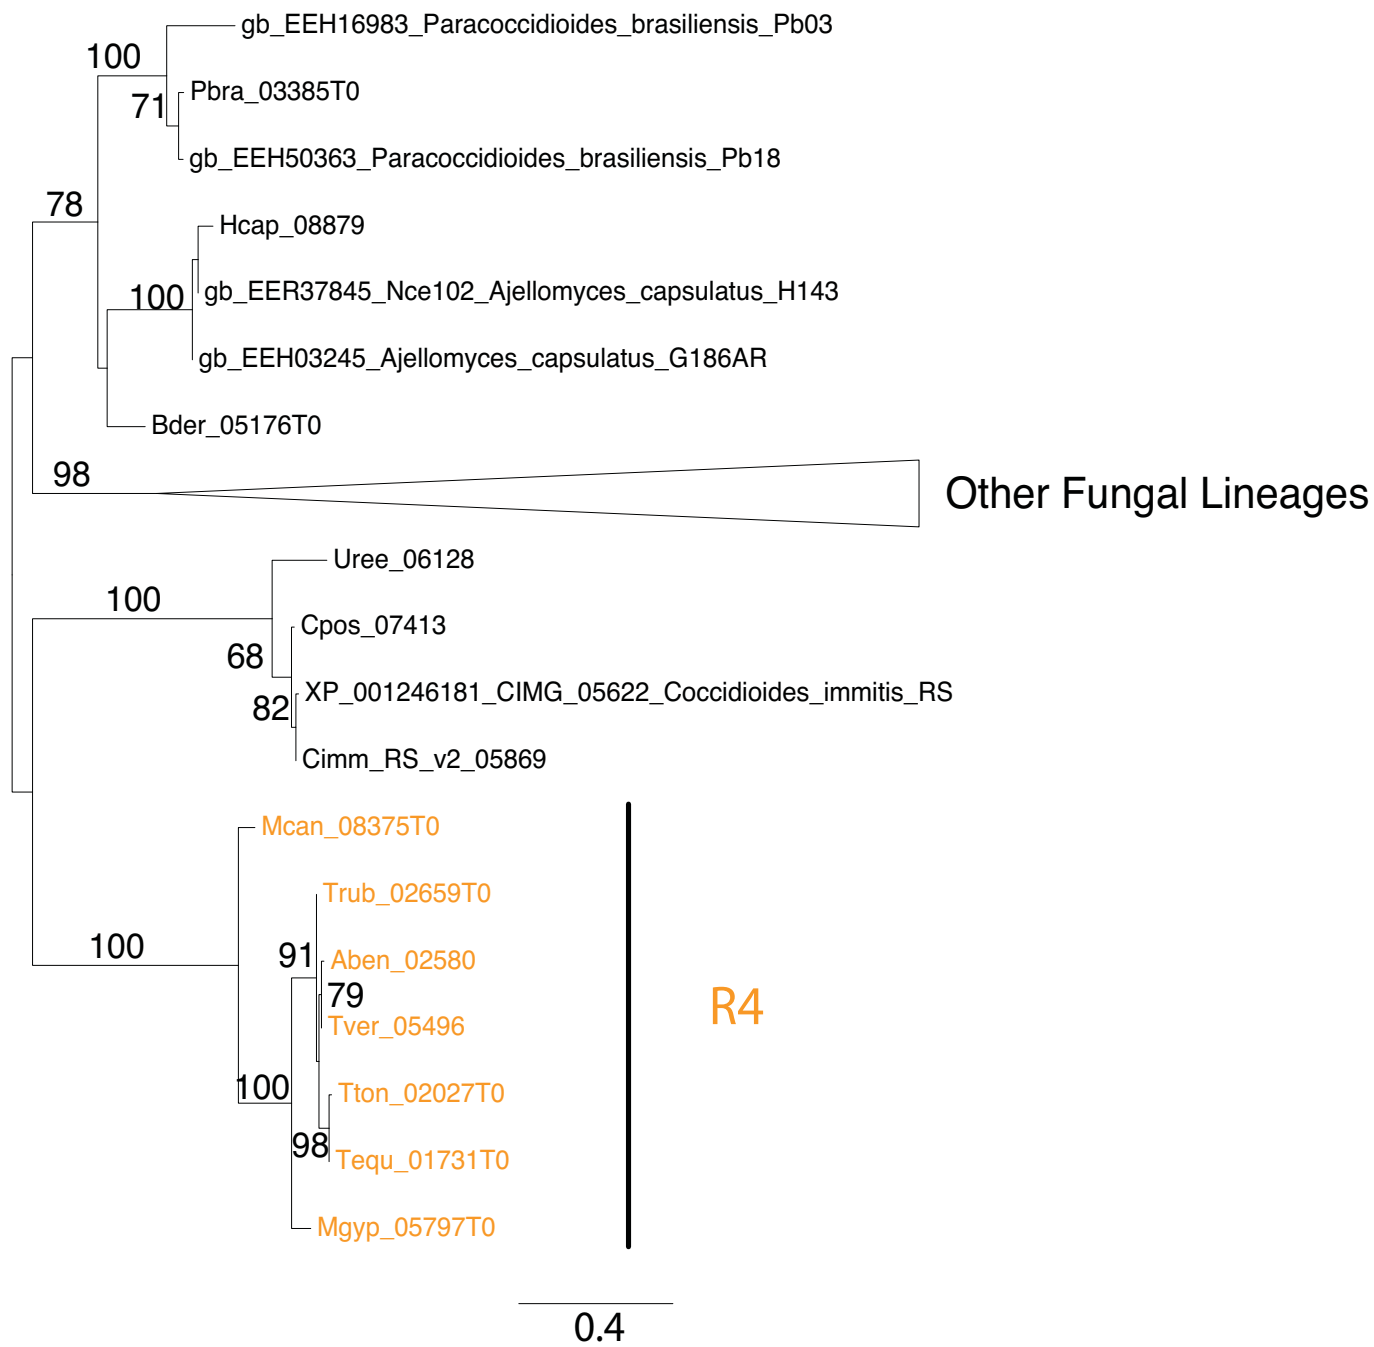

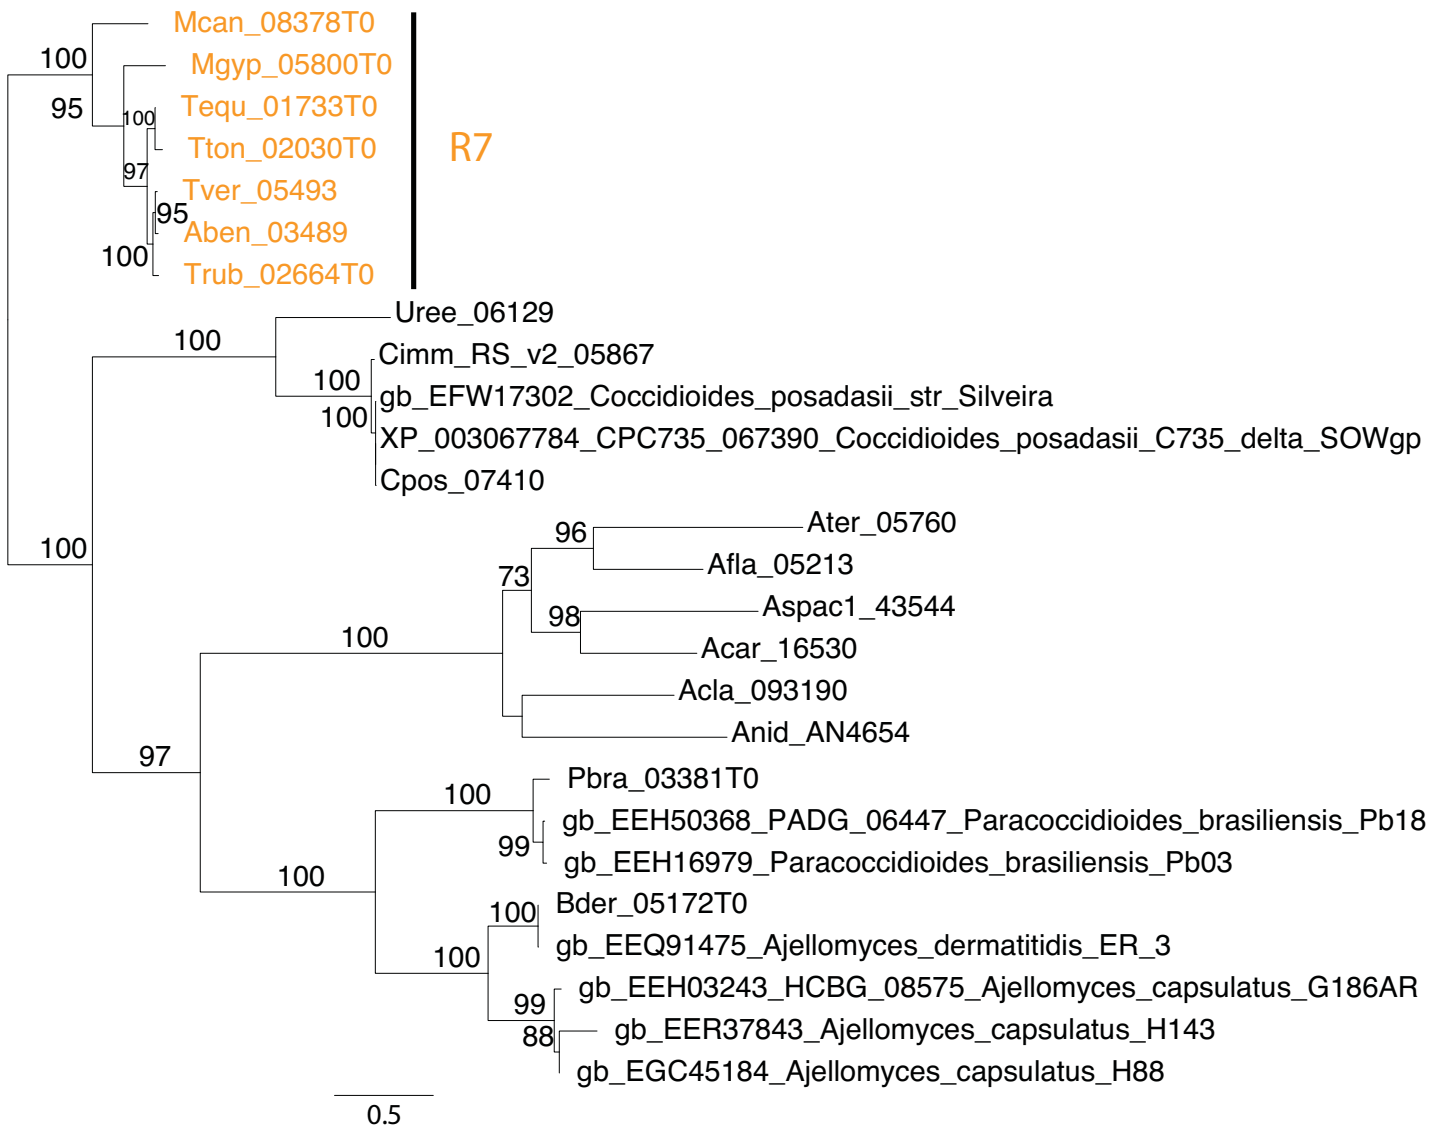

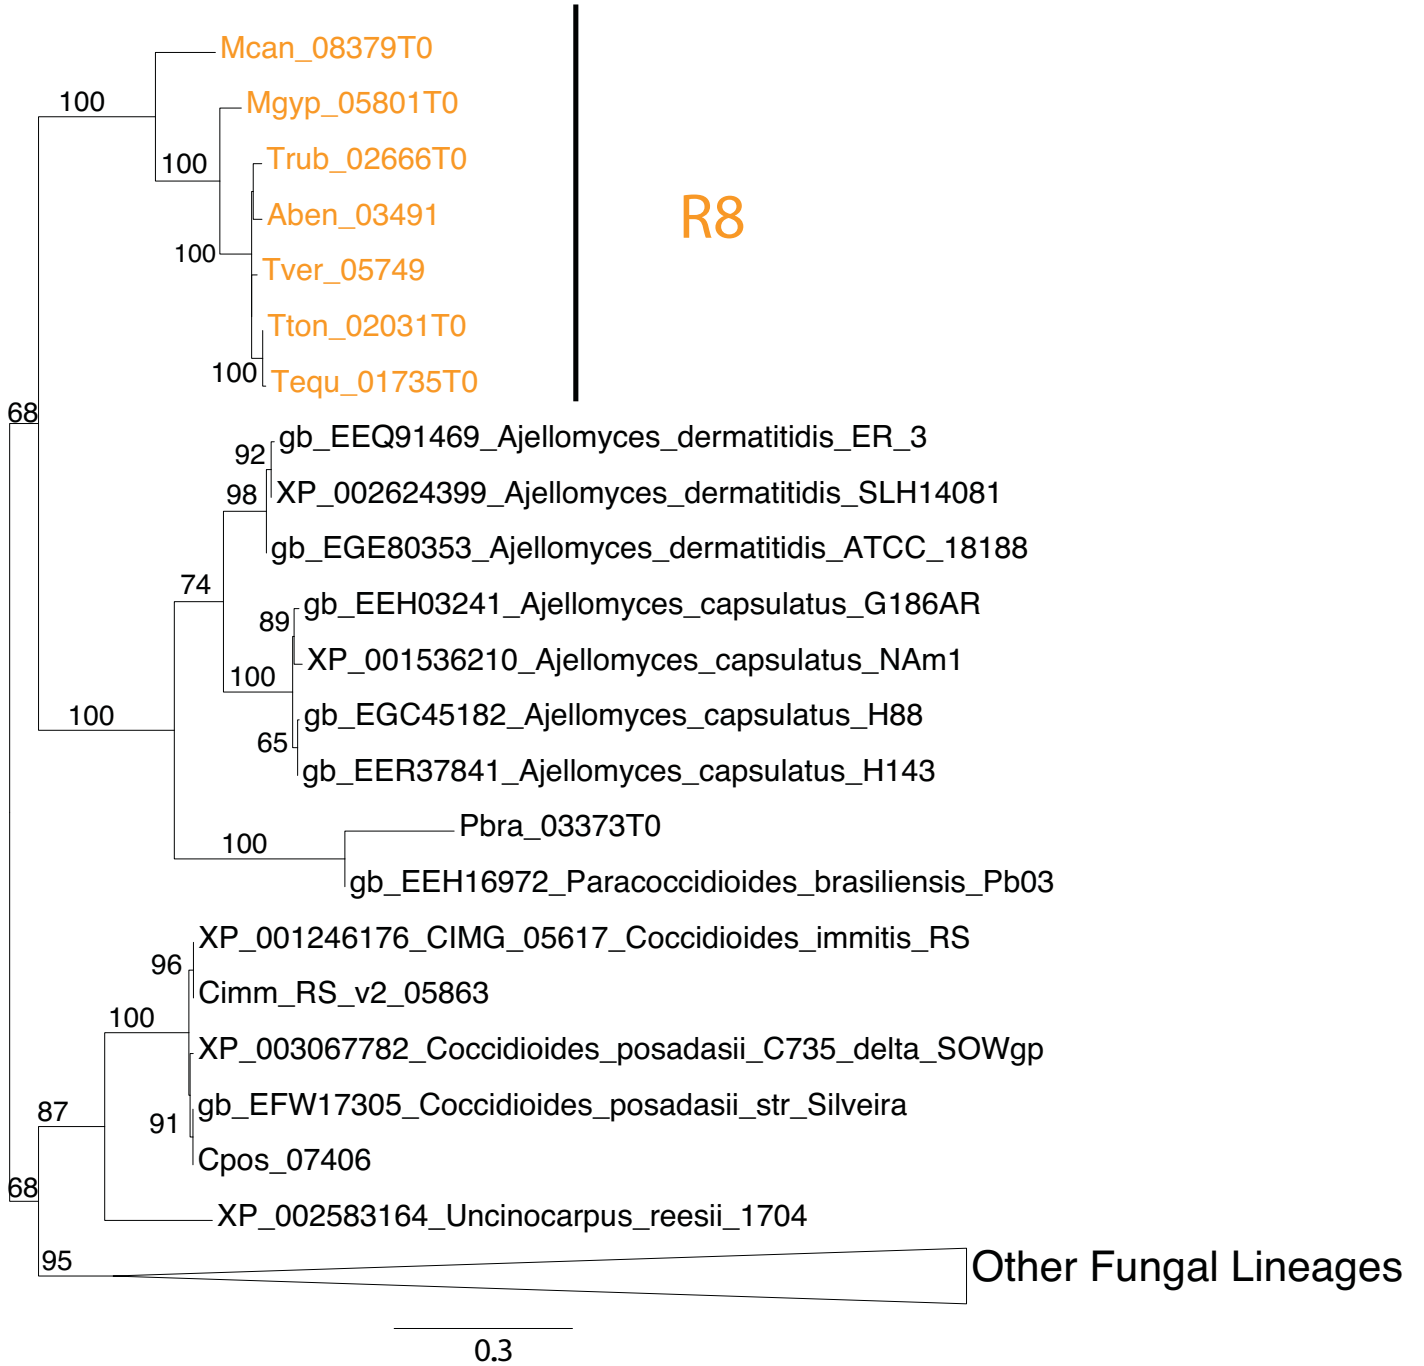



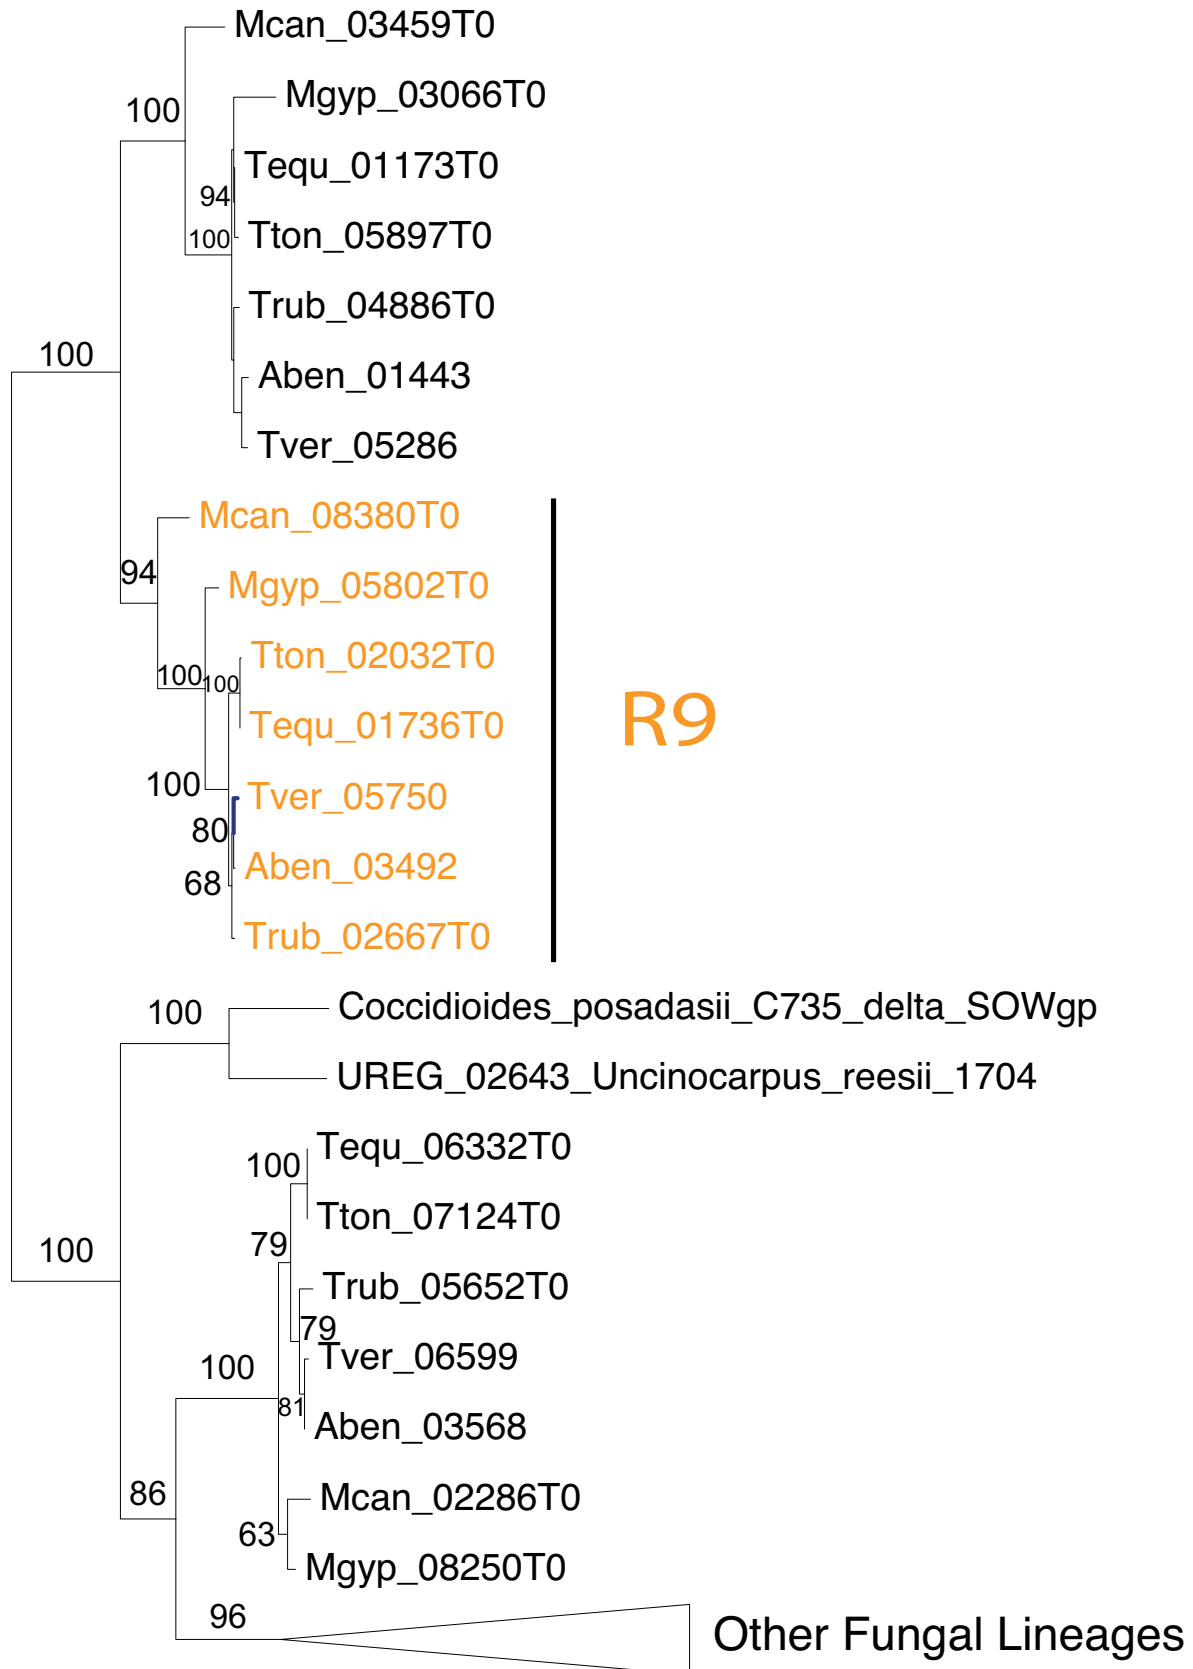

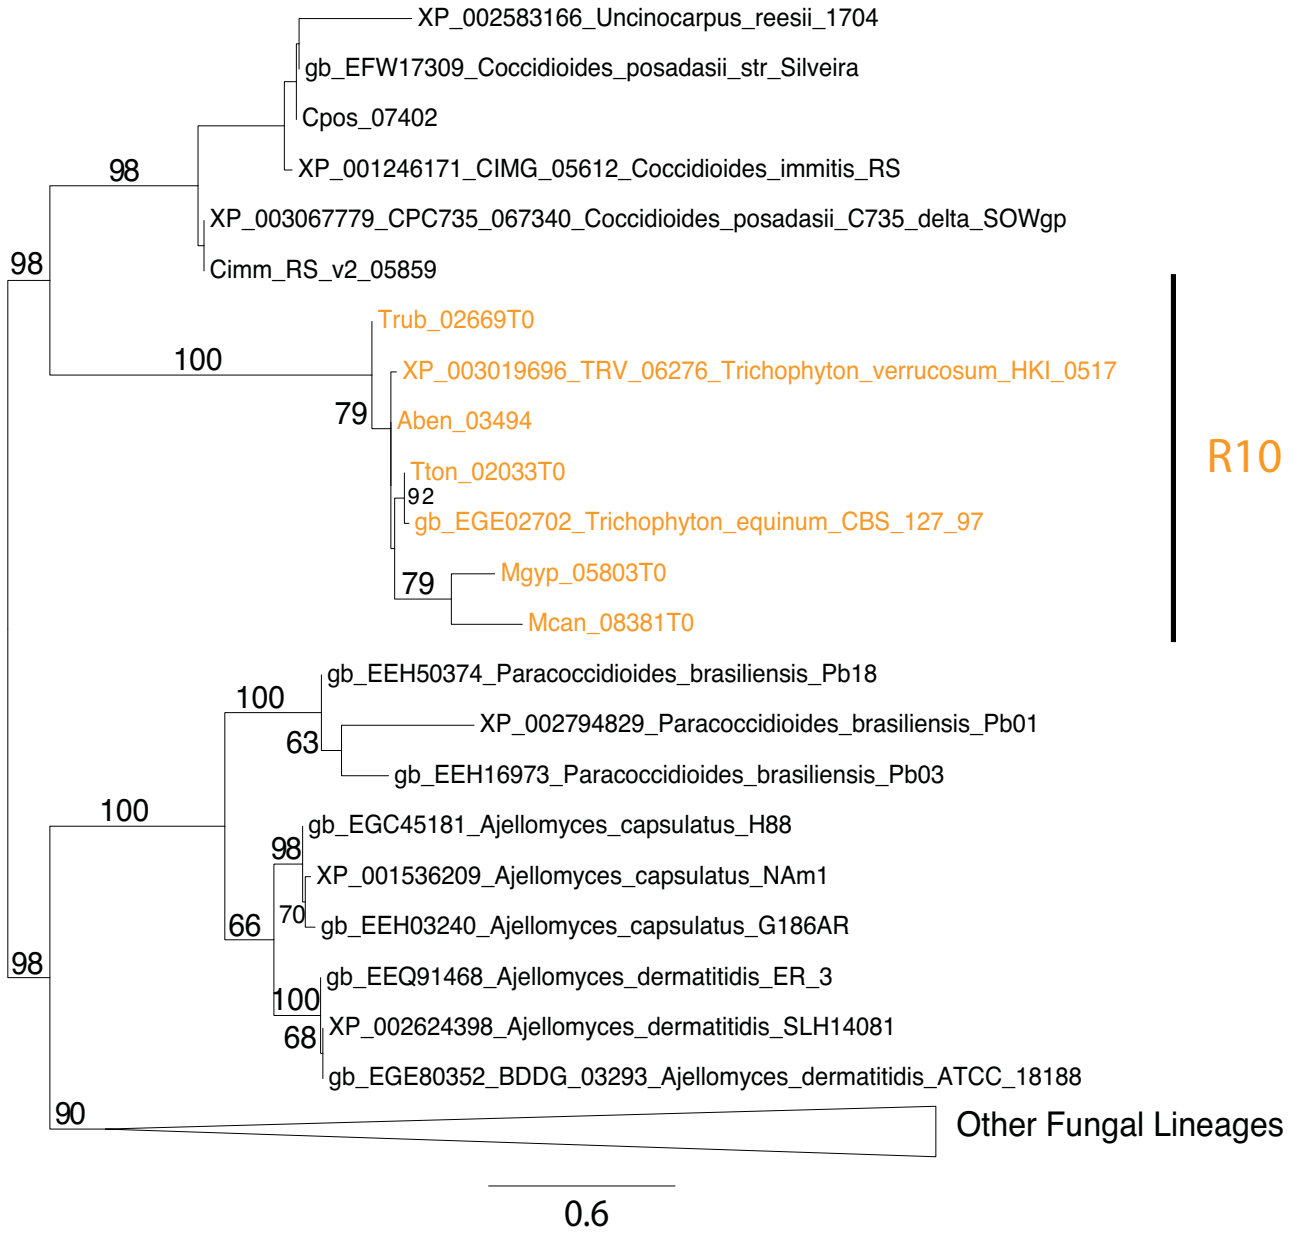

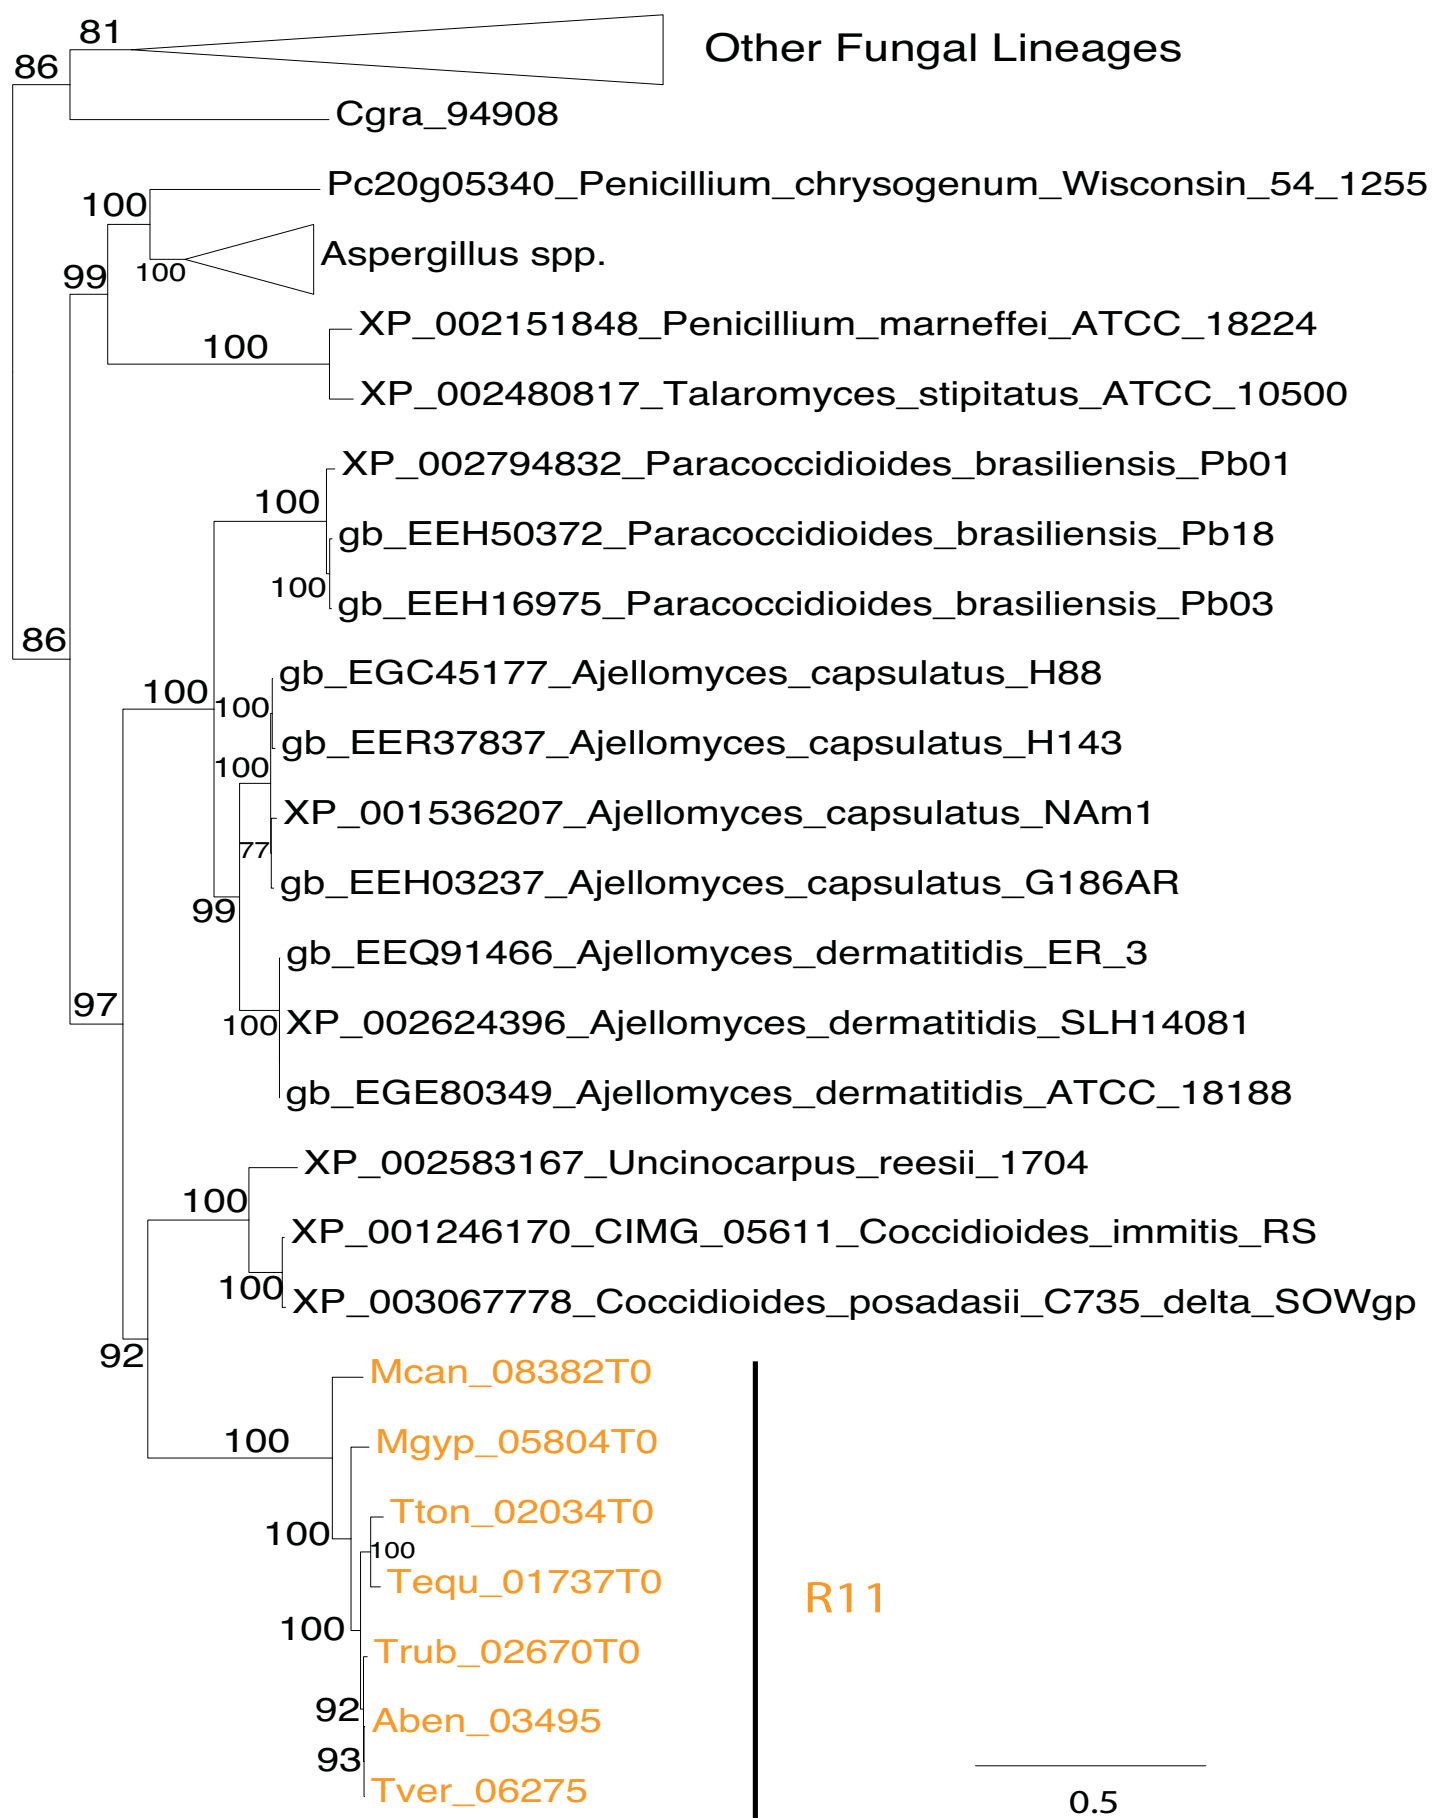

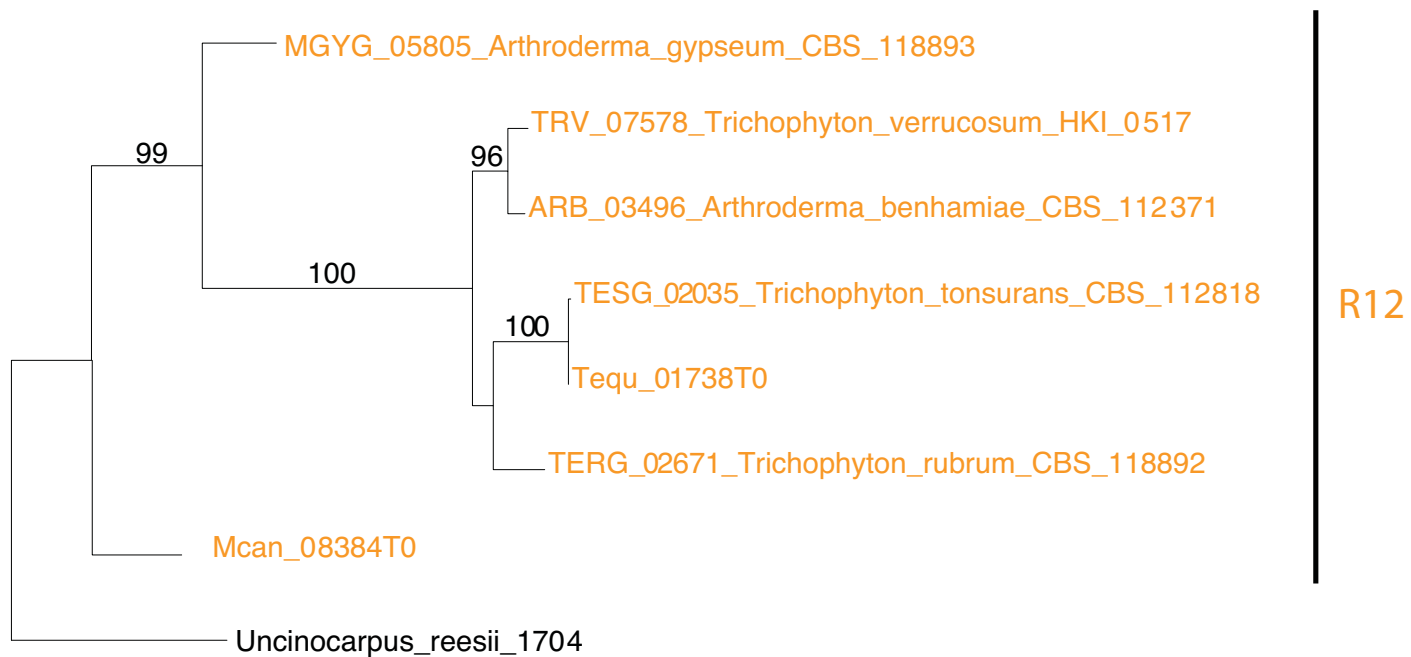

0.2
