# Supplementary material for: Two Different Secondary Metabolism Gene Clusters Occupied the Same Ancestral Locus in Fungal Dermatophytes of the Arthrodermataceae
Source: PubMed Central journal article supplement (PMC3408471; doi:10.1371/journal.pone.0041903), 2012-07-30

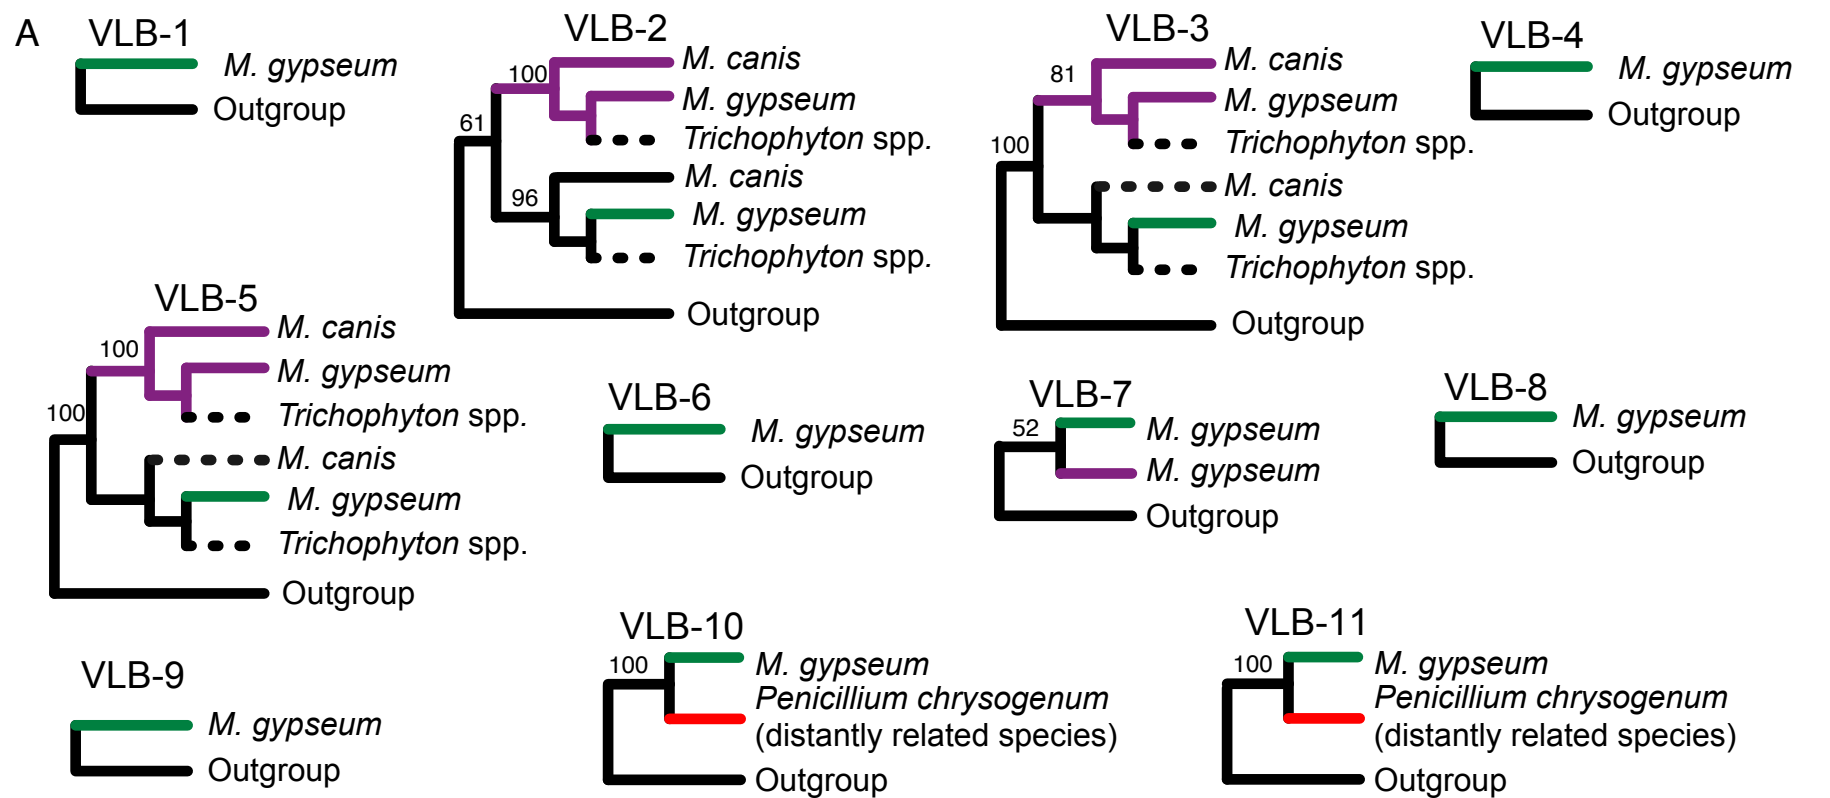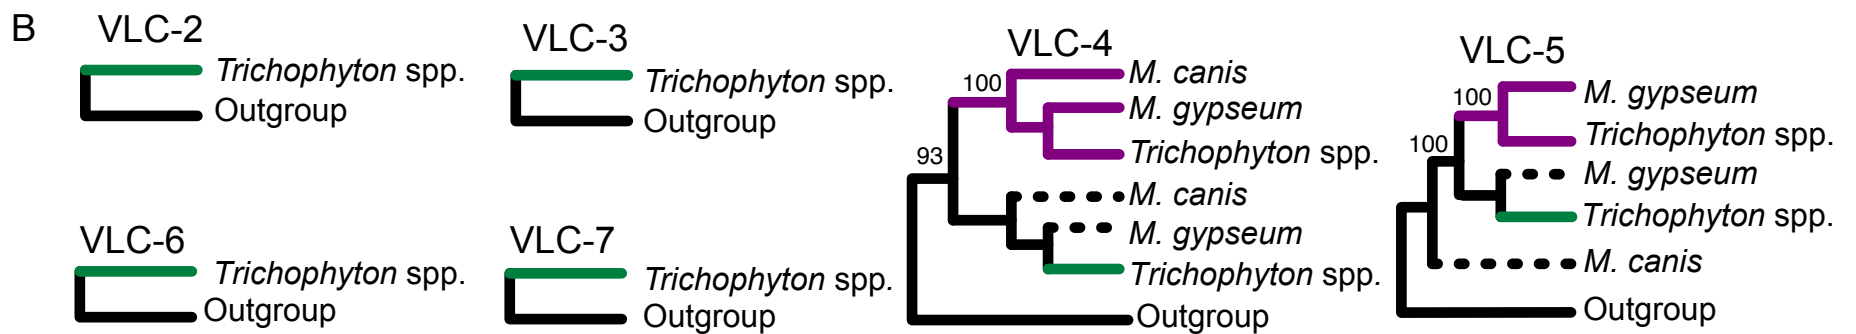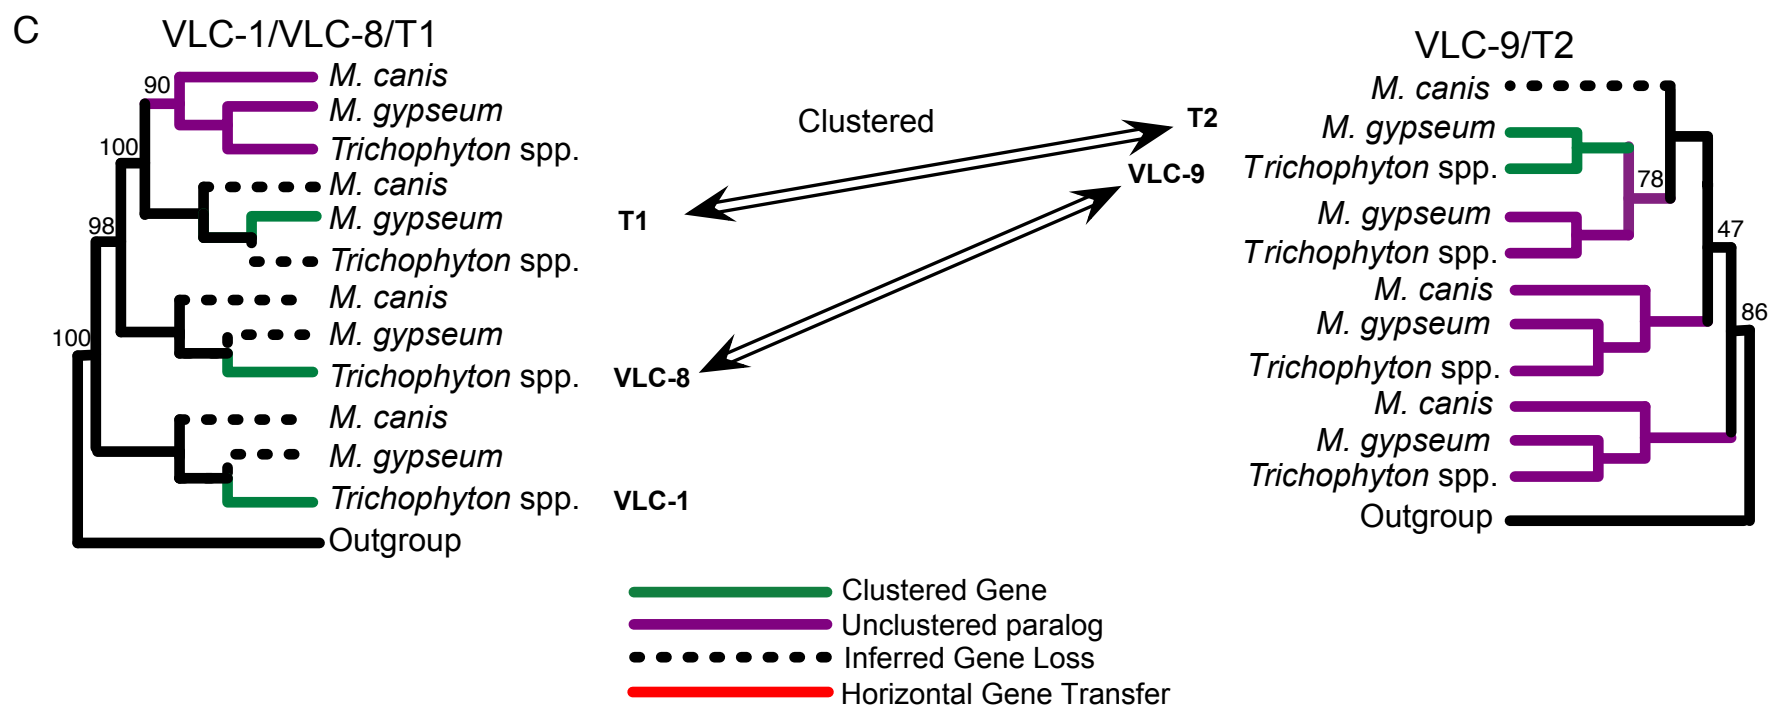

Supplement: pone.0041903.s003.pdf [file pone.0041903.s003.pdf]
