# Supplementary material for: Two Different Secondary Metabolism Gene Clusters Occupied the Same Ancestral Locus in Fungal Dermatophytes of the Arthrodermataceae
Source: PubMed Central journal article supplement (PMC3408471; doi:10.1371/journal.pone.0041903), 2012-07-30
Supplement: pone.0041903.s004.pdf [file pone.0041903.s004.pdf]

| <b>Species</b>                          | <b>Strain</b>      | <b>Genome Center[1]</b> |
|-----------------------------------------|--------------------|-------------------------|
| <b>Acremonium alcalophilum</b>          | v1.0               | JGI                     |
| <b>Agaricus bisporus var. bisporus</b>  | H97                | JGI                     |
| <b>Agaricus bisporus var. burnettii</b> | JB 137-S8          | JGI                     |
| <b>Allomyces macrogynus</b>             | ATCC 38327         | Broad                   |
| <b>Arthroderma benhamiae</b>            | CBS 112371         | Broad                   |
| <b>Aspergillus aculeatus</b>            | ATCC16872 v1.1     | JGI                     |
| <b>Aspergillus carbonarius</b>          | ITEM 5010          | JGI                     |
| <b>Aspergillus clavatus</b>             | NRRL 1             | TIGR/JCVI               |
| <b>Aspergillus flavus</b>               | NRRL 3357          | TIGR/JCVI               |
| <b>Aspergillus fumigatus</b>            | Af293              | TIGR/JCVI               |
| <b>Aspergillus nidulans</b>             | FGSC A4            | Broad                   |
| <b>Aspergillus niger</b>                | CBS518.33          | DSM                     |
| <b>Aspergillus oryzae</b>               | RIB40 / ATCC 42149 | NITE                    |
| <b>Aspergillus terreus</b>              | NIH 2624           | Broad                   |
| <b>Auricularia delicata</b>             | SS-5 v1.0          | JGI                     |
| <b>Batrachochytrium dendrobatidis</b>   | JEL423             | Broad                   |
| <b>Blastomyces dermatitidis</b>         | SLH-14081          | Broad                   |
| <b>Botrytis cinerea</b>                 | B05.10             | Broad                   |
| <b>Candida albicans</b>                 | SC5314             | Biozentrum              |
| <b>Candida glabrata</b>                 | CBS138             | Genolevures             |
| <b>Candida guilliermondii</b>           | ATCC6260           | Broad                   |
| <b>Candida lusitanae</b>                | ATCC42720          | Broad                   |
| <b>Candida parapsilosis</b>             | CDC317             | Broad                   |
| <b>Candida tropicalis</b>               | MYA3404            | Broad                   |
| <b>Ceriporiopsis subvermispora</b>      | B                  | JGI                     |

|                                            |                                              |                     |
|--------------------------------------------|----------------------------------------------|---------------------|
| <b>Chaetomium globosum</b>                 | CBS 148.51                                   | Broad               |
| <b>Cladonia grayi</b>                      |                                              | Duke                |
| <b>Coccidioides immitis</b>                | RS                                           | Broad               |
| <b>Cochliobolus heterostrophus</b>         | C5                                           | JGI                 |
| <b>Coniophora puteana</b>                  | v1.0                                         | JGI                 |
| <b>Coprinopsis cinerea</b>                 | Okayama7#130                                 | Broad               |
| <b>Cryphonectria parasitica</b>            | EP155                                        | JGI                 |
| <b>Cryptococcus gattii</b>                 | R265                                         | Broad               |
| <b>Cryptococcus gattii</b>                 | WM276                                        | CMSGSC              |
| <b>Cryptococcus neoformans</b>             | B-3501A                                      | Stanford University |
| <b>Cryptococcus neoformans</b>             | JEC21                                        | TIGR/JCVI           |
| <b>Cryptococcus neoformans var. grubii</b> | H99                                          | Broad               |
| <b>Dacryopinax sp.</b>                     | DJM 731 SSP1                                 | JGI                 |
| <b>Debaryomyces hansenii</b>               | CBS 767                                      | Genolevures         |
| <b>Dichomitus squalens</b>                 | v1.0                                         | JGI                 |
| <b>Dothistroma septosporum</b>             | NZE10 v1.0                                   | JGI                 |
| <b>Encephalitozoon cuniculi</b>            | GB-M1                                        | Genoscope           |
| <b>Eremothecium gossypii</b>               | ATCC 10895                                   | Stanford University |
| <b>Fomitiporia mediterranea</b>            | v1.0                                         | JGI                 |
| <b>Fomitopsis pinicola</b>                 | SS1 v1.0                                     | JGI                 |
| <b>Fusarium graminearum</b>                | NRRL 31084                                   | Broad               |
| <b>Fusarium oxysporum</b>                  | 4287 (race 2, VCG 0030)=FGSC 4286=NRRL 34936 | Broad               |
| <b>Fusarium verticillioides</b>            | 7600=FRC M3125=NRRL 20956                    | Broad               |
| <b>Gloeophyllum trabeum</b>                | v1.0                                         | JGI                 |

|                                     |              |                                                                  |
|-------------------------------------|--------------|------------------------------------------------------------------|
| <b>Hansenula polymorpha</b>         | CBS4732      | Institute for Microbiology, Heinrich-Heine University Düsseldorf |
| <b>Heterobasidion annosum</b>       |              | JGI                                                              |
| <b>Histoplasma capsulatum</b>       | NAm1 (WU24)  | Broad                                                            |
| <b>Hysterium pulicare</b>           |              | JGI                                                              |
| <b>Kluyveromyces lactis</b>         | CLIB210      | Genolevures                                                      |
| <b>Kluyveromyces thermotolerans</b> | CBS6340      | Genolevures                                                      |
| <b>Kluyveromyces waltii</b>         | NCYC2644     | Broad                                                            |
| <b>Laccaria bicolor</b>             | S238N-H82    | JGI                                                              |
| <b>Leptosphaeria maculans</b>       |              | JGI                                                              |
| <b>Lodderomyces elongisporus</b>    | NRRL YB-4239 | Broad                                                            |
| <b>Magnaporthe grisea</b>           | 70-15        | Broad                                                            |
| <b>Magnaporthe oryzae</b>           | 70-15        | Broad                                                            |
| <b>Magnaporthe poae</b>             | ATCC 64411   | Broad                                                            |
| <b>Malassezia globosa</b>           | CBS 7966     | JGI                                                              |
| <b>Melampsora laricis-populina</b>  | 98AG31       | JGI                                                              |
| <b>Microsporium canis</b>           | CBS 113480   | Broad                                                            |
| <b>Microsporium gypseum</b>         | CBS 118893   | Broad                                                            |
| <b>Mucor circinelloides</b>         | CBS 277.49   | JGI                                                              |
| <b>Mycosphaerella fijiensis</b>     | CIRAD86      | JGI                                                              |
| <b>Mycosphaerella graminicola</b>   | IPO323       | JGI                                                              |
| <b>Nectria haematococca</b>         | MPVI         | JGI                                                              |
| <b>Neosartorya fischeri</b>         | NRRL 181     | TIGR/JCVI                                                        |
| <b>Neurospora crassa</b>            | OR74A        | Broad                                                            |
| <b>Neurospora discreta</b>          | FGSC 8579    | JGI                                                              |

|                                         |                                 |             |
|-----------------------------------------|---------------------------------|-------------|
| <b>Neurospora tetrasperma</b>           | FGSC 2508                       | JGI         |
| <b>Paracoccidioides brasiliensis</b>    | Pb01                            | Broad       |
| <b>Phanerochaete chrysosporium</b>      | RP-78                           | JGI         |
| <b>Phycomyces blakesleeanus</b>         |                                 | JGI         |
| <b>Pichia membranifaciens</b>           | v1.0                            | JGI         |
| <b>Pichia stipitis</b>                  | CBS 6054.05                     | JGI         |
| <b>Pleurotus ostreatus</b>              | PC15                            | JGI         |
| <b>Pneumocystis carinii</b>             |                                 | CCHMC       |
| <b>Podospora anserina</b>               | DSM 980                         | Genoscope   |
| <b>Postia placenta</b>                  | Mad-698-R                       | JGI         |
| <b>Puccinia graminis f. sp. tritici</b> | CRL 75-36-700-3                 | Broad       |
| <b>Punctularia strigosozonata</b>       | v1.0                            | JGI         |
| <b>Pyrenophora teres</b>                | f. teres                        | JGI         |
| <b>Pyrenophora tritici-repentis</b>     | Pt-1C-BFP                       | Broad       |
| <b>Rhizopus oryzae</b>                  | RA 99-880                       | Broad       |
| <b>Rhodotorula graminis</b>             | strain WP1 v1.1                 | JGI         |
| <b>Rhytidhysterium rufulum</b>          |                                 | JGI         |
| <b>Saccharomyces bayanus</b>            | 623-6C (WashU), MCYC623 (Broad) | WashU/Broad |
| <b>Saccharomyces castellii</b>          | NRRL_Y-12630                    | WashU       |
| <b>Saccharomyces cerevisiae</b>         | S288c                           | Broad       |
| <b>Saccharomyces kluyveri</b>           | NRRL_Y-12651                    | WashU       |
| <b>Saccharomyces kudriavzevii</b>       | IFO1802                         | WashU       |
| <b>Saccharomyces mikatae</b>            | IFO1815 (both WashU and Broad)  | WashU/Broad |
| <b>Saccharomyces paradoxus</b>          | NRRL_Y-17217                    | Broad       |
| <b>Schizosaccharomyces japonicus</b>    | yFS275                          | Broad       |

|                                       |                          |         |
|---------------------------------------|--------------------------|---------|
| <b>Schizosaccharomyces octosporus</b> | yfs286                   | Broad   |
| <b>Schizosaccharomyces pombe</b>      | 972h-                    | Sanger  |
| <b>Sclerotinia sclerotiorum</b>       | 1980' strain (ATCC18683) | Broad   |
| <b>Septoria musiva</b>                | SO2202 v1.0              | JGI     |
| <b>Serpula lacrymans</b>              | S7.9                     | JGI     |
| <b>Setosphaeria turcica</b>           | Et28A v1.0               | JGI     |
| <b>Spizellomyces punctatus</b>        | DAOM BR117               | Broad   |
| <b>Sporobolomyces roseus</b>          | IAM 13481                | JGI     |
| <b>Sporotrichum thermophile</b>       | v2.0                     | JGI     |
| <b>Stagonospora nodorum</b>           | SN15                     | Broad   |
| <b>Stereum hirsutum</b>               | FP-91666 SS1 v1.0        | JGI     |
| <b>Taphrina deformans(EST only)</b>   |                          | TBestDB |
| <b>Trametes versicolor</b>            | v1.0                     | JGI     |
| <b>Tremella mesenterica Fries</b>     | DSM 1558                 | JGI     |
| <b>Trichoderma atroviride</b>         | IMI 206040               | JGI     |
| <b>Trichoderma reesei</b>             | QM6a                     | JGI     |
| <b>Trichoderma virens</b>             | Gv29-8                   | JGI     |
| <b>Trichophyton equinum</b>           | CBS 127.97               | Broad   |
| <b>Trichophyton rubrum</b>            | CBS 118892               | Broad   |
| <b>Trichophyton tonsurans</b>         | CBS 112818               | Broad   |
| <b>Trichophyton verrucosum</b>        | HKI 0517                 | Broad   |
| <b>Uncinocarpus reesii</b>            | 1704                     | Broad   |
| <b>Ustilago maydis</b>                | 521                      | Broad   |
| <b>Vanderwaltozyma polyspora</b>      | DSM 70294                | YGOB    |
| <b>Verticillium albo-atrum</b>        | VaMs.102                 | Broad   |
| <b>Verticillium dahliae</b>           | VdLs.17                  | Broad   |

|                                 |                  |             |
|---------------------------------|------------------|-------------|
| <b>Wickerhamomyces anomalus</b> | v1.0             | JGI         |
| <b>Wolfiporia cocos</b>         | MD-104 SS10 v1.0 | JGI         |
| <b>Yarrowia lipolytica</b>      | CLIB122          | Genolevures |
| <b>Zygosaccharomyces rouxii</b> | CBS732           | Genolevures |

[1] TIGR/JCVI = J. Craig Venter Institute, DSM = Royal DSM N.V., Broad = The Broad Institute, NITE = National Institute of Technology and Evaluation, Biozentrum = Biozentrum Universität Würzburg, Genolevures = Bioinformatics Center · Bordeaux, JGI = DOE Joint Genome Institute, CMSGSC = Canada's Michael Smith Genome Sciences Centre, Genoscope = French National Sequencing Center, Stanford University = Saccharomyces Genome Database, Stanford University Department of Genetics, CCHMC = University of Cincinnati College of Medicine\_Division of Infectious Diseases, WASHU = The Genome Center at Washington University, TbestDB = Taxinomically Broad EST Database, YGOB = Yeast Gene Order Browser, Duke = Duke's Institute for Genome Sciences and Policy
